# Supplementary material
Source: PubMed Central journal article supplement (PMC5849576)
Supplement: NIHMS947623-supplement.pdf [file NIHMS947623-supplement.pdf]

## Supporting information

### Synthesis and biological evaluation of indole-based UC-112 analogs as potent and selective survivin inhibitors

Qinghui Wang<sup>1,3</sup>, Kinsie E. Arnst<sup>1</sup>, Yi Xue<sup>1</sup>, Zi-Ning Lei<sup>2</sup>, Dejian Ma<sup>1</sup>, Zhe-Sheng Chen<sup>2</sup>, Duane D. Miller<sup>1</sup>, Wei Li<sup>1\*</sup>

<sup>1</sup> Department of Pharmaceutical Sciences, University of Tennessee Health Science Center, Memphis, TN, 38163, United States of America

<sup>2</sup> College of Pharmacy and Health Sciences, St. John's University, Queens, NY, 11439, United States of America

<sup>3</sup>Current address: Department of Pharmacology, Weill Cornell Medical College, New York, NY, 10065, United States of America

E-mail: wli@uthsc.edu

#### Table of contents:

|                                              |         |
|----------------------------------------------|---------|
| 1. Spectral data for compound <b>2a-2d</b>   | S3-S8   |
| 2. Spectral data for compound <b>6a-6f</b>   | S9-S17  |
| 3. Spectral data for compound <b>8</b>       | S18-S19 |
| 4. Spectral data for compound <b>10a-10v</b> | S19-S52 |
| 5. Spectral data for compound <b>3</b>       | S52     |

|                                                                     |     |
|---------------------------------------------------------------------|-----|
| 6. Spectral data for compound <b>4</b>                              | S53 |
| 7. Surface representation of <b>10f</b> binding in survivin protein | S54 |



QW-IV-68 86 (1.783)

1: TOF MS ES+  
2.81e7

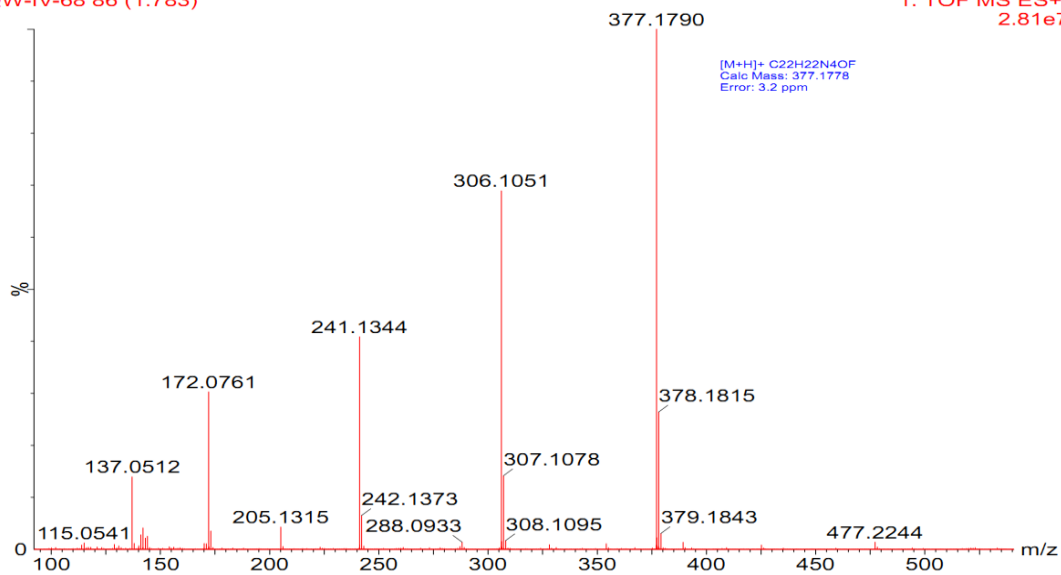

### HR-MS of 2a

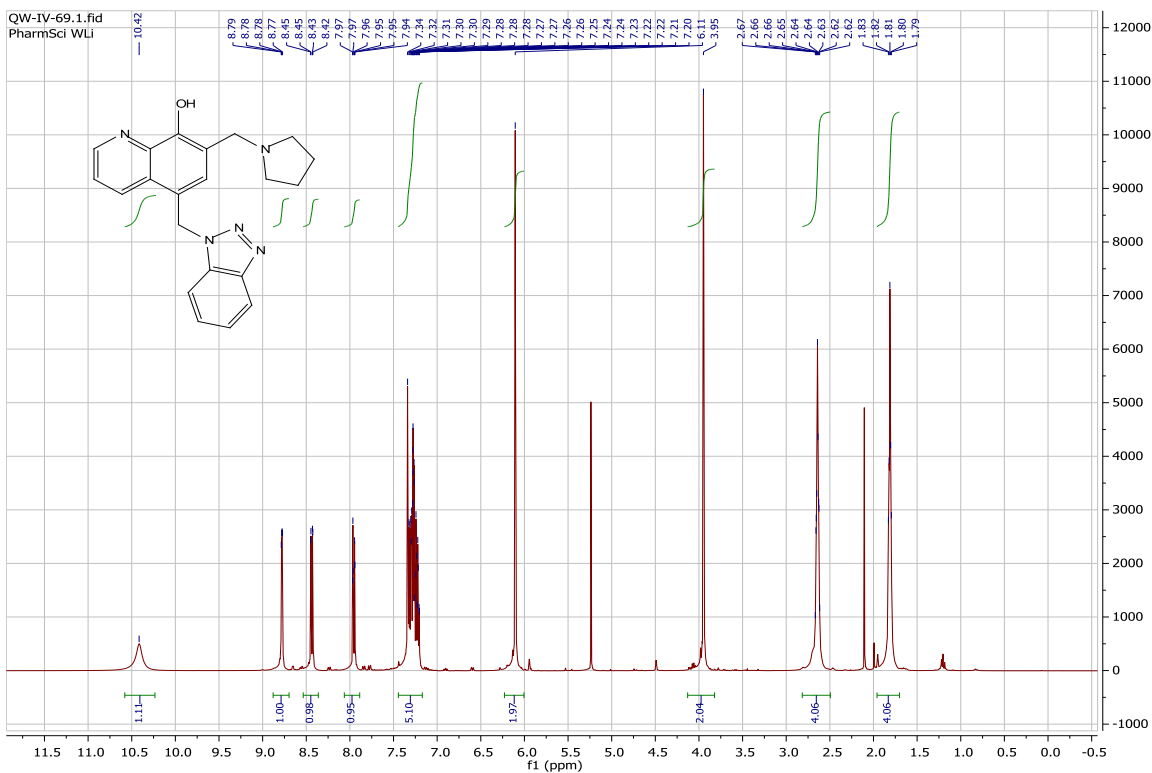

### <sup>1</sup>H-NMR of 2b



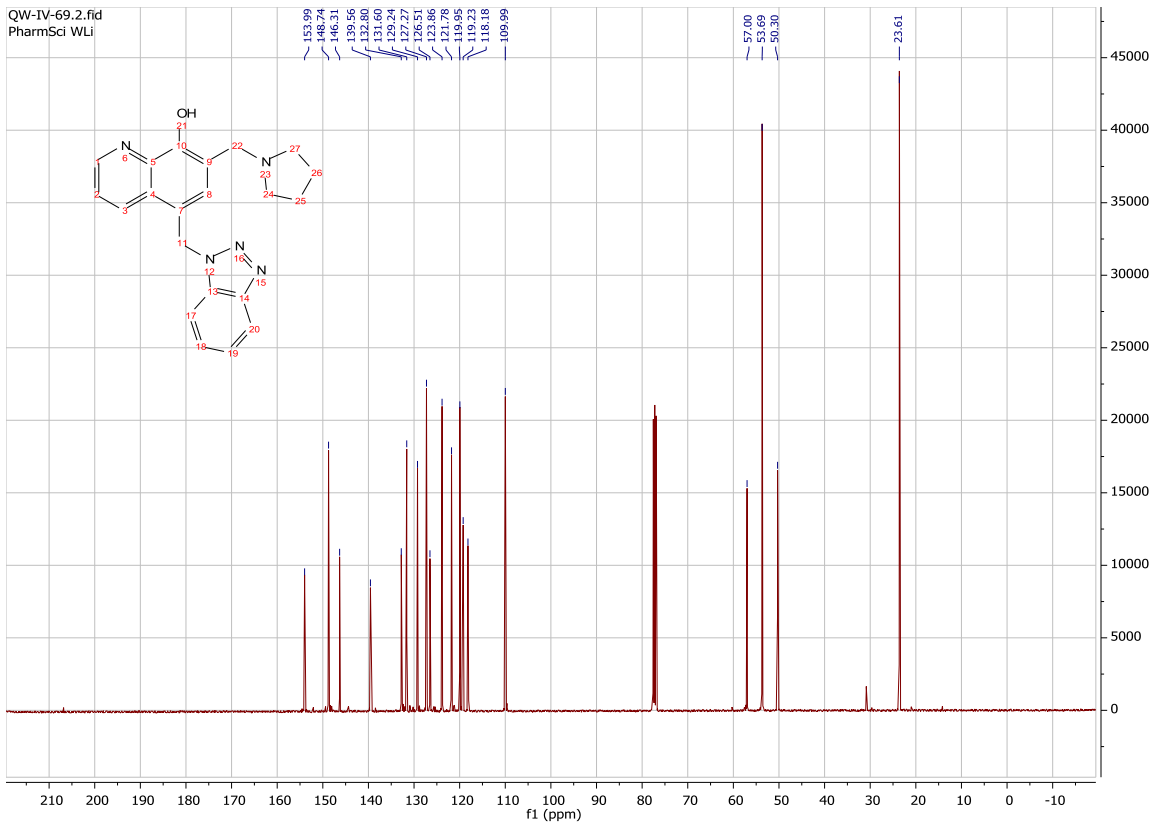

$^{13}\text{C}$ -NMR of **2b**

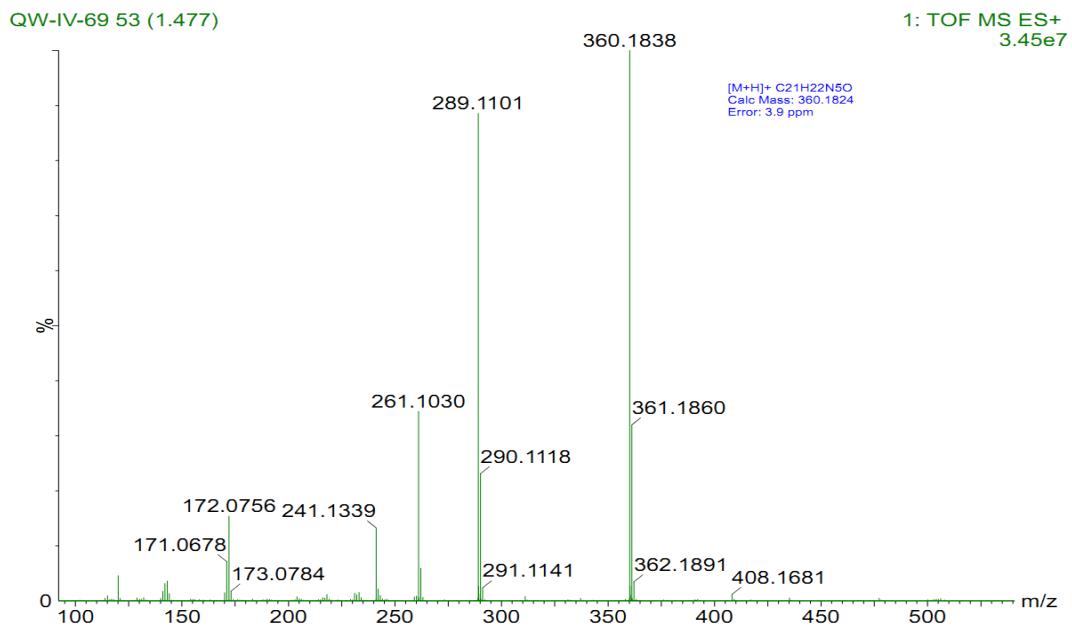

HR-MS of **2b**

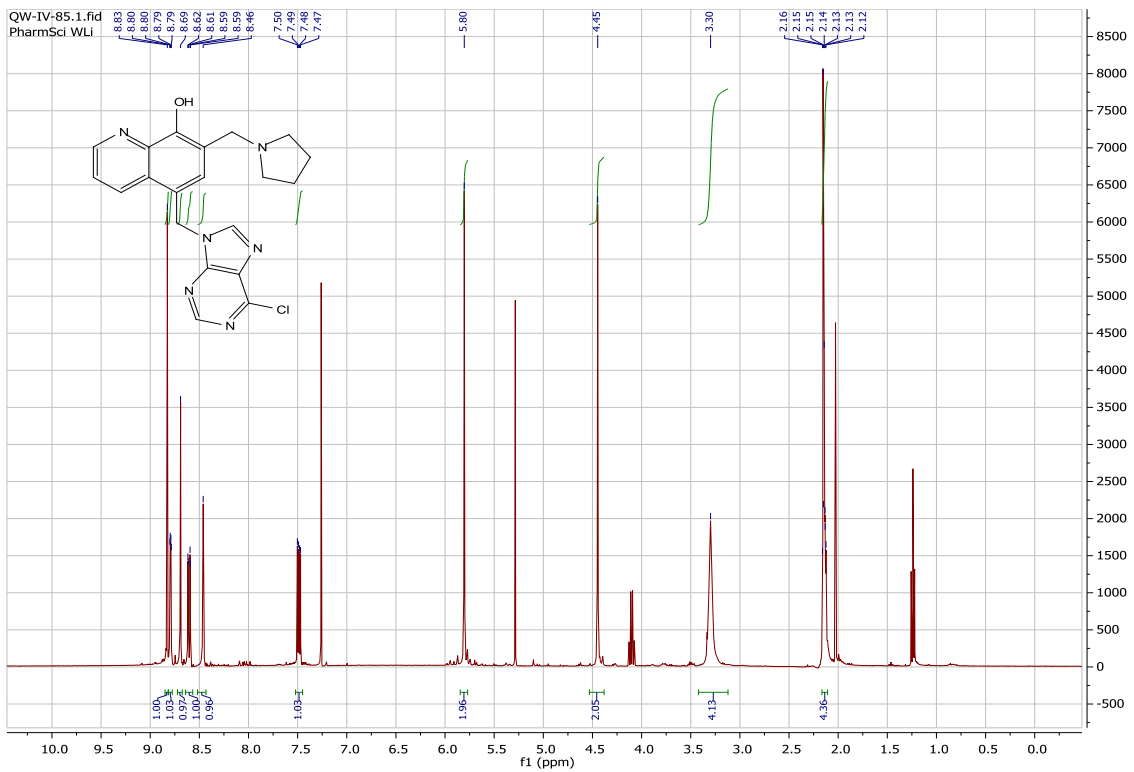

$^1\text{H-NMR}$  of **2c**

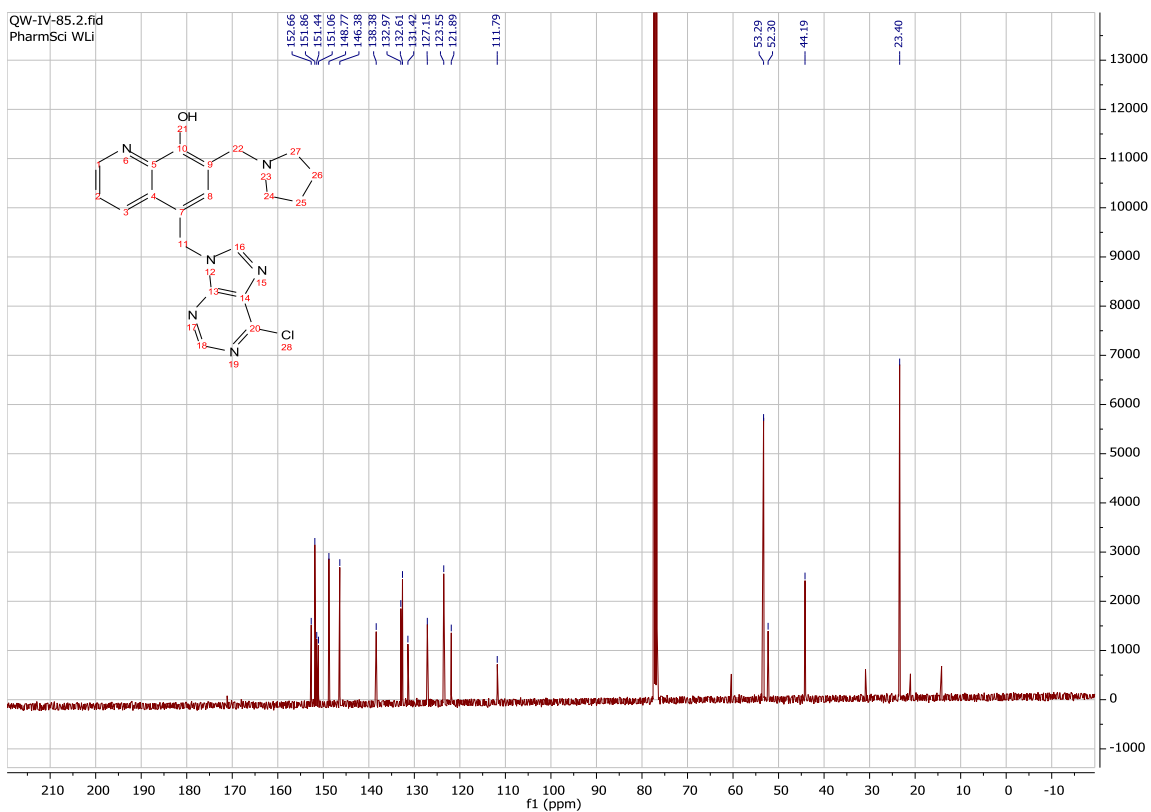

$^{13}\text{C-NMR}$  of **2c**

S110717\_QW-IV-85 12 (1.103)

1: TOF MS ES+  
4.22e7

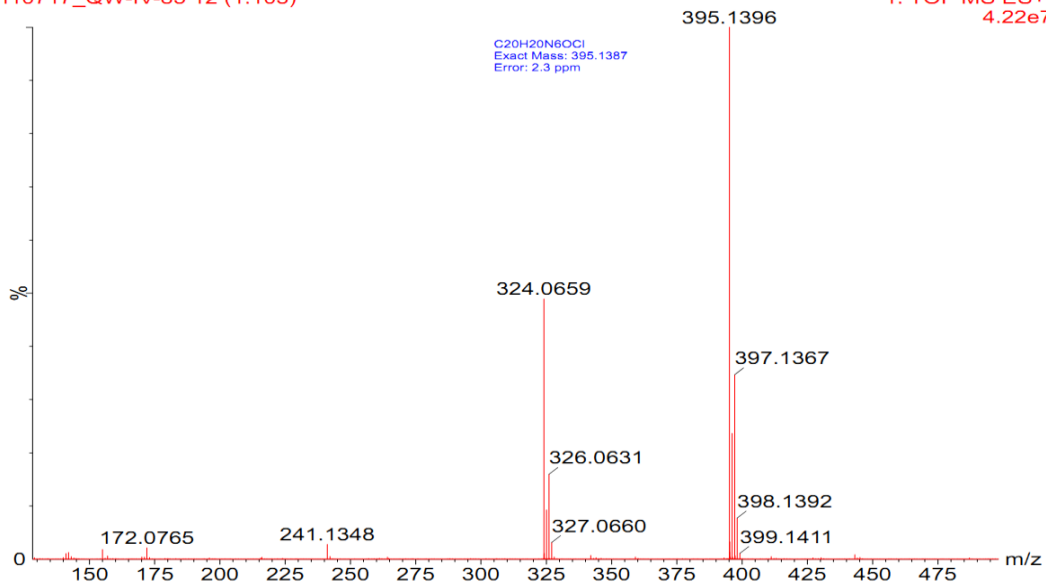

### HR-MS of 2c

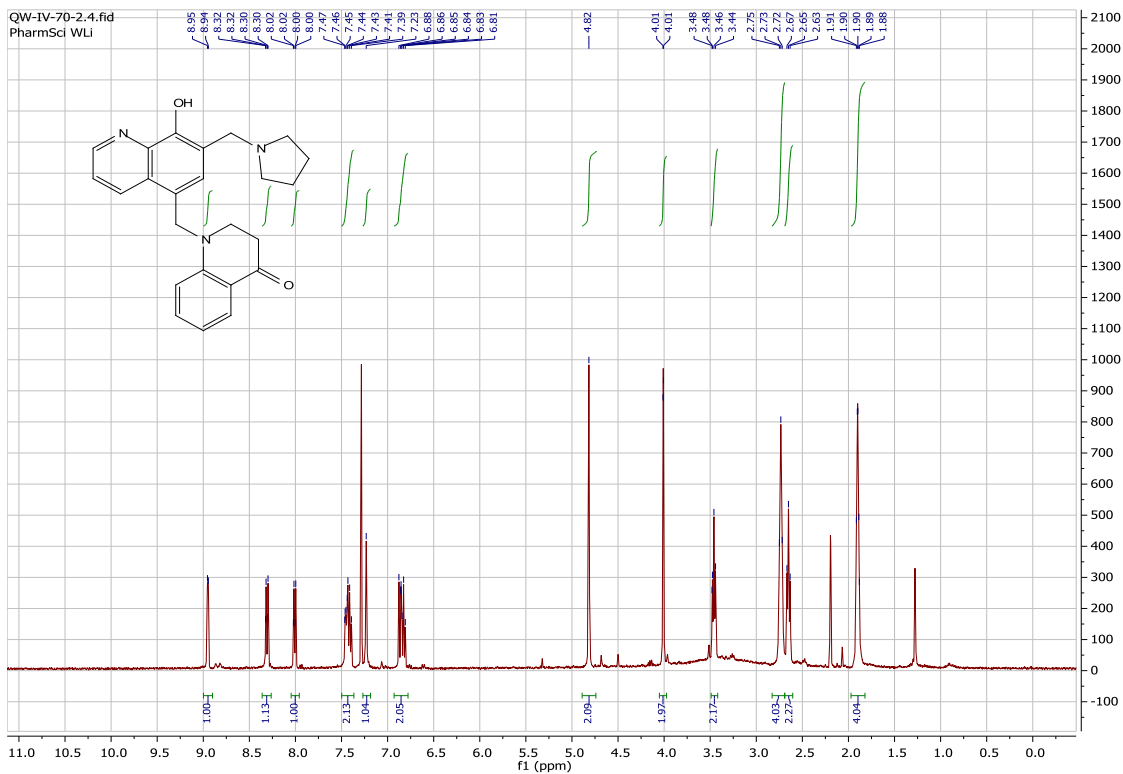

### <sup>1</sup>H-NMR of 2d

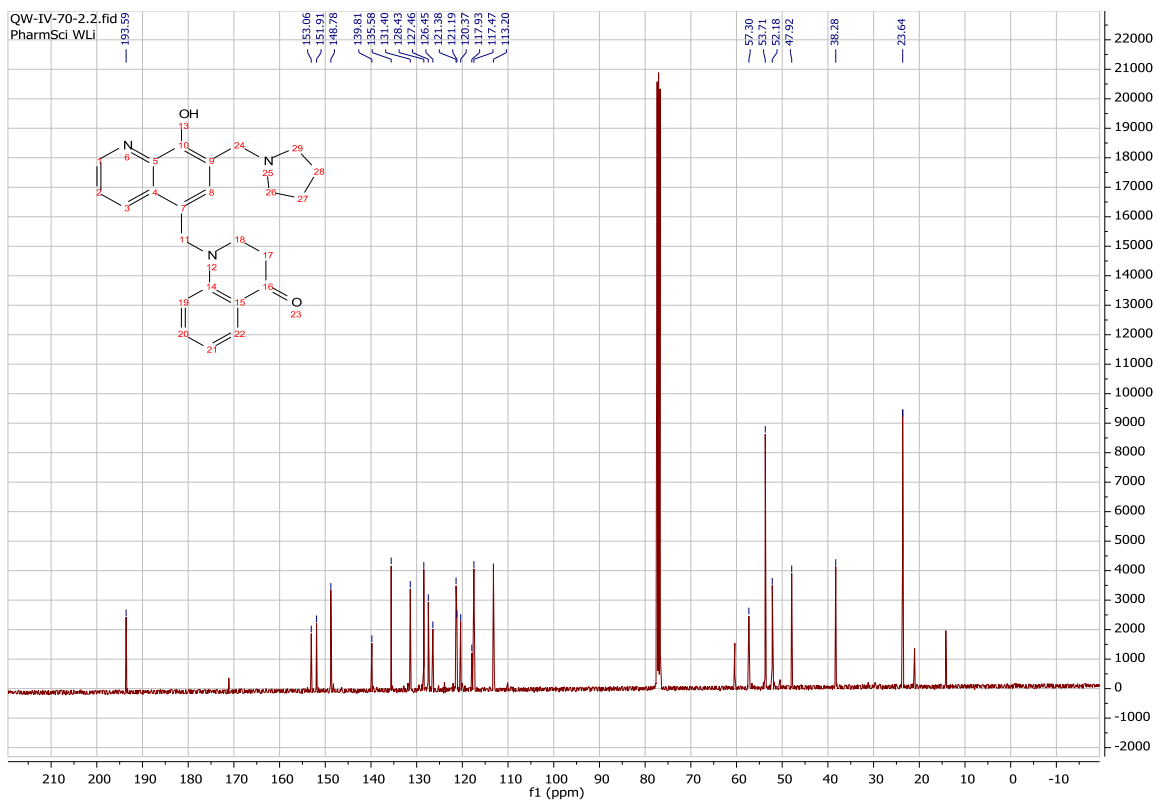

$^{13}\text{C-NMR}$  of **2d**

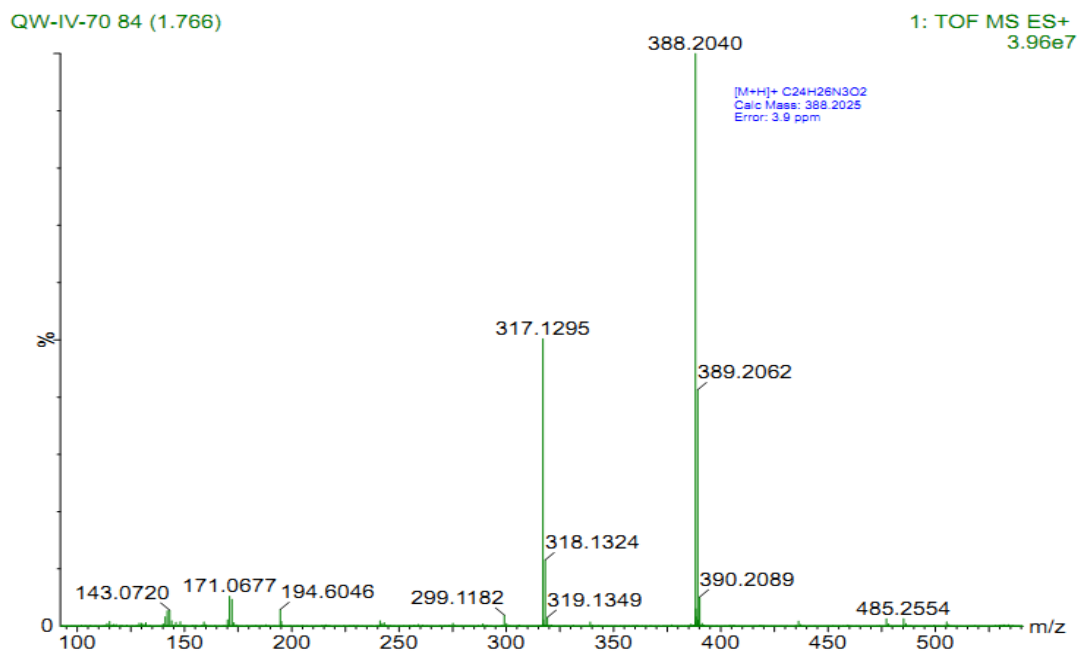

HR-MS of **2d**

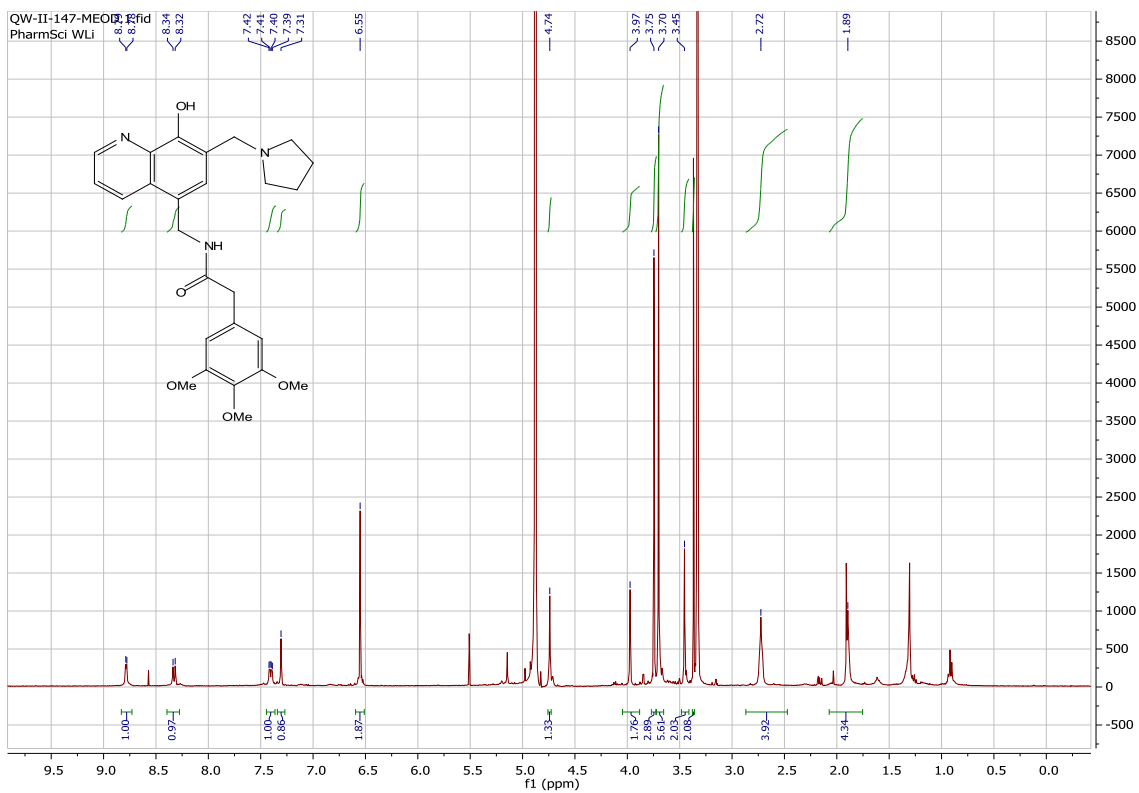

$^1\text{H-NMR}$  of **6a**

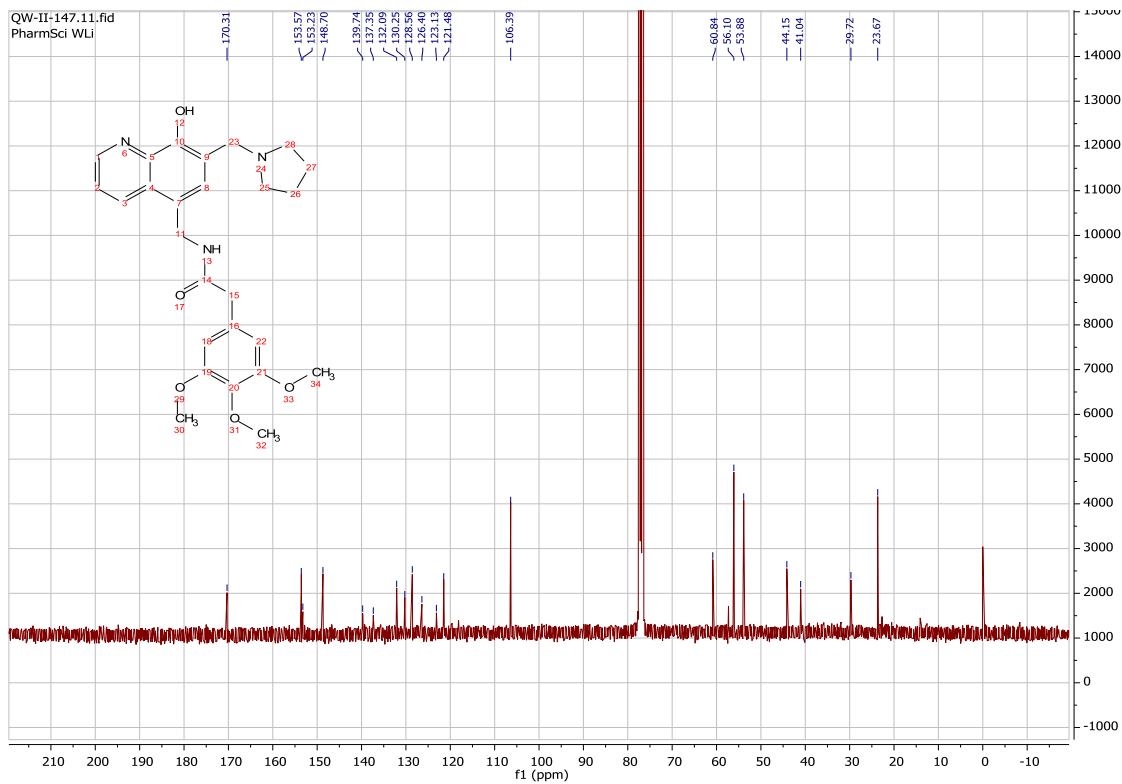

$^{13}\text{C-NMR}$  of **6a**

QW-II-147 41 (1.374)

1: TOF MS ES+  
1.20e7

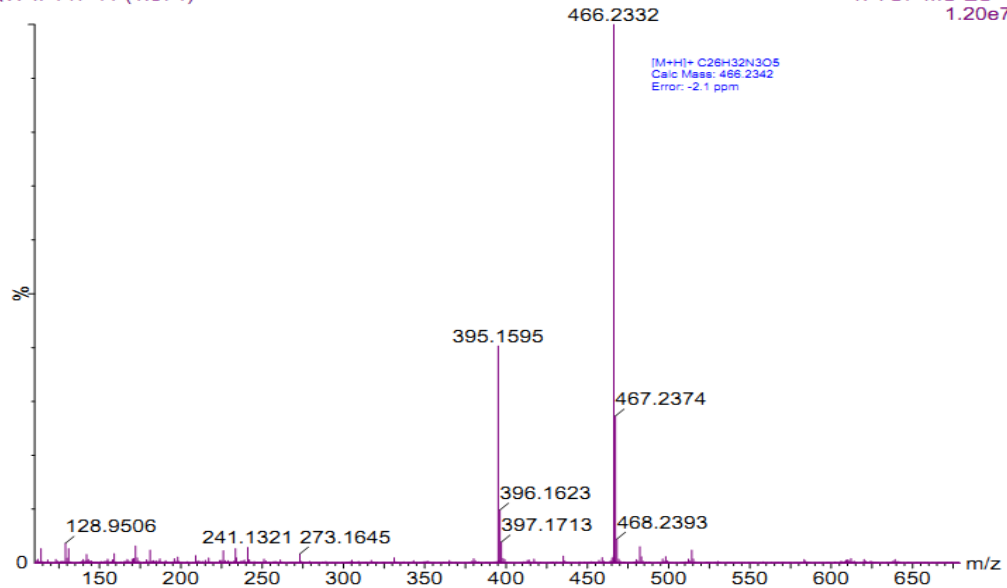

### HR-MS of 6a

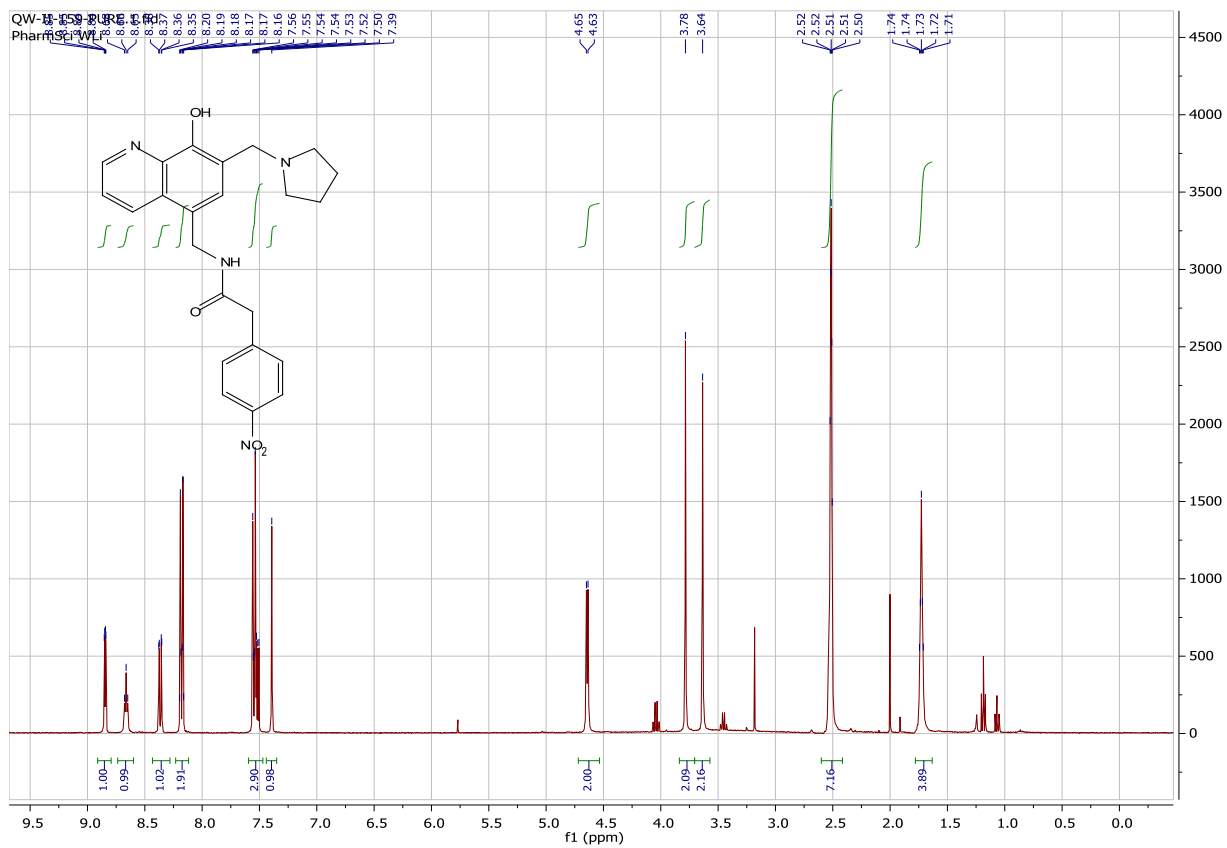

### <sup>1</sup>H-NMR of 6b

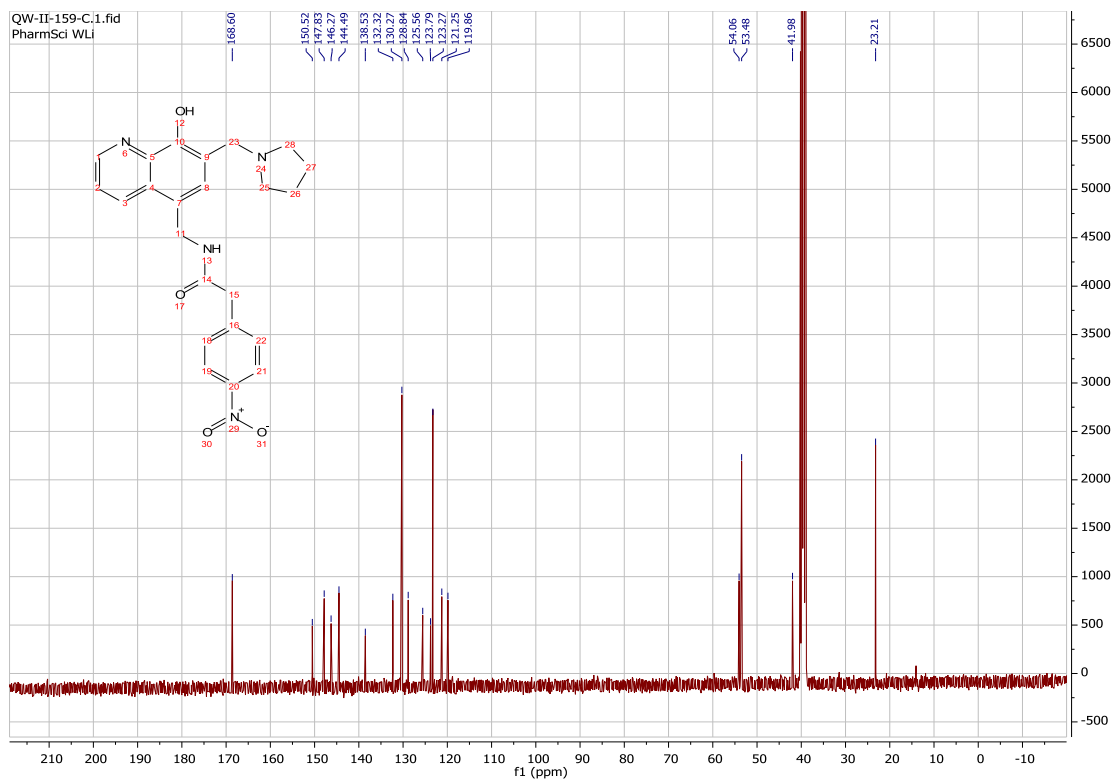

$^{13}\text{C}$ -NMR of **6b**

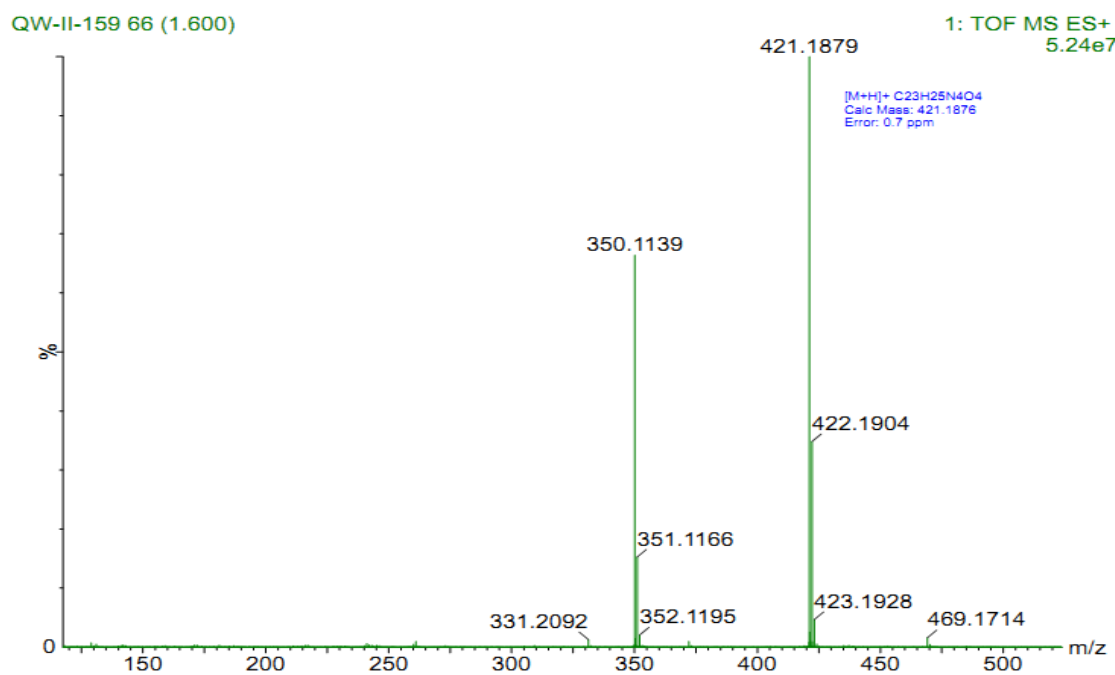

HR-MS of **6b**

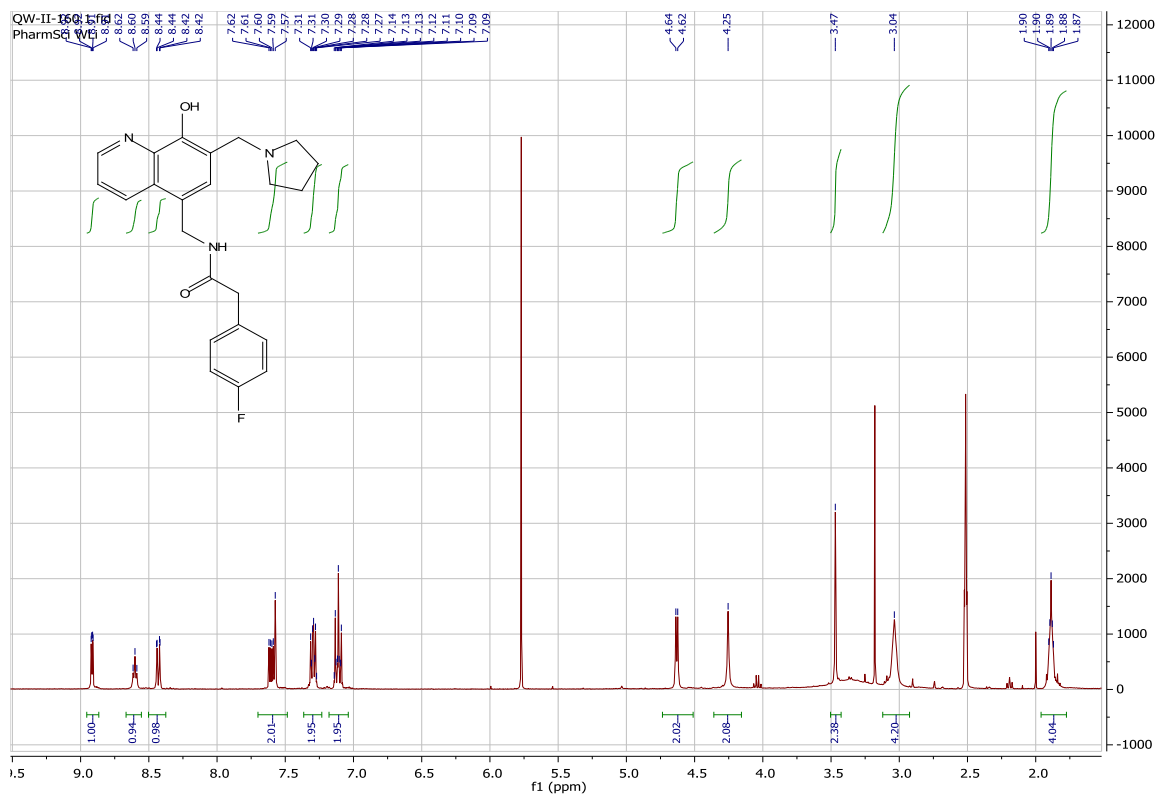

$^1\text{H-NMR}$  of **6c**

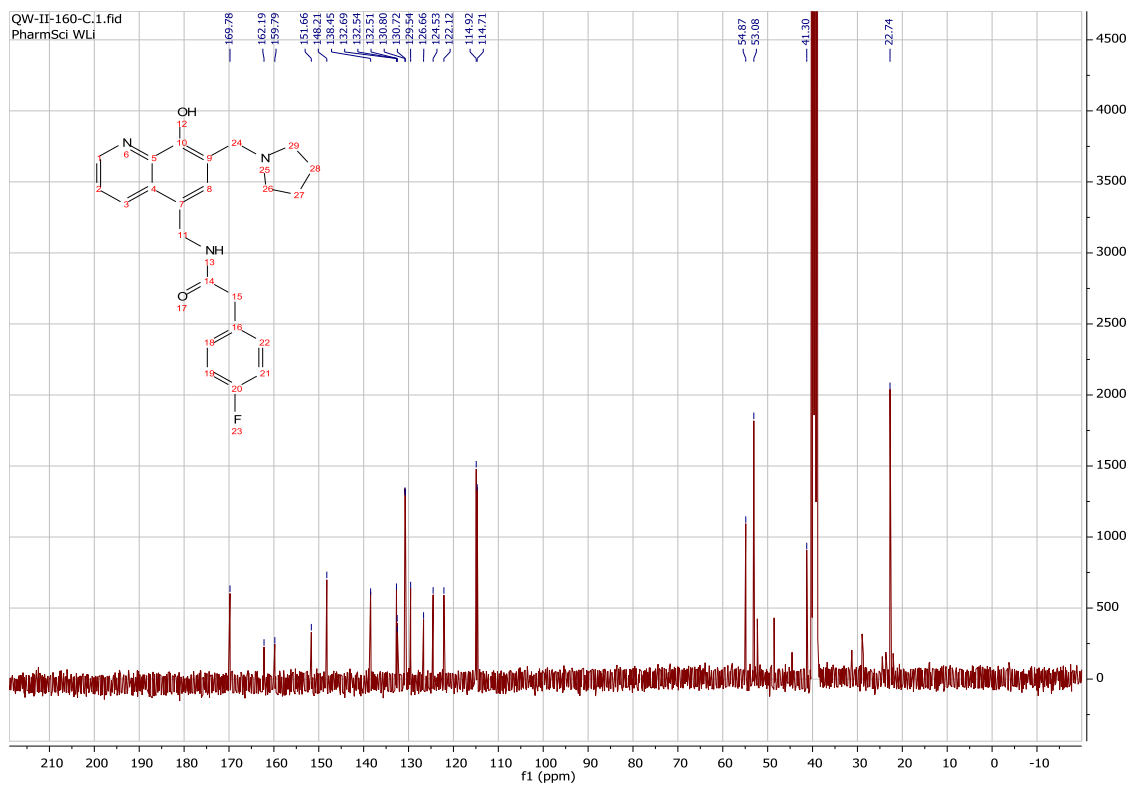

$^{13}\text{C-NMR}$  of **6c**



QW-II-160 63 (1.574)

1: TOF MS ES+  
5.80e7

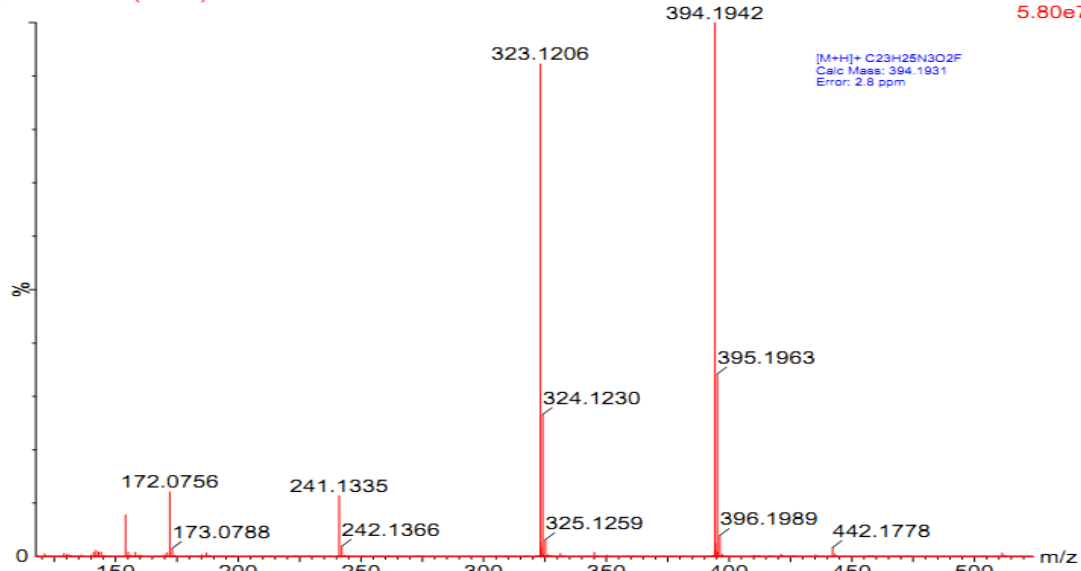

[M+H]<sup>+</sup> C<sub>23</sub>H<sub>25</sub>N<sub>3</sub>O<sub>2</sub>F  
Calc Mass: 394.1931  
Error: 2.8 ppm

### HR-MS of 6c

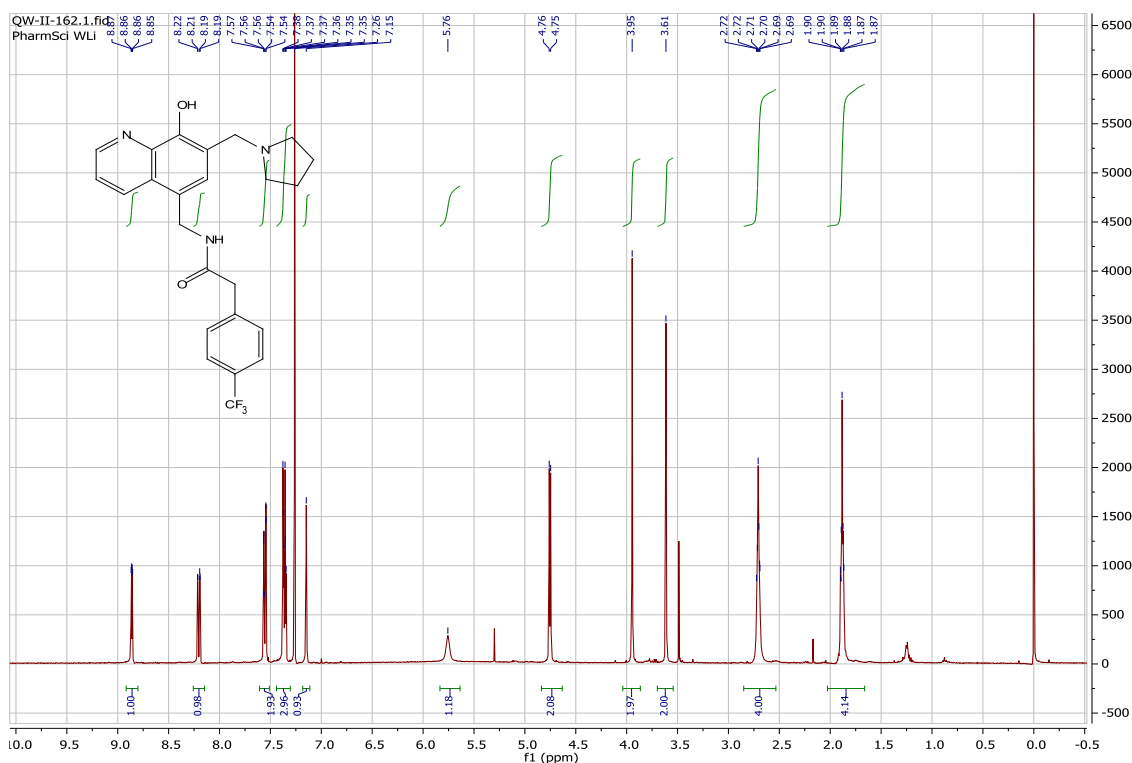

### <sup>1</sup>H-NMR of 6d

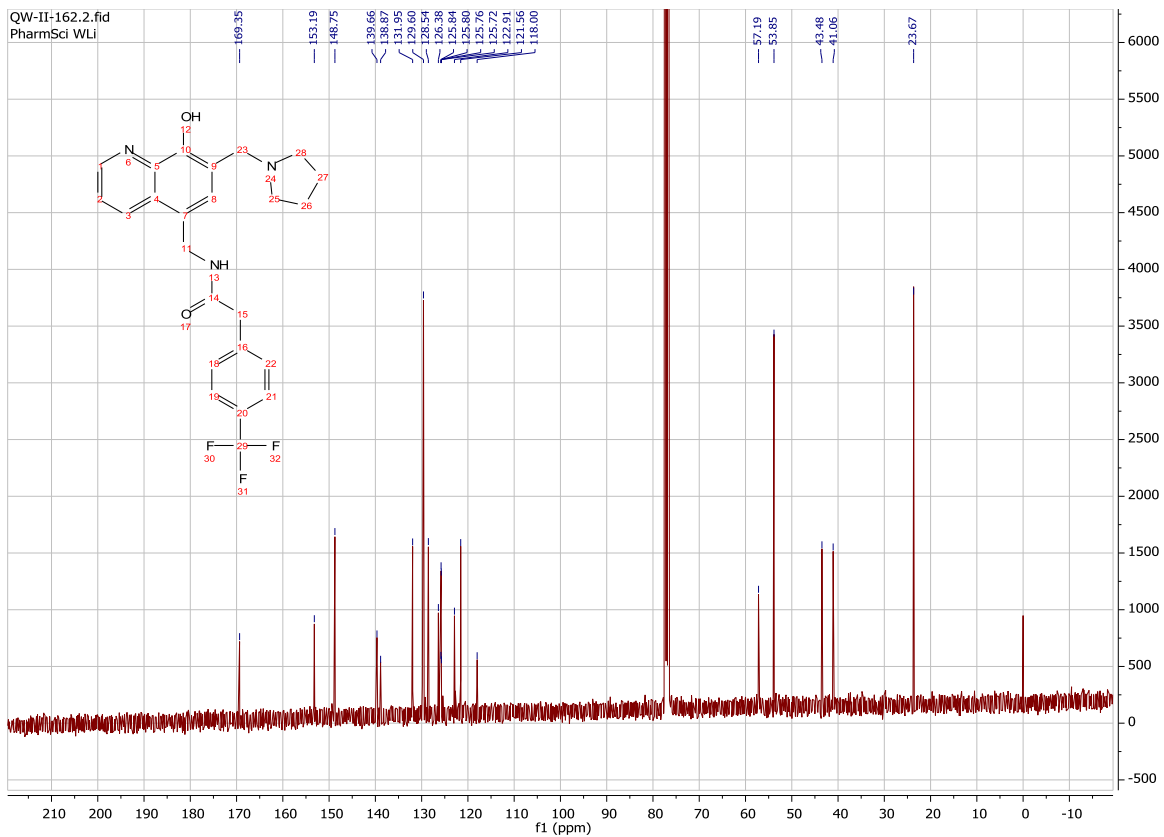

$^{13}\text{C-NMR}$  of 6d

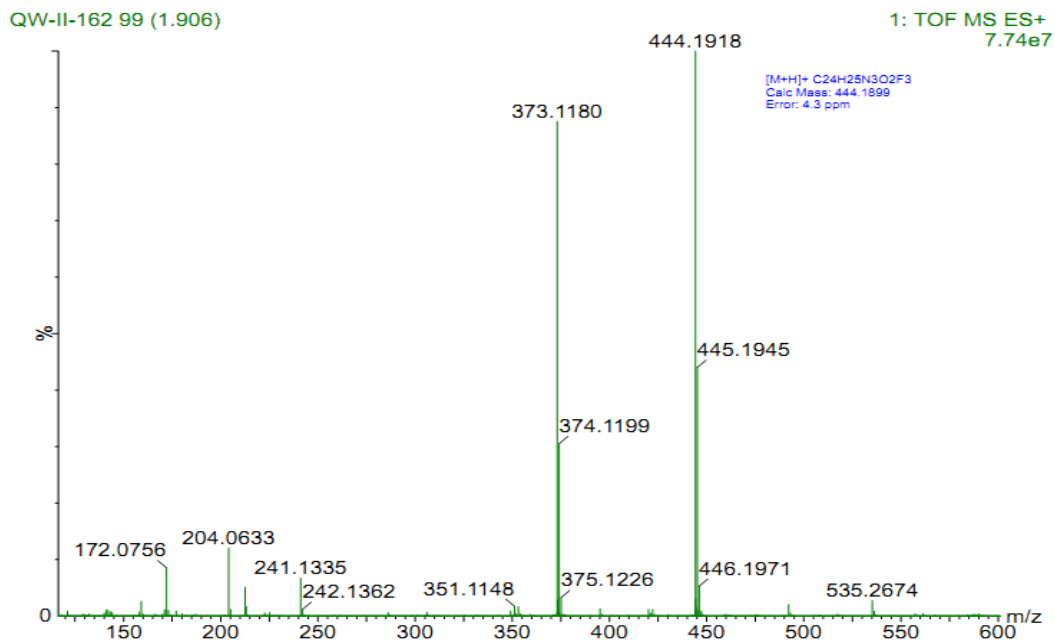

HR-MS of 6d

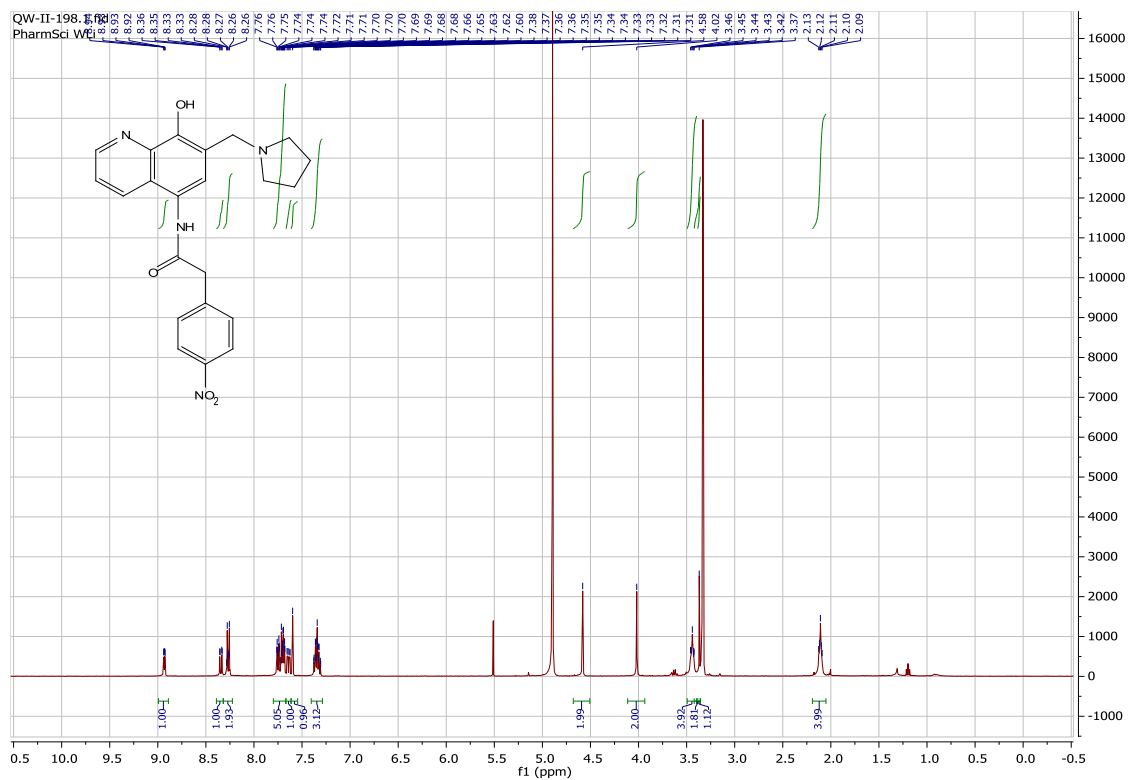

$^1\text{H-NMR}$  of **6e**

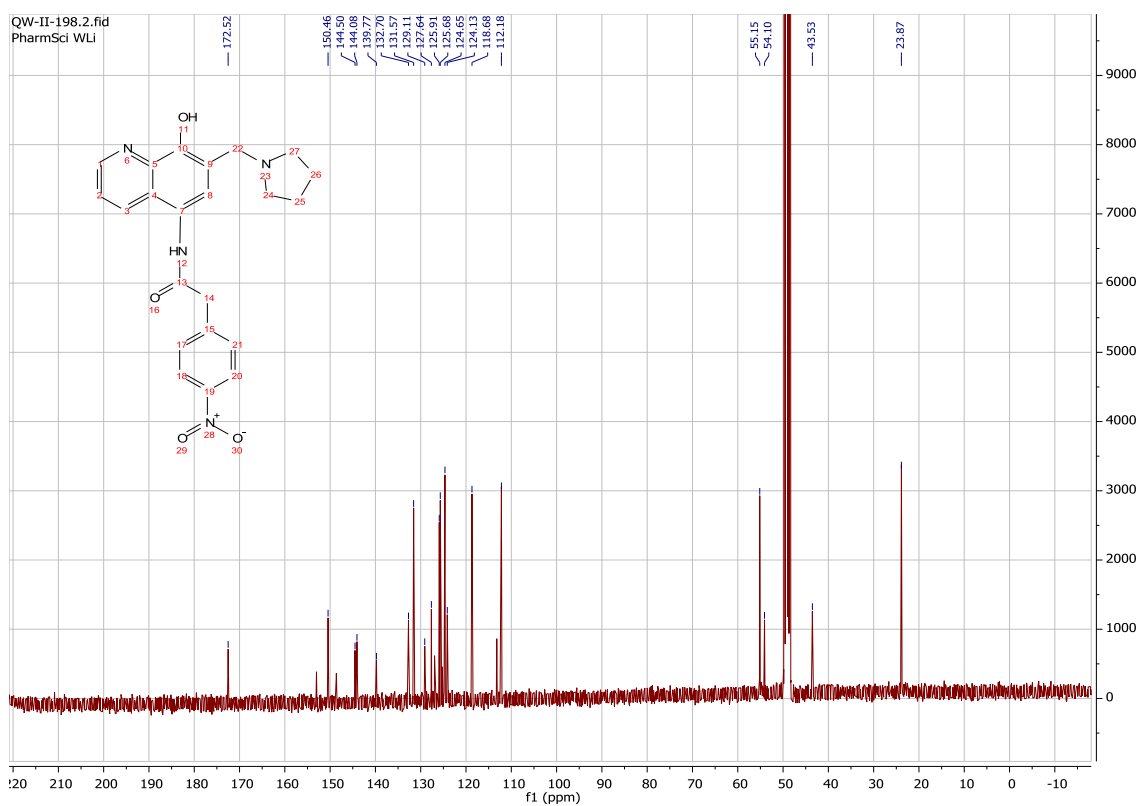

$^{13}\text{C-NMR}$  of **6e**

S110717\_QW-II-198 62 (1.566)

1: TOF MS ES+  
3.13e7

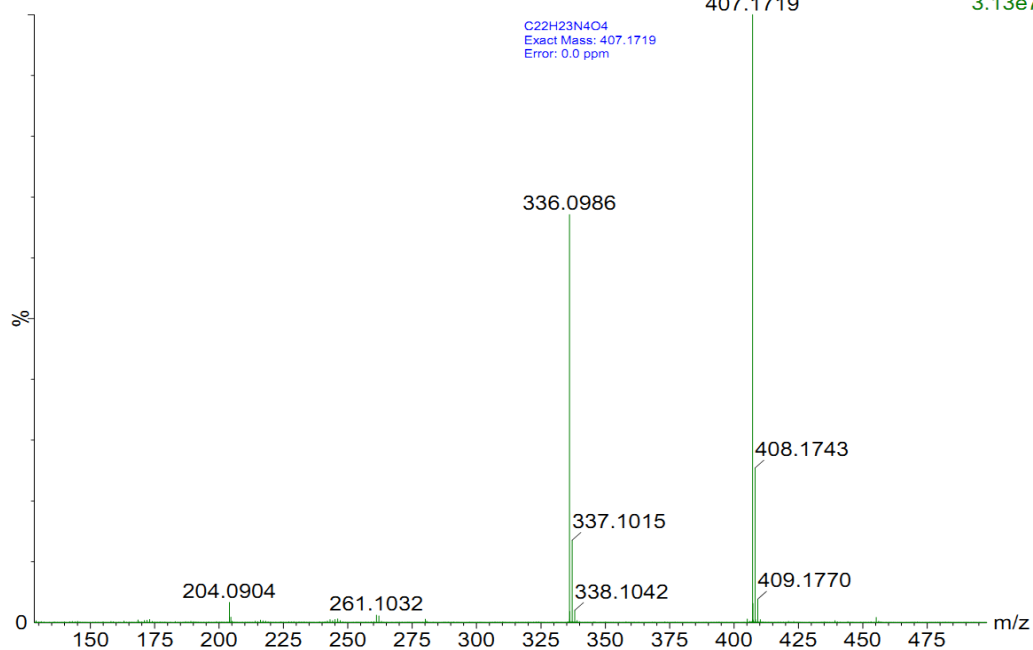

### HR-MS of 6e

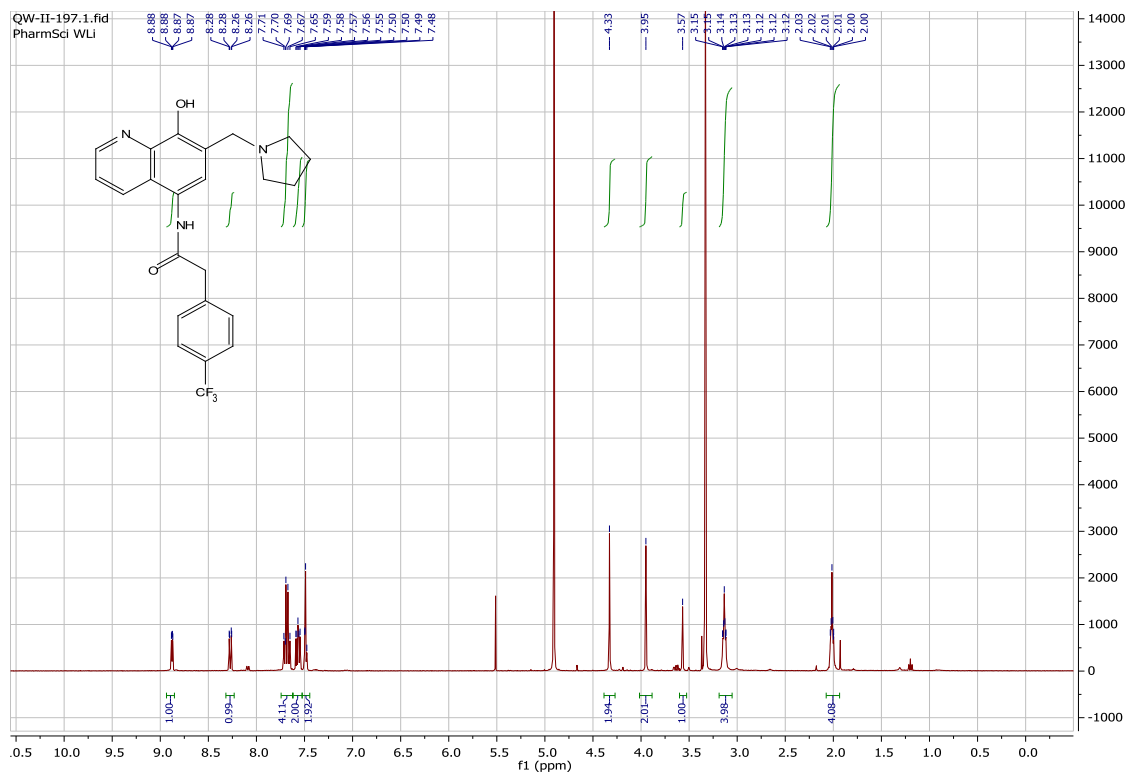

### <sup>1</sup>H-NMR of 6f

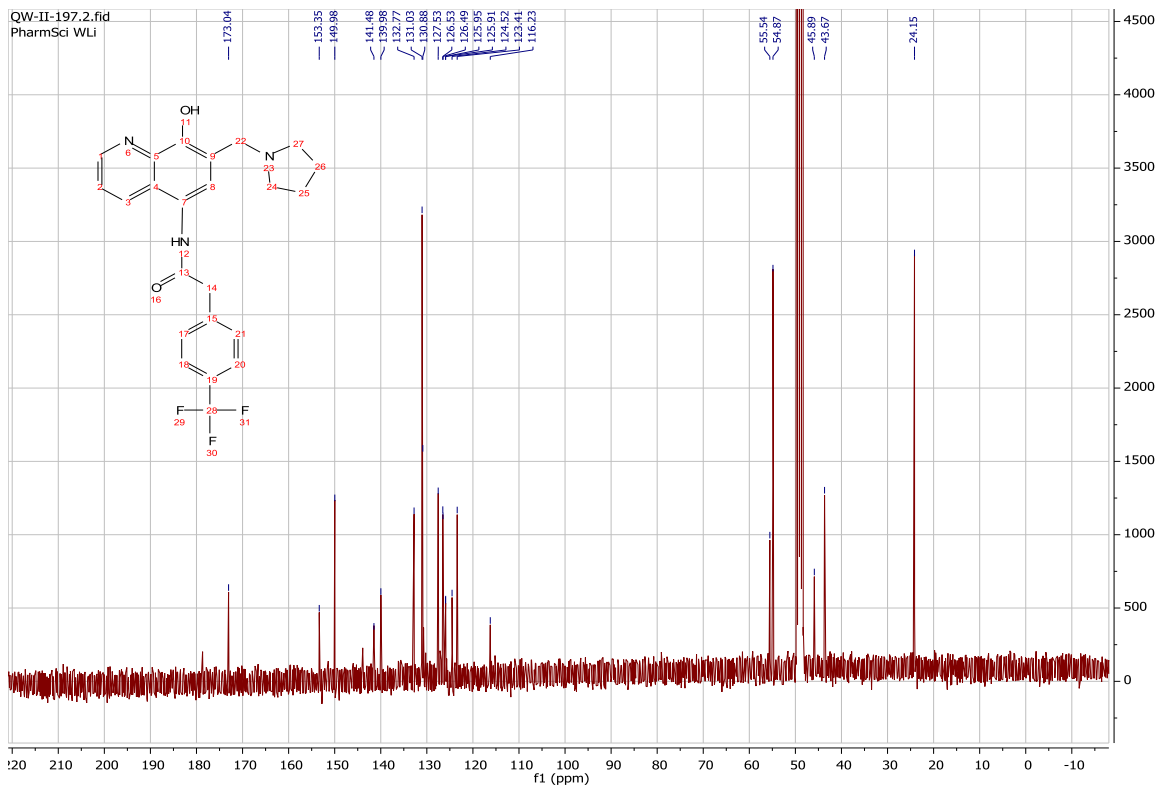

$^{13}\text{C-NMR}$  of **6f**

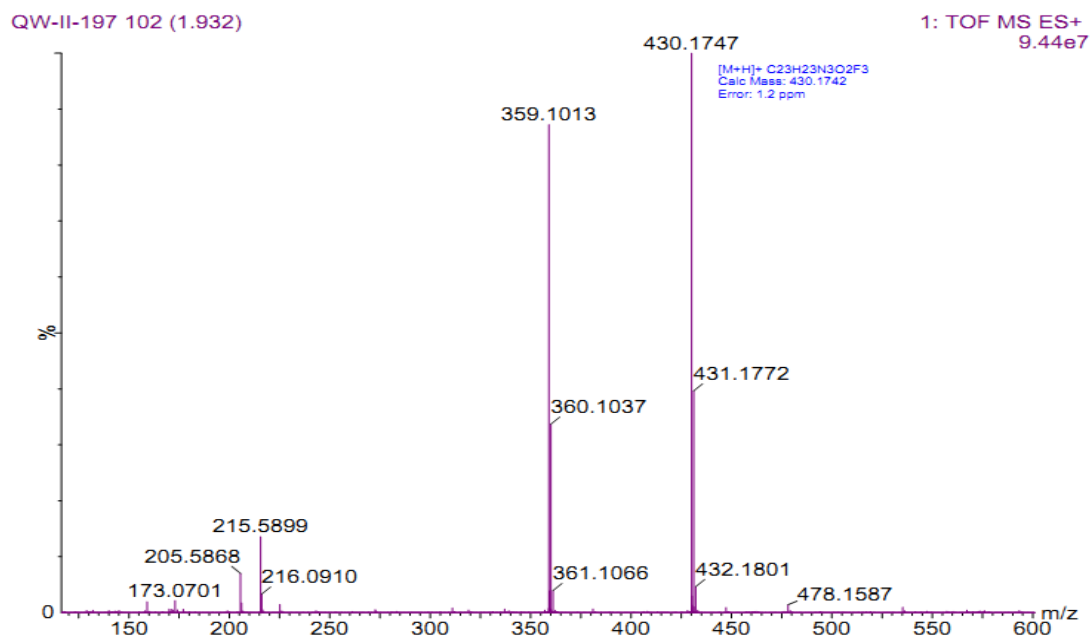

MS of **6f**

HR-

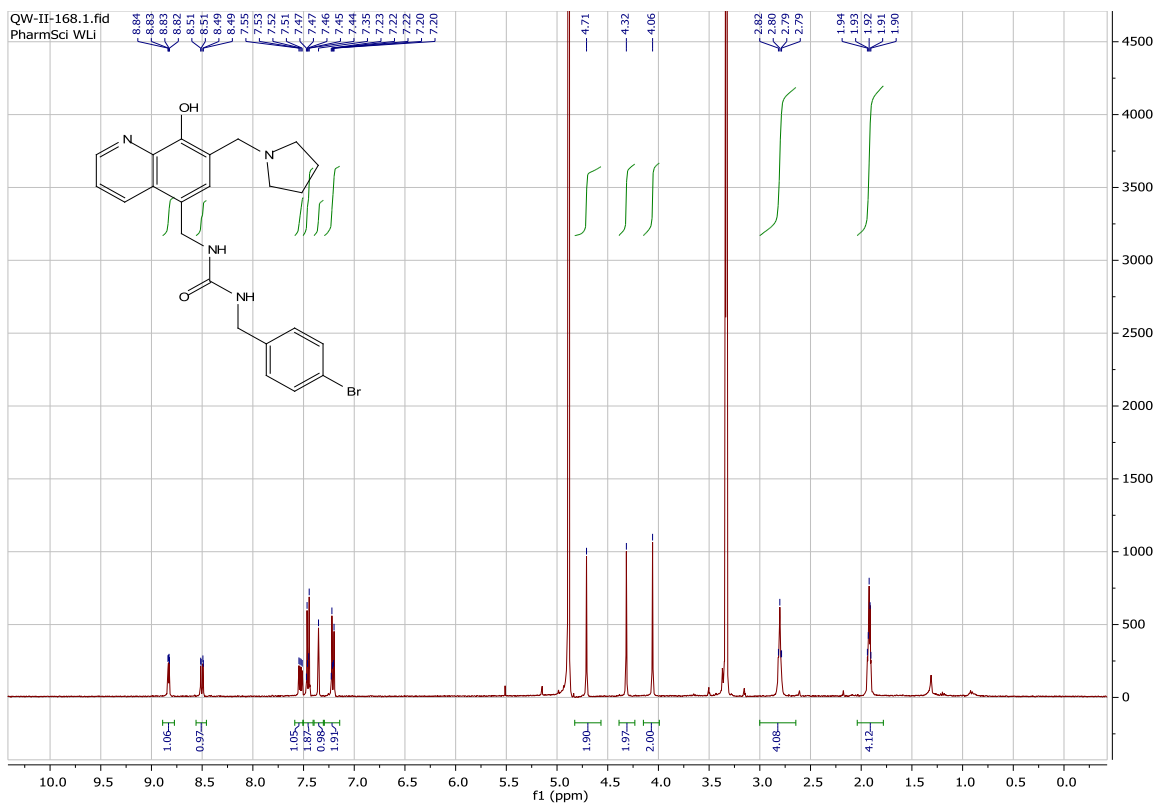

$^1\text{H-NMR}$  of 8

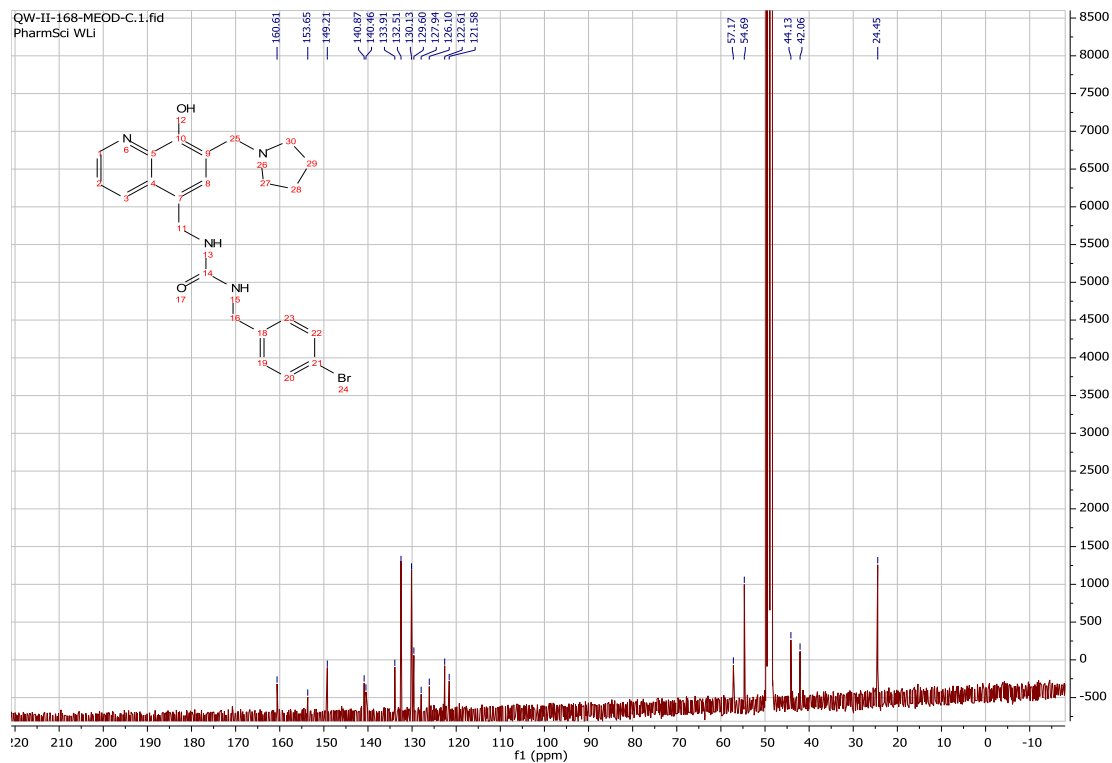

$^{13}\text{C-NMR}$  of 8

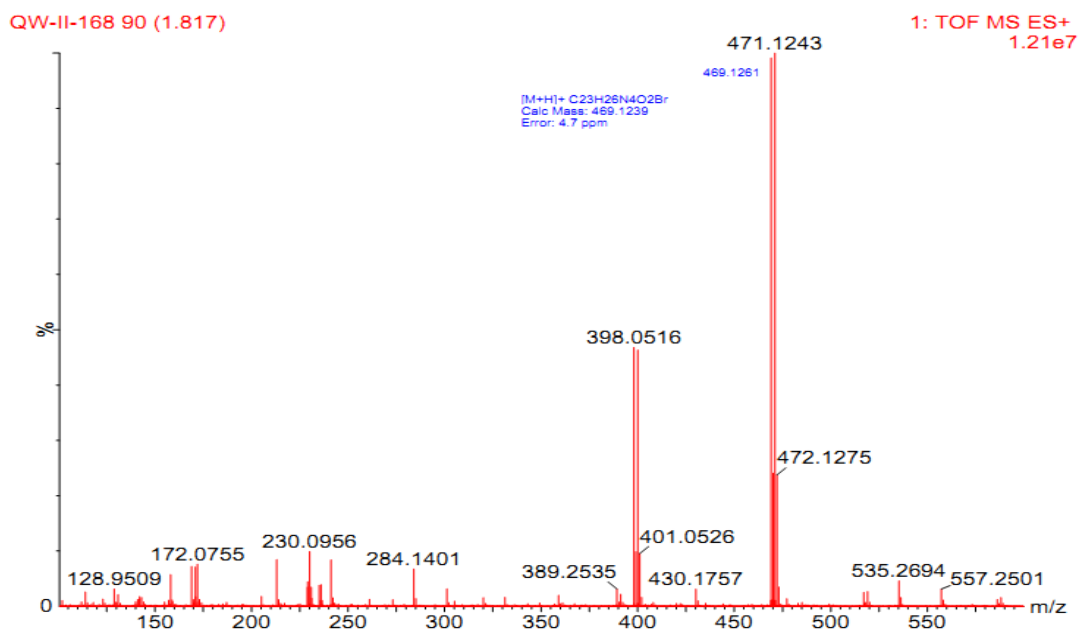

HR-MS of 8

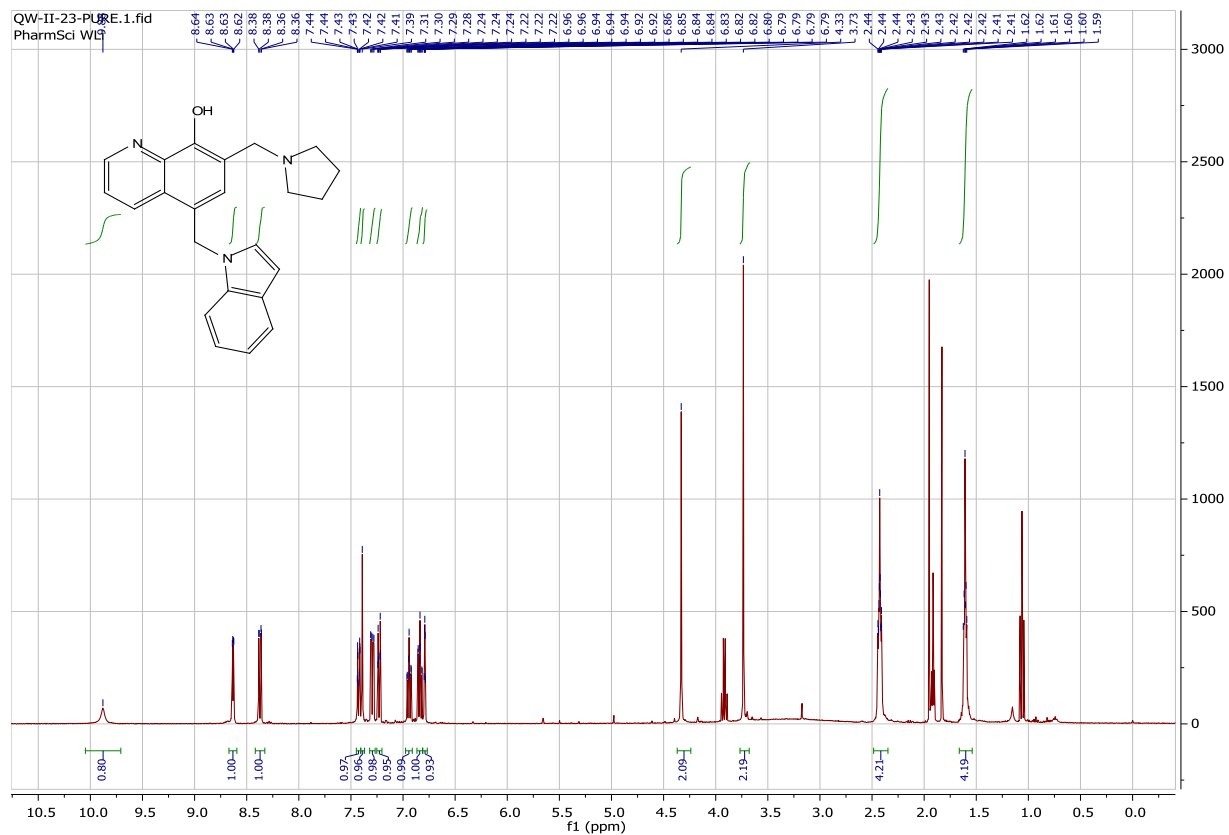

<sup>1</sup>H-NMR of 10a

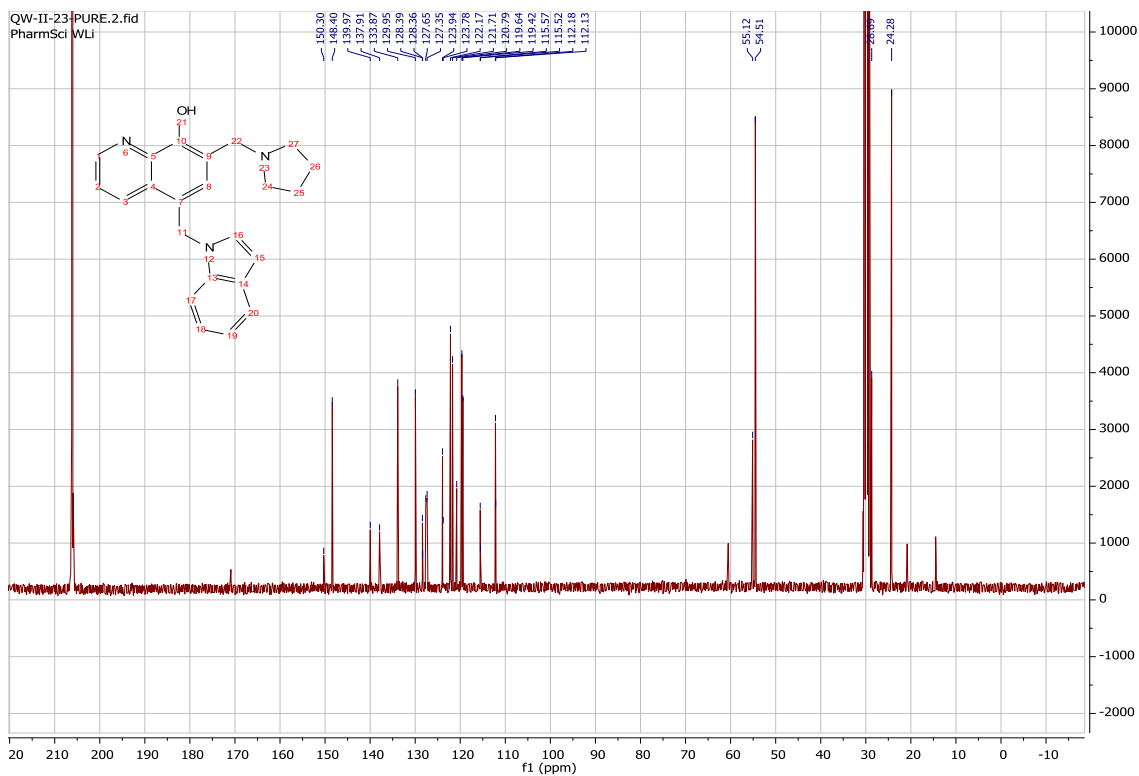

$^{13}\text{C-NMR}$  of **10a**

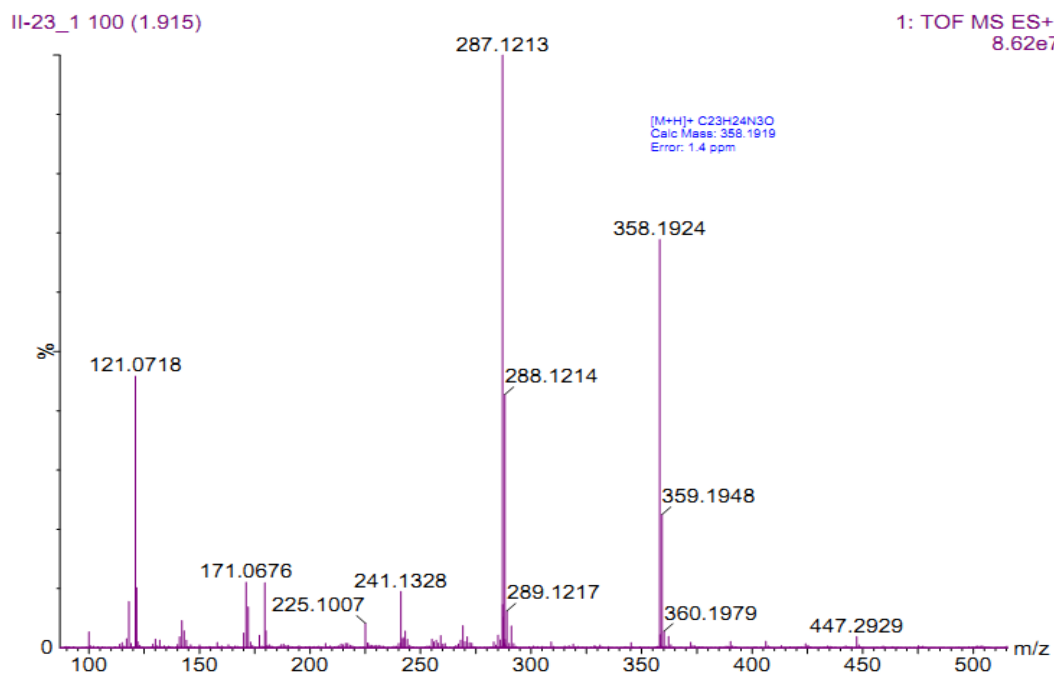

HR-MS of **10a**



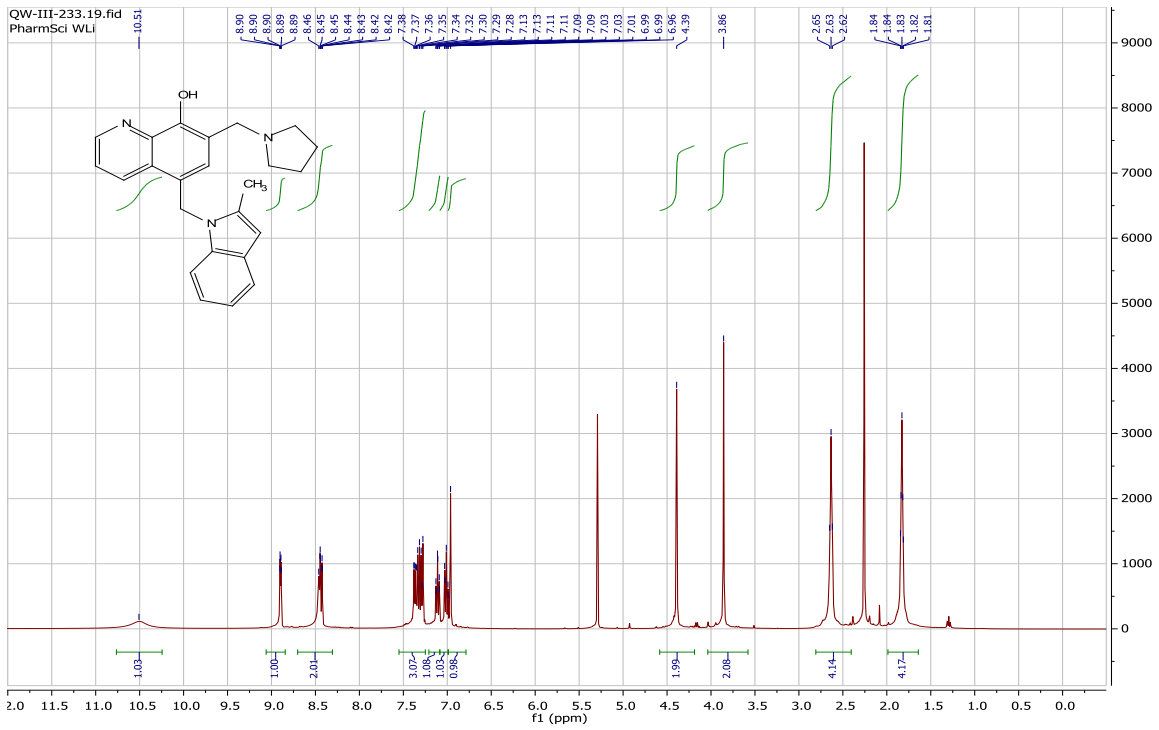

<sup>1</sup>H-NMR of 10b

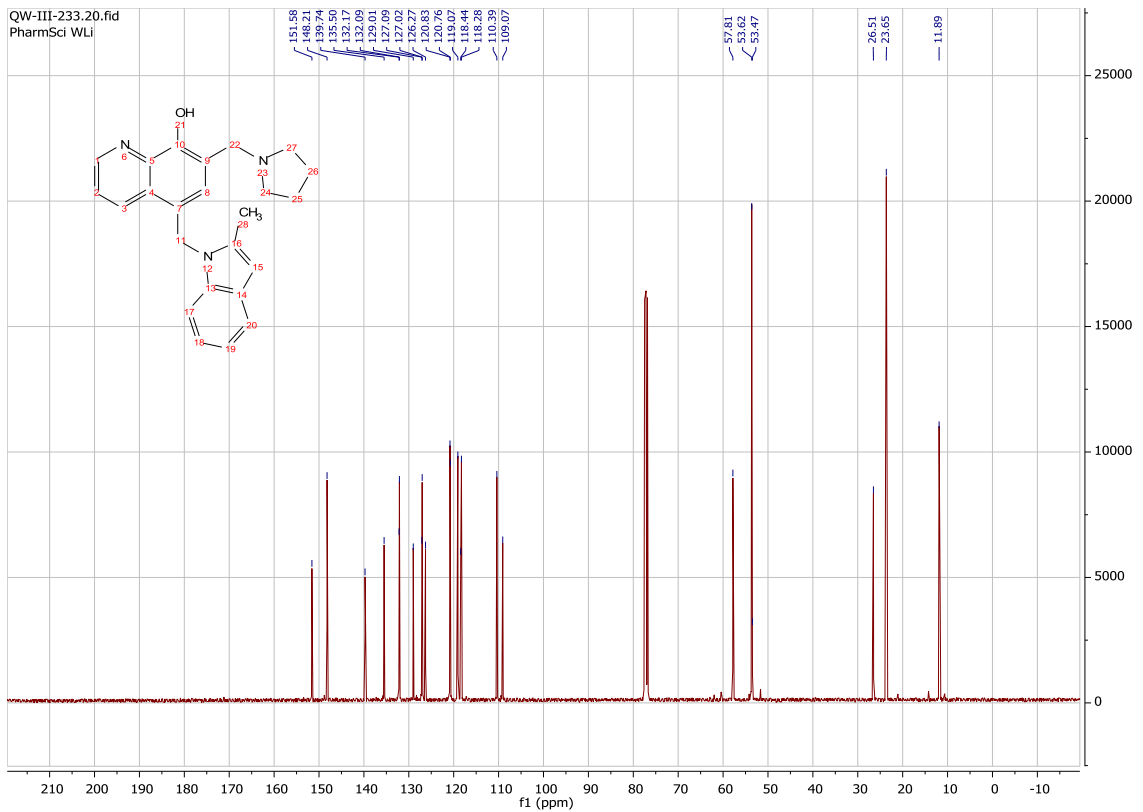

<sup>13</sup>C-NMR of 10b

QW-III-233 109 (2.003)

1: TOF MS ES+  
1.96e7

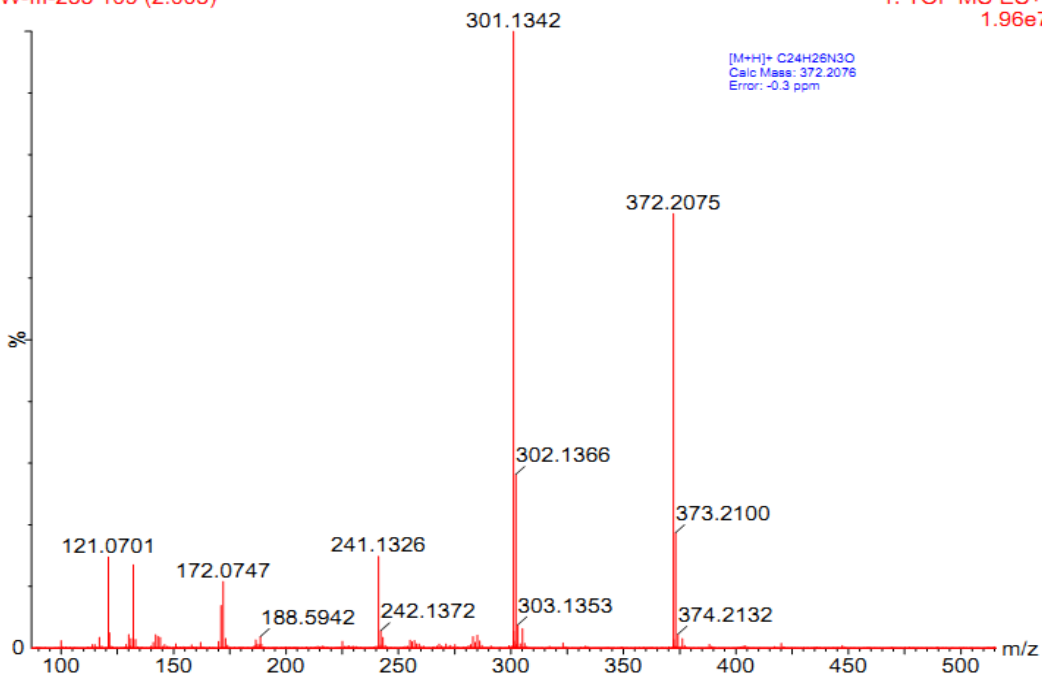

### HR-MS of 10b

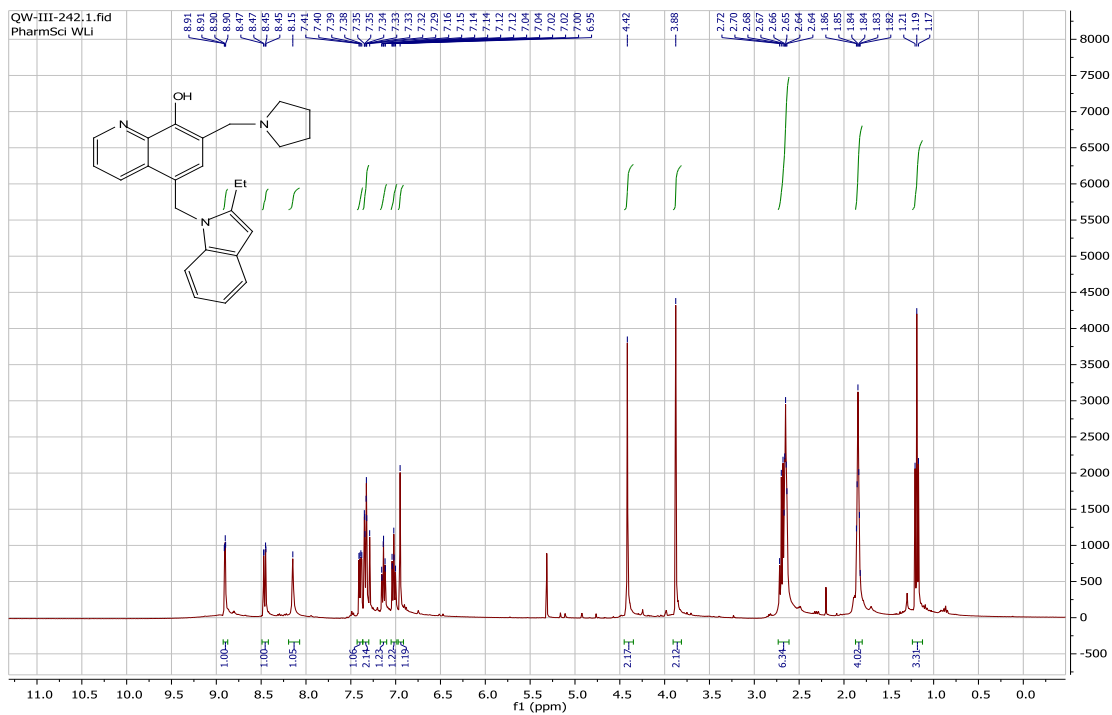

### <sup>1</sup>H-NMR of 10c

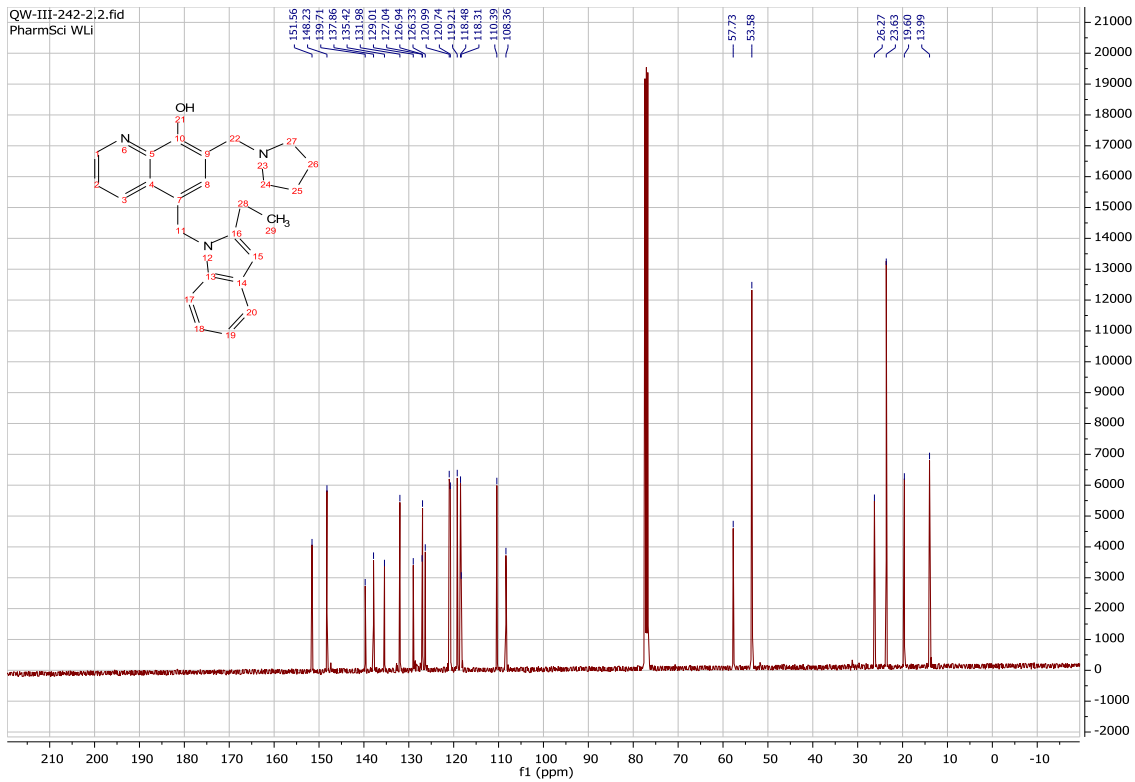

<sup>13</sup>C-NMR of 10c

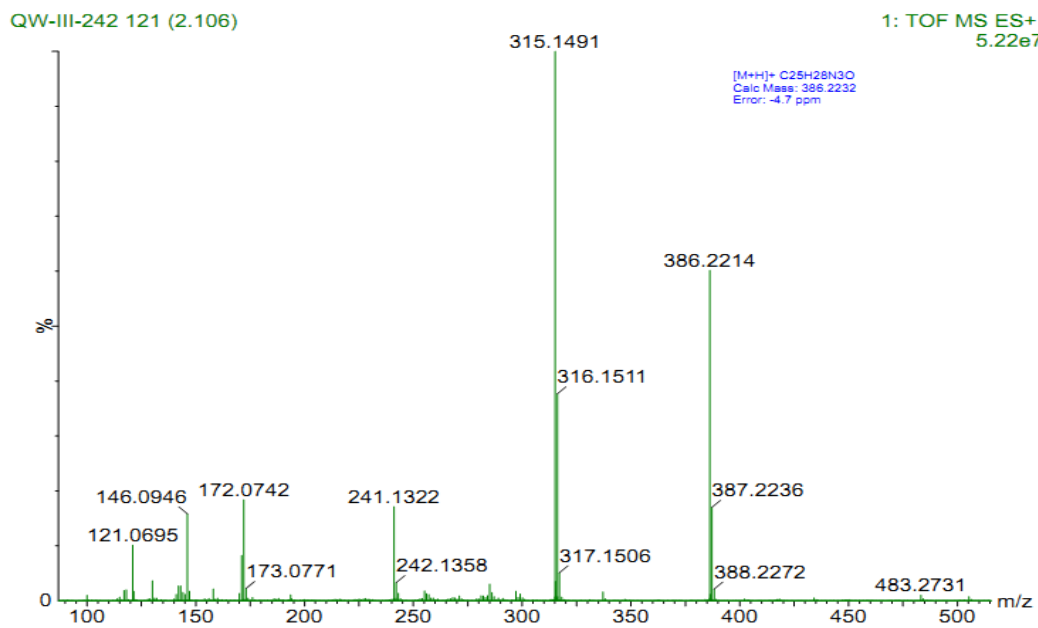

HR-MS of 10c

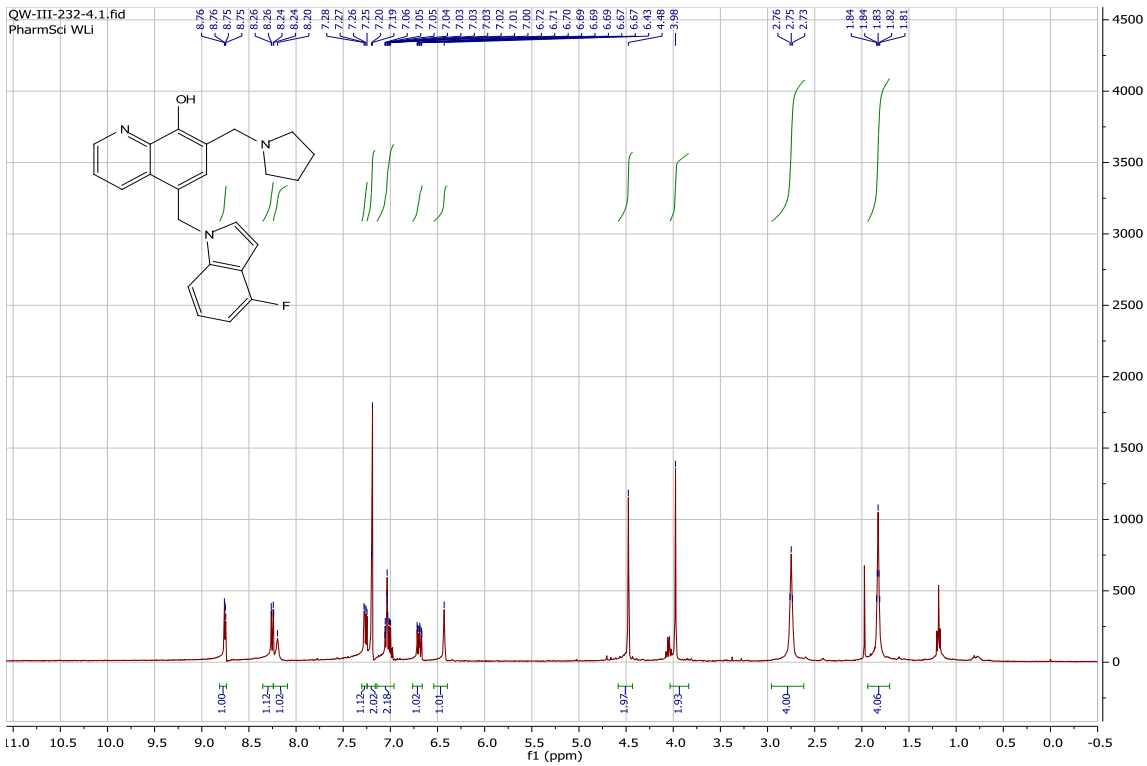

<sup>1</sup>H-NMR of 10d

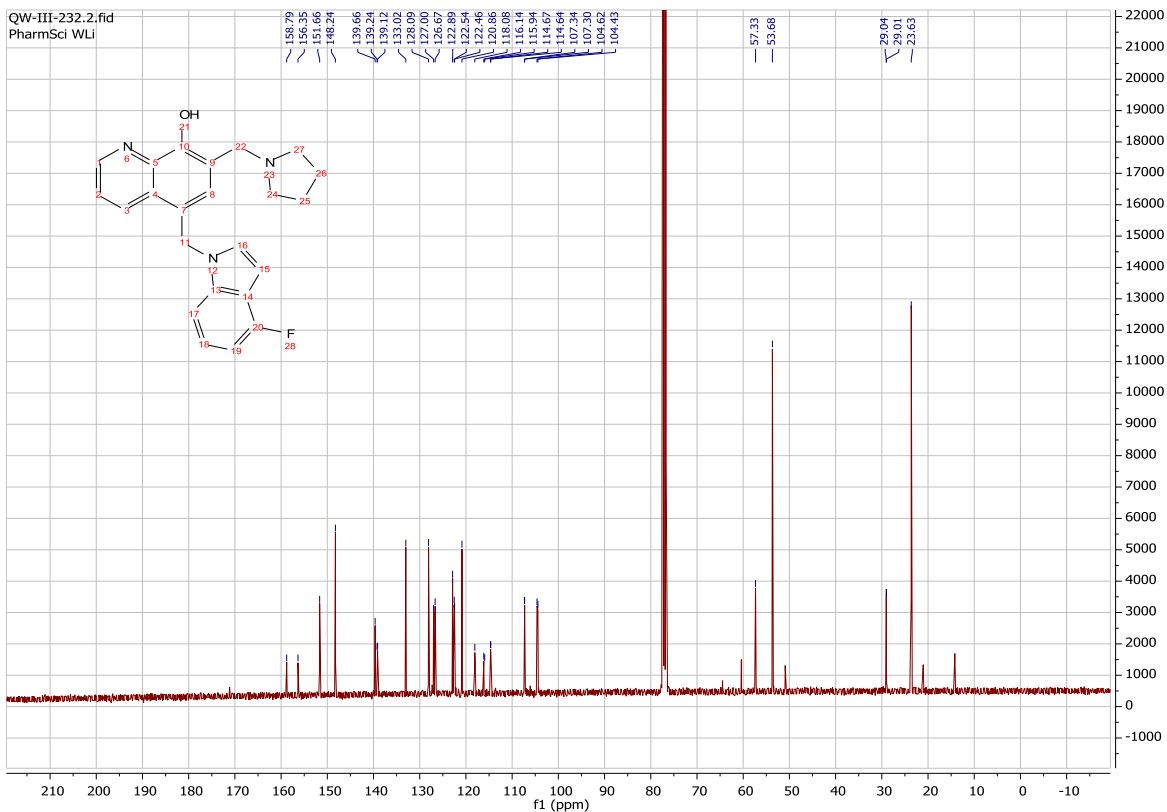

<sup>13</sup>C-NMR of 10d

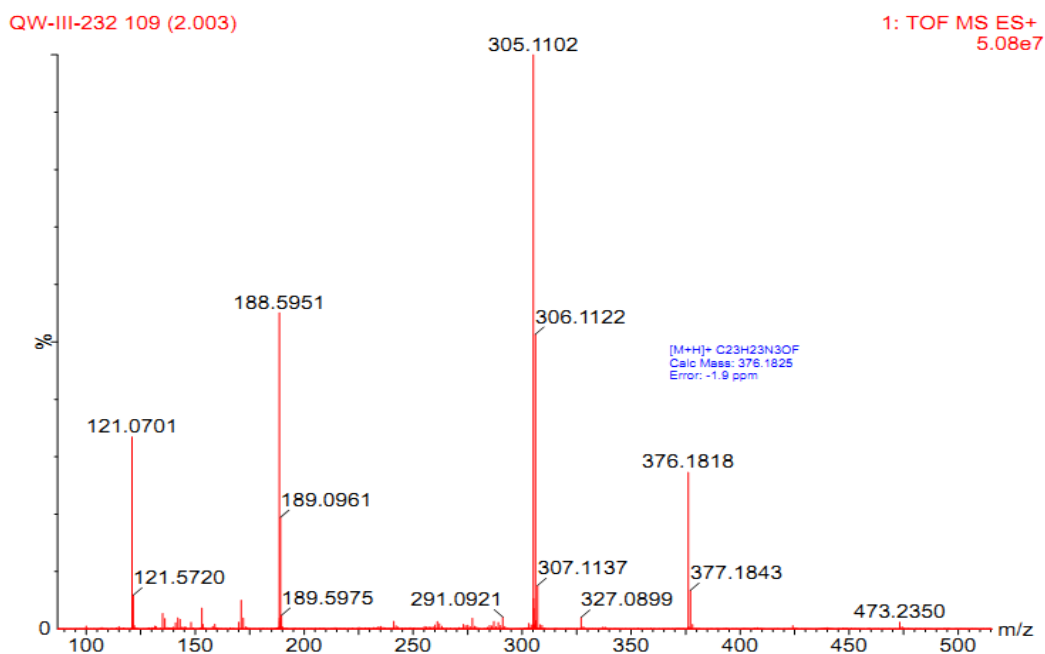

HR-MS of 10d

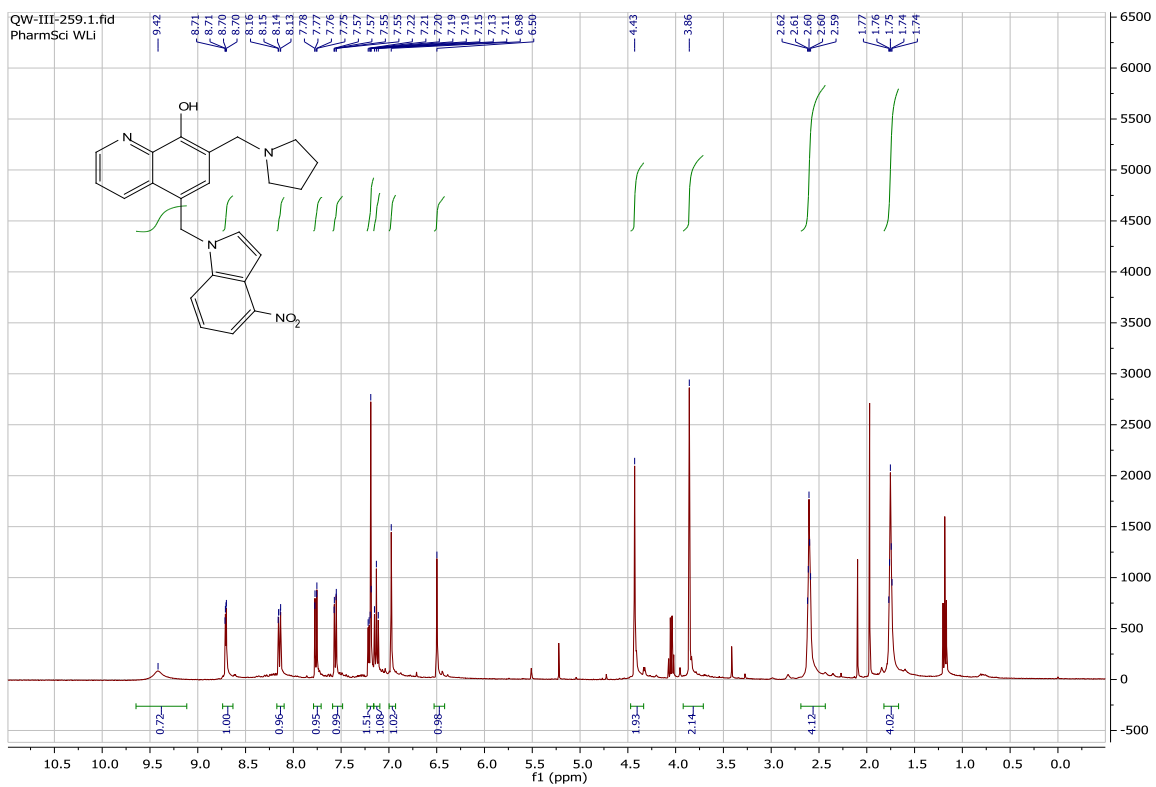

<sup>1</sup>H-NMR of 10e

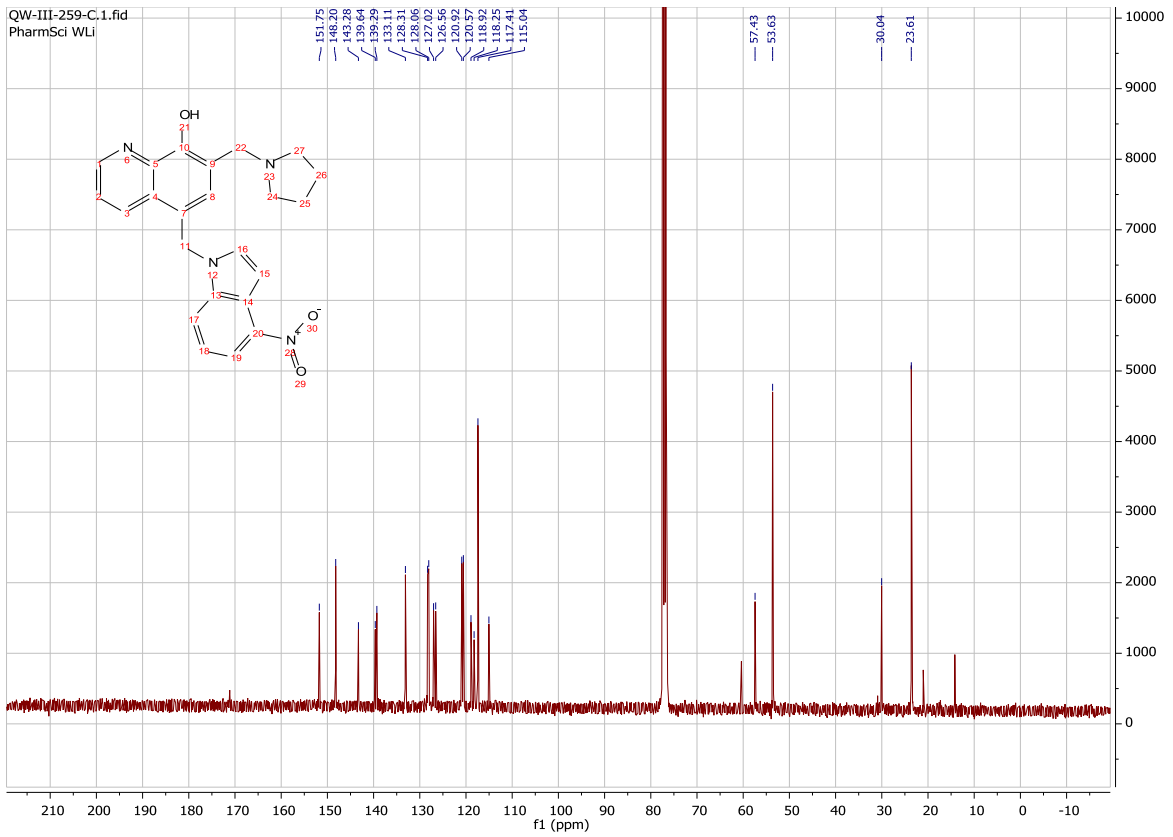

$^{13}\text{C}$ -NMR of 10e

S110717\_QW-III-259 107 (1.975)

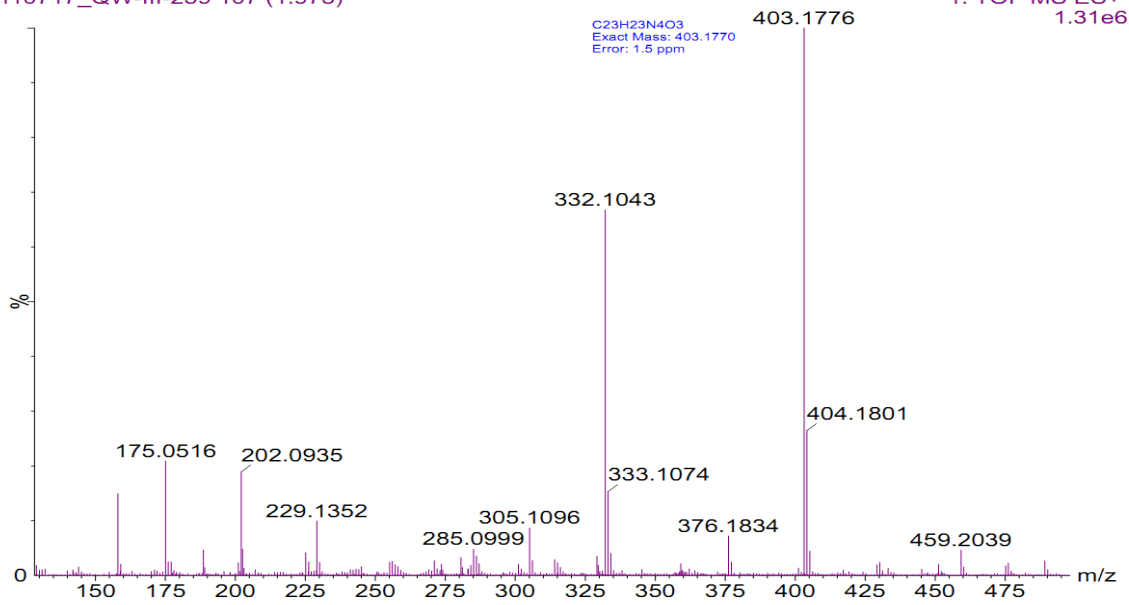

HR-MS of 10e

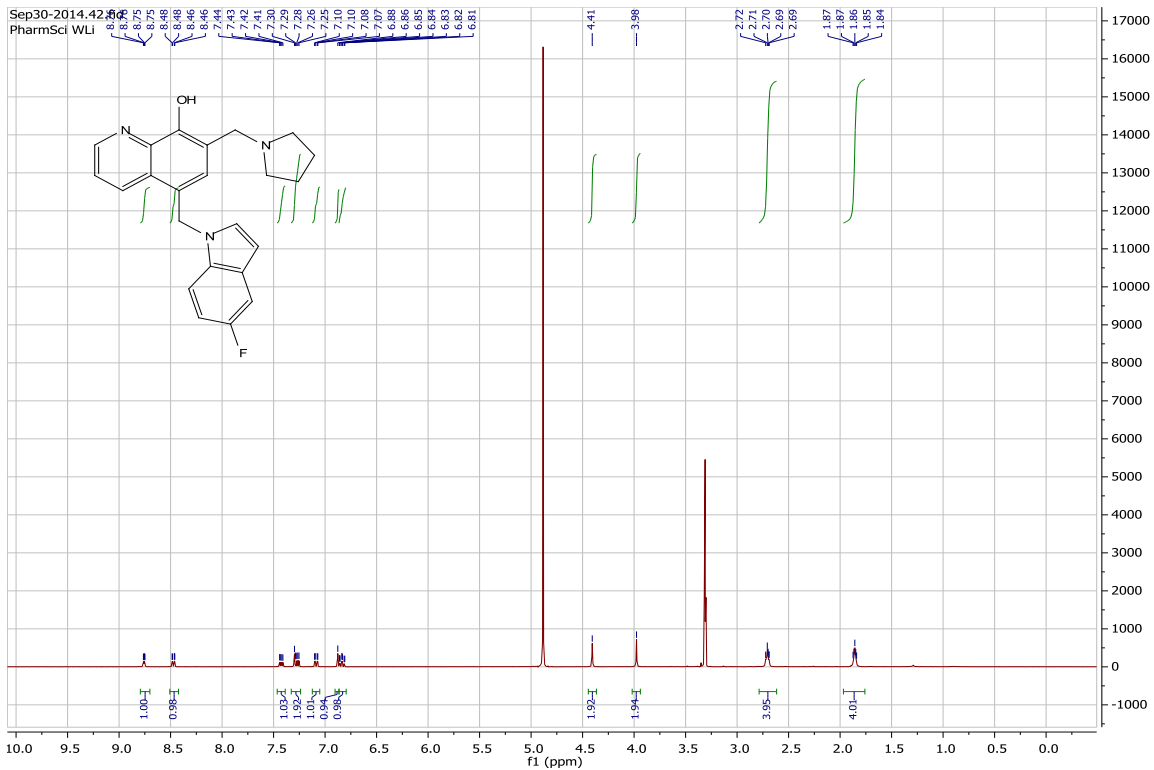

<sup>1</sup>H-NMR of 10f

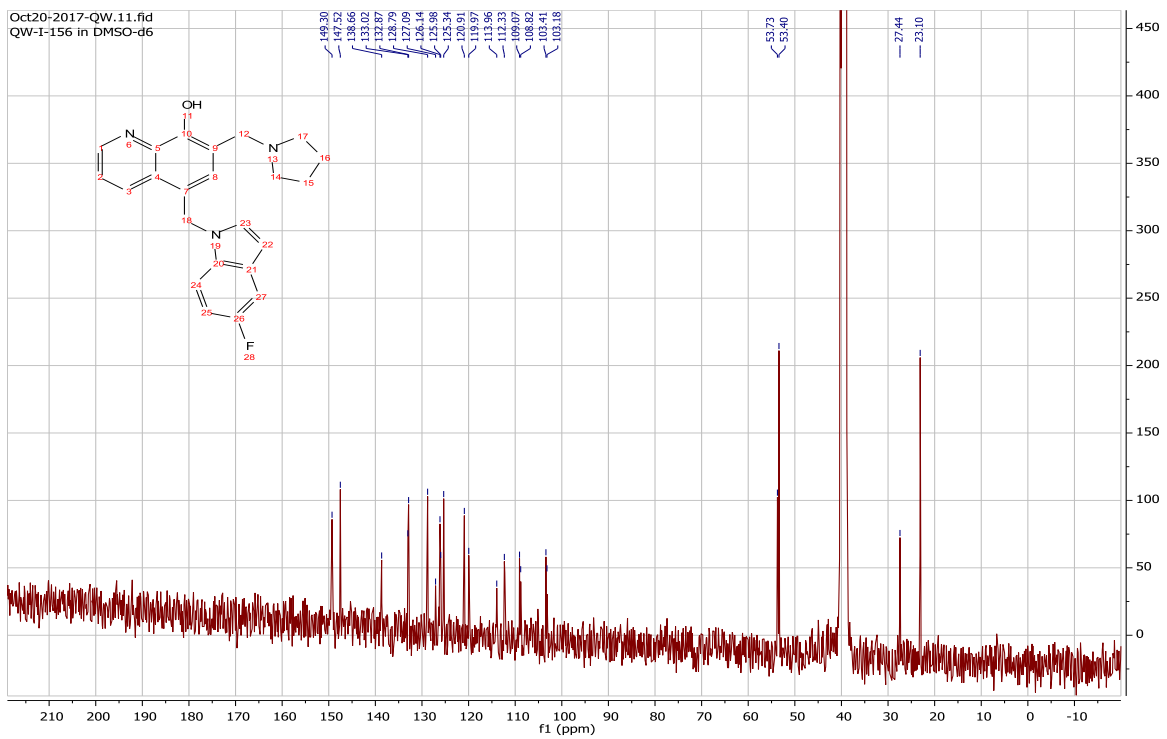

<sup>13</sup>C-NMR of 10f

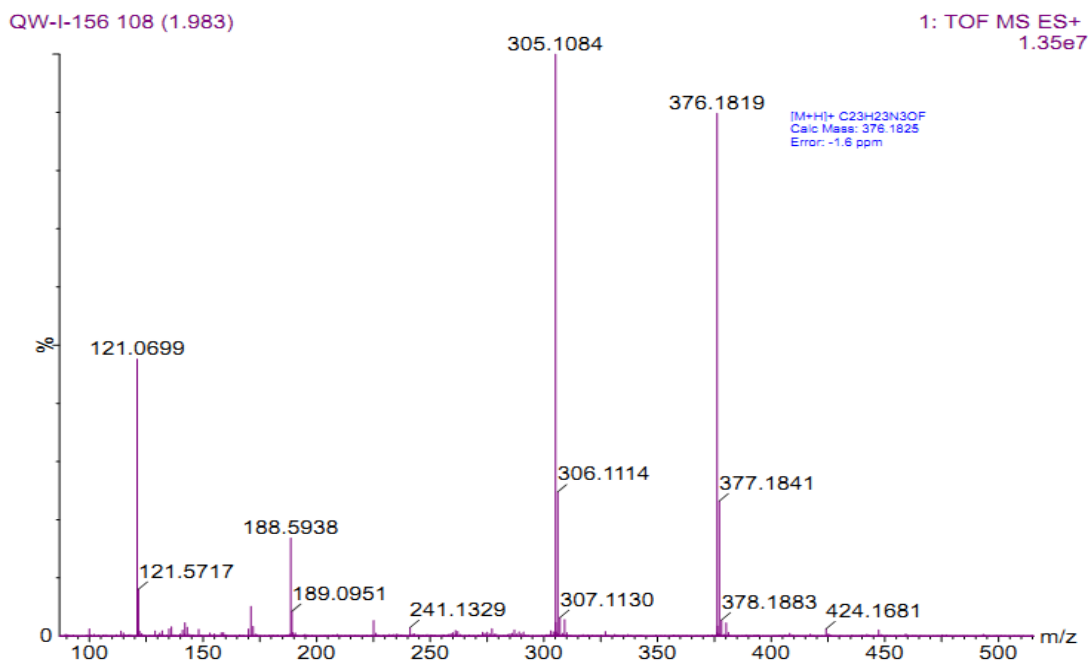

HR-MS of **10f**

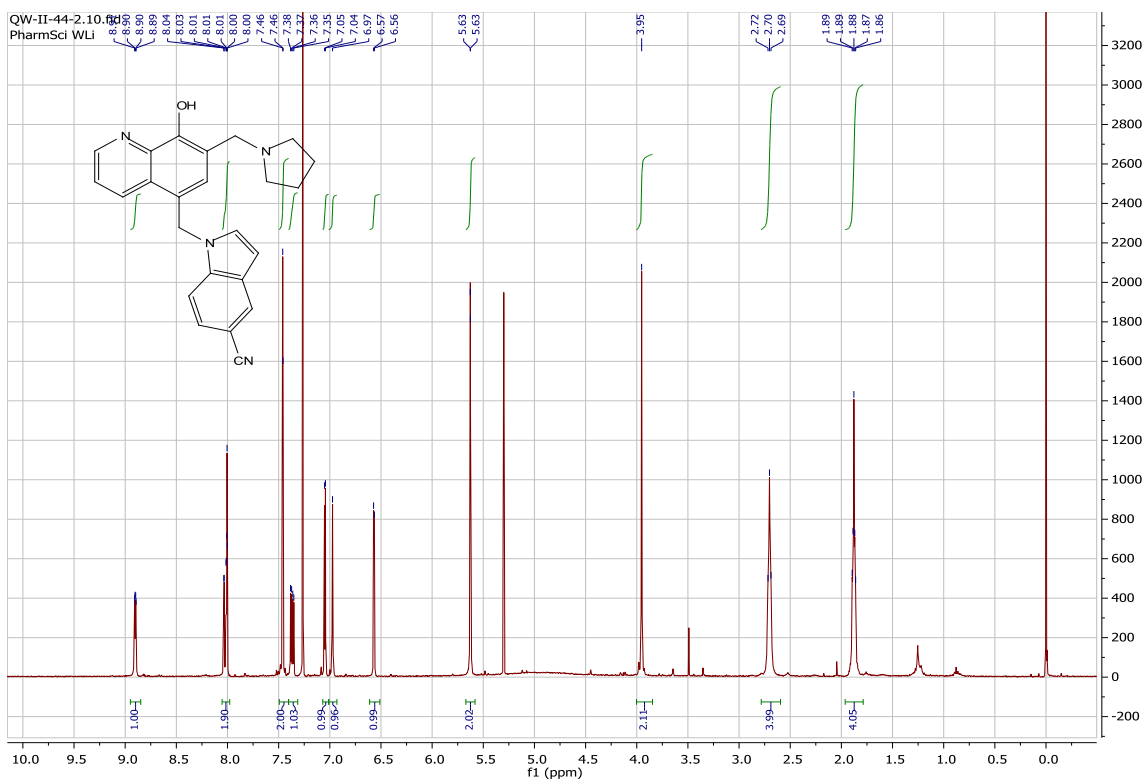

<sup>1</sup>H-NMR of **10g**



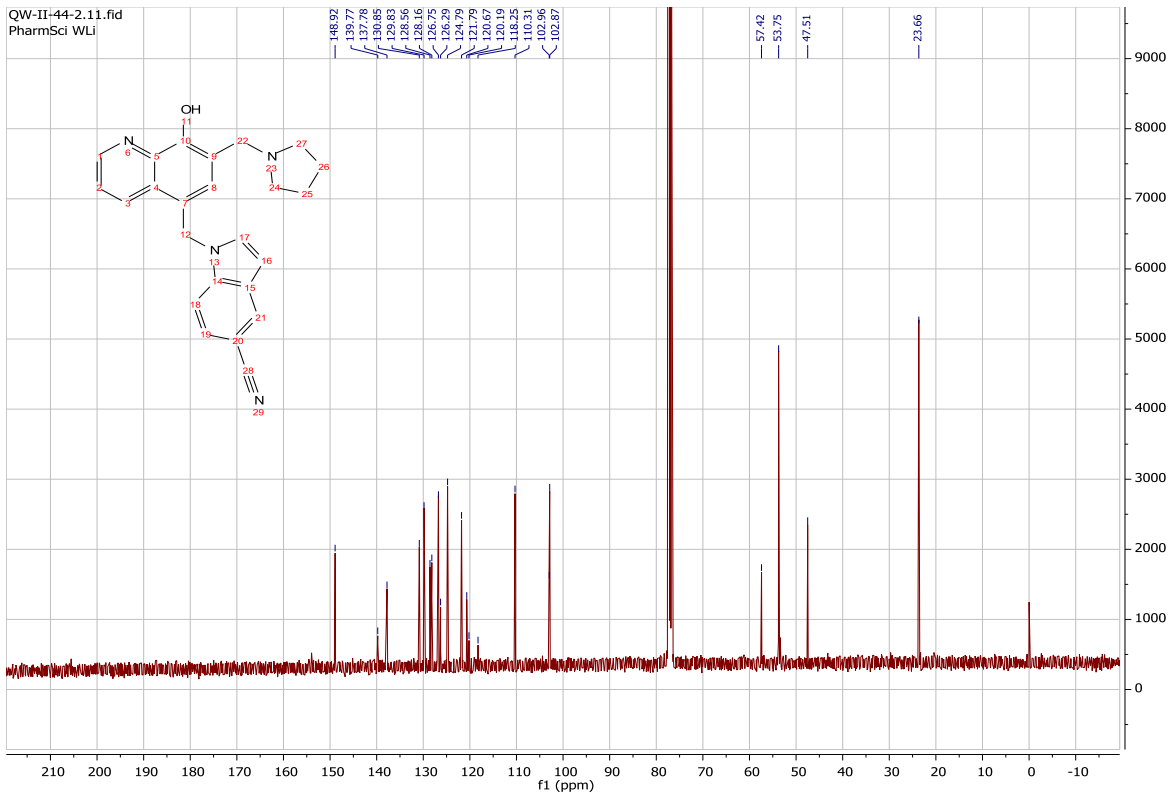

<sup>13</sup>C-NMR of 10g

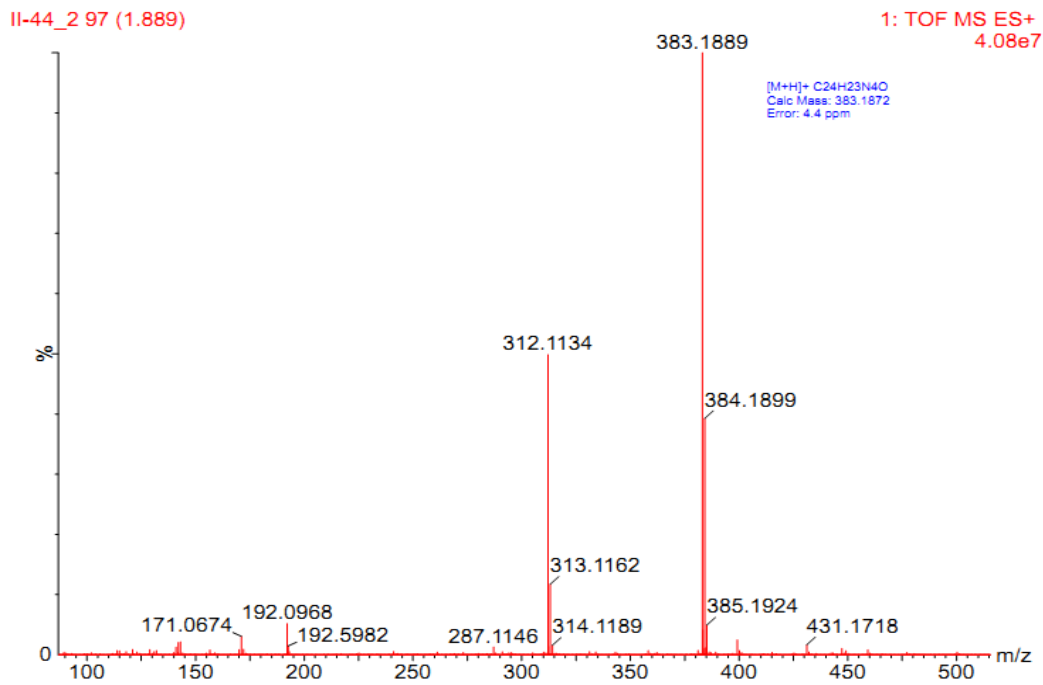

HR-MS of 10g

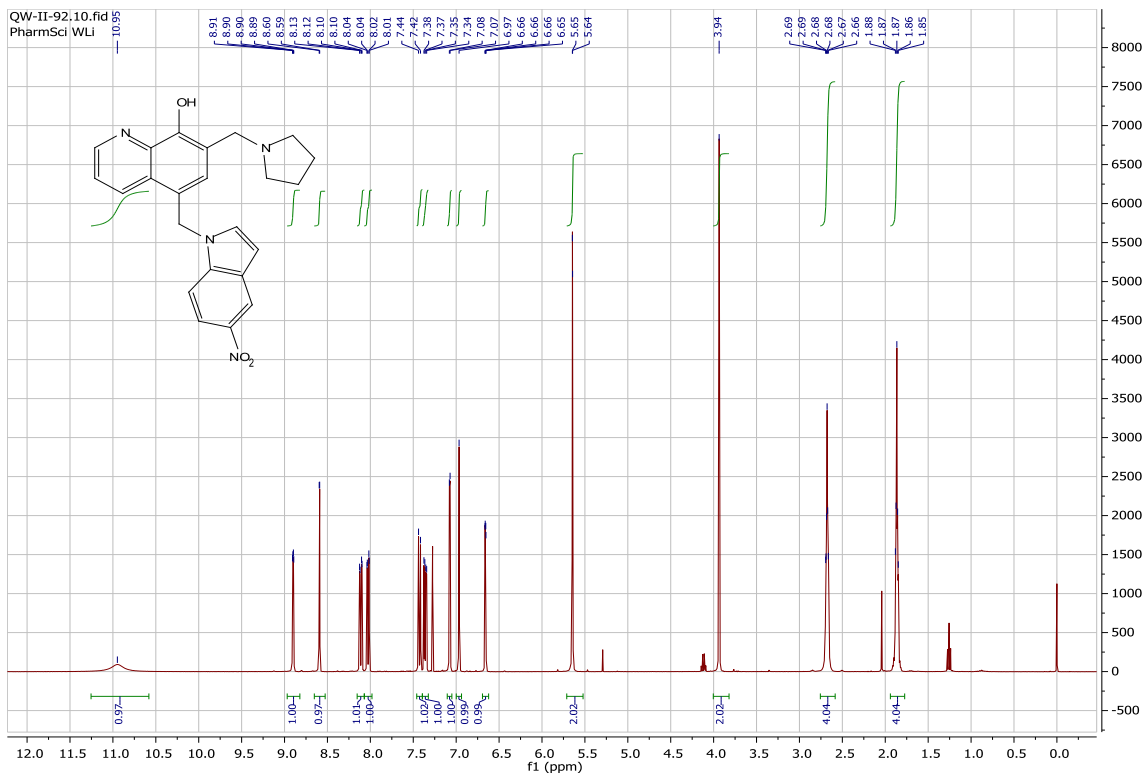

<sup>1</sup>H-NMR of 10h

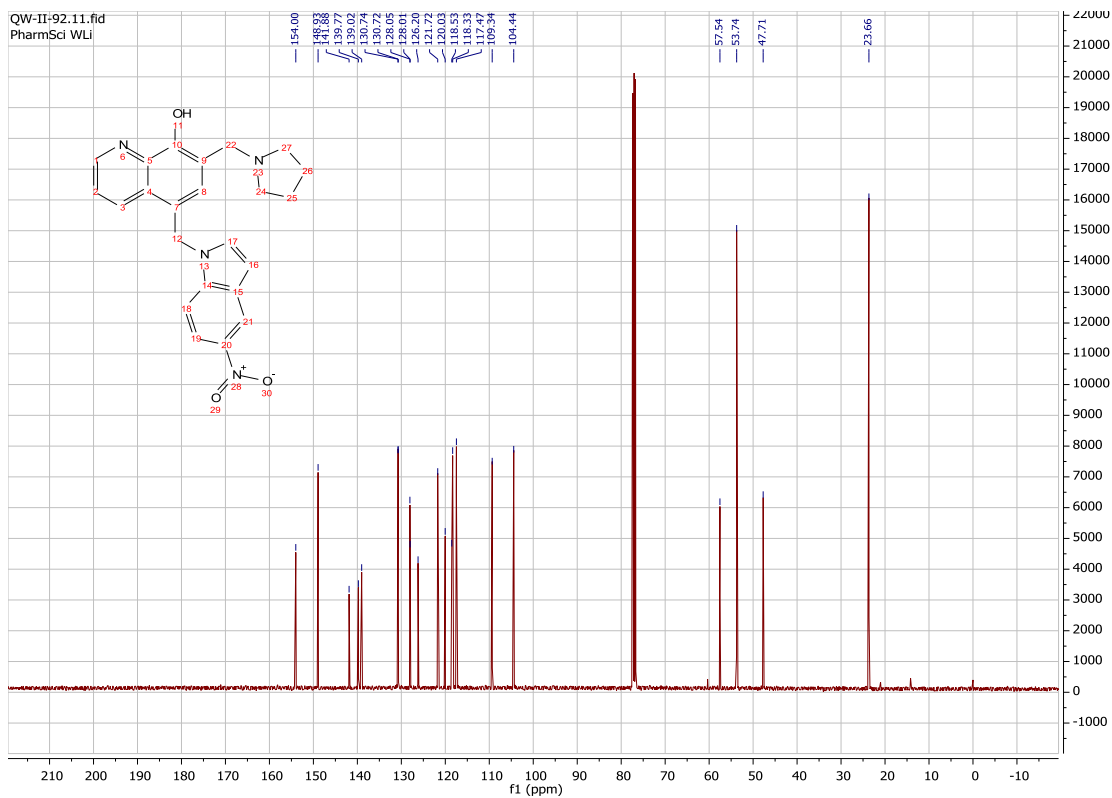

<sup>13</sup>C-NMR of 10h

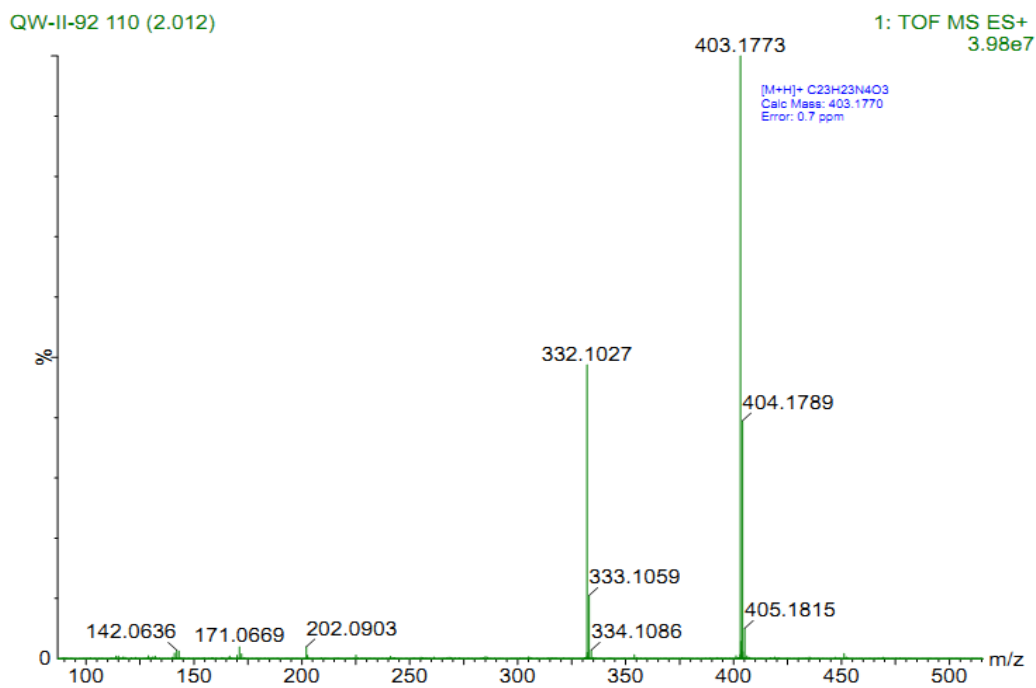

HR-MS of 10h

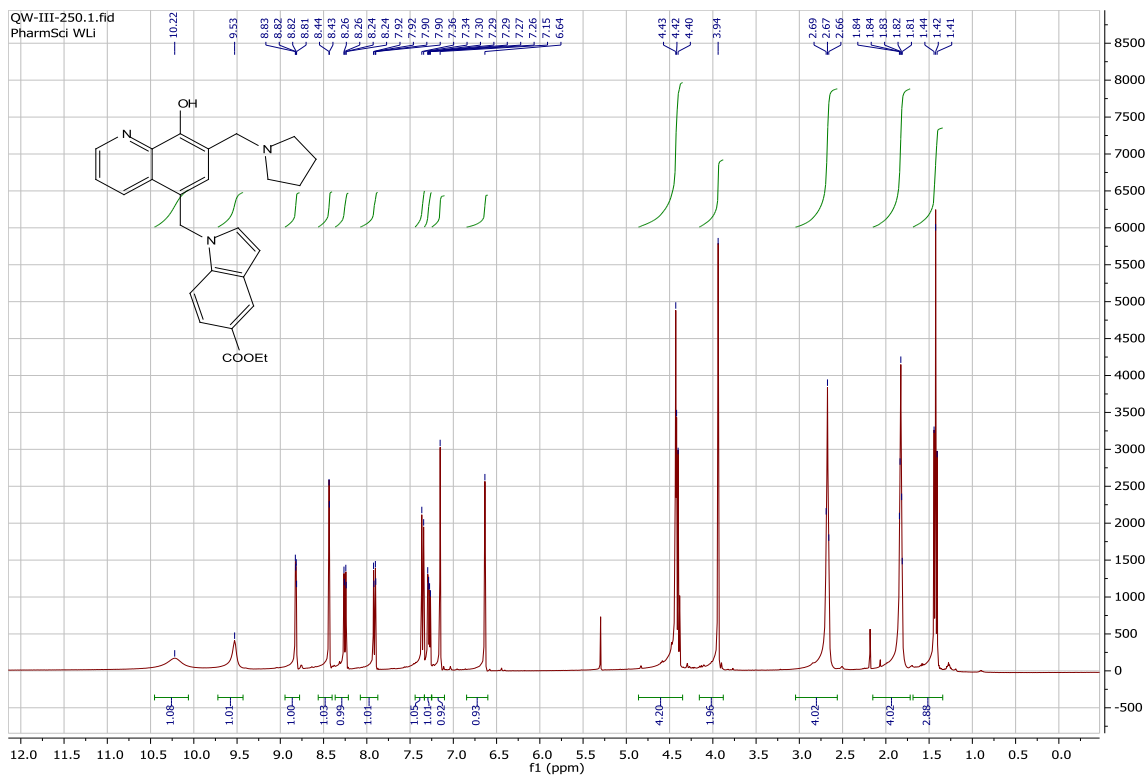

<sup>1</sup>H-NMR of 10i

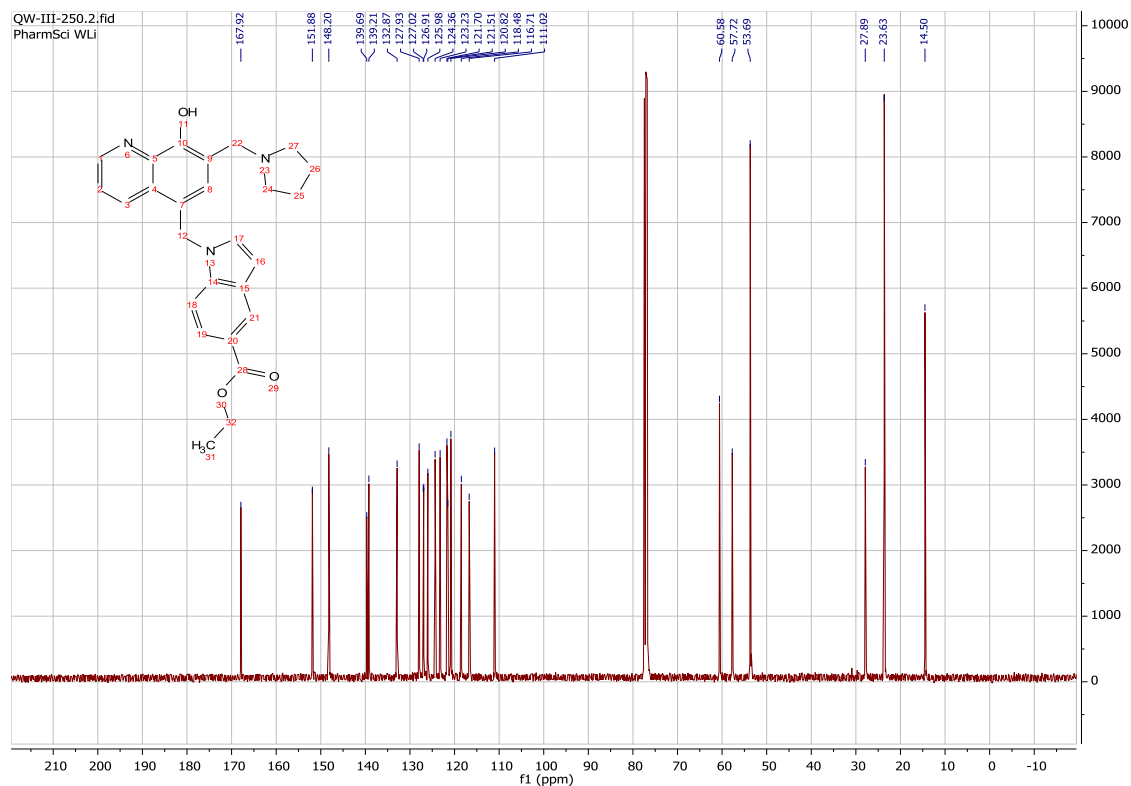

$^{13}\text{C}$ -NMR of 10i

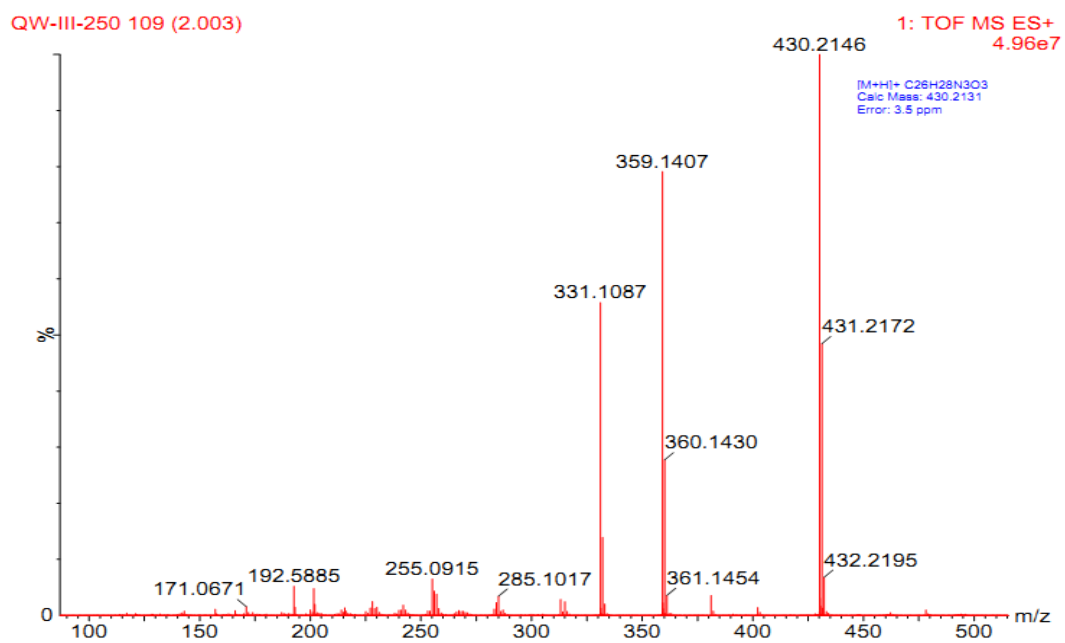

HR-MS of 10i

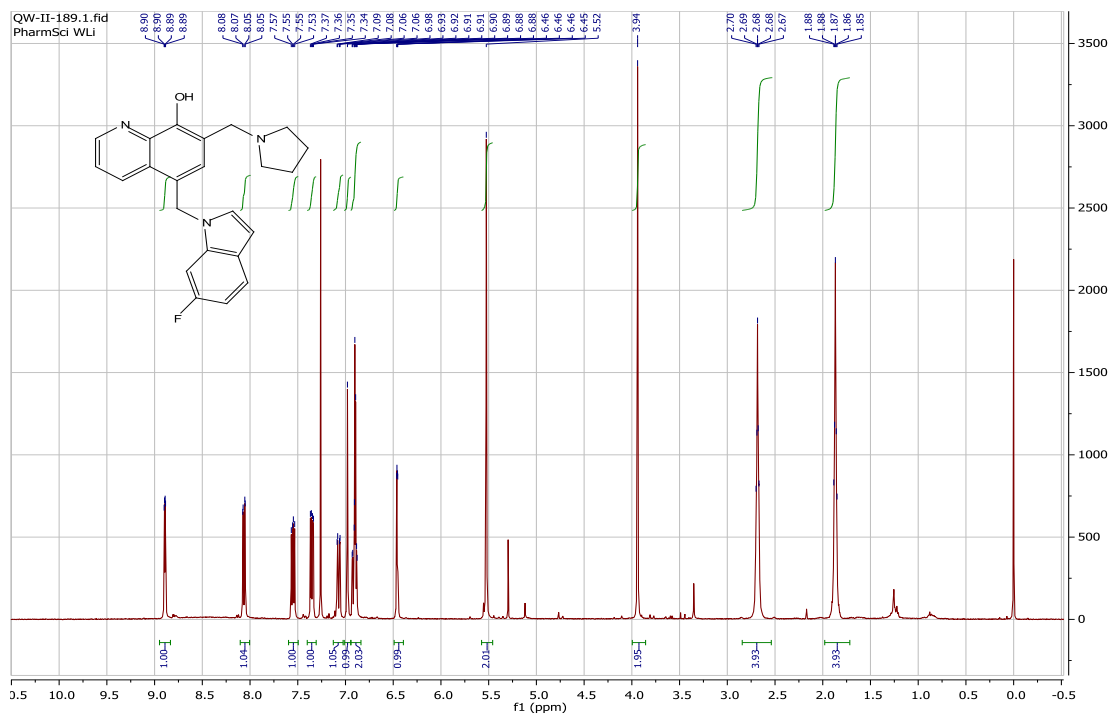

<sup>1</sup>H-NMR of 10j

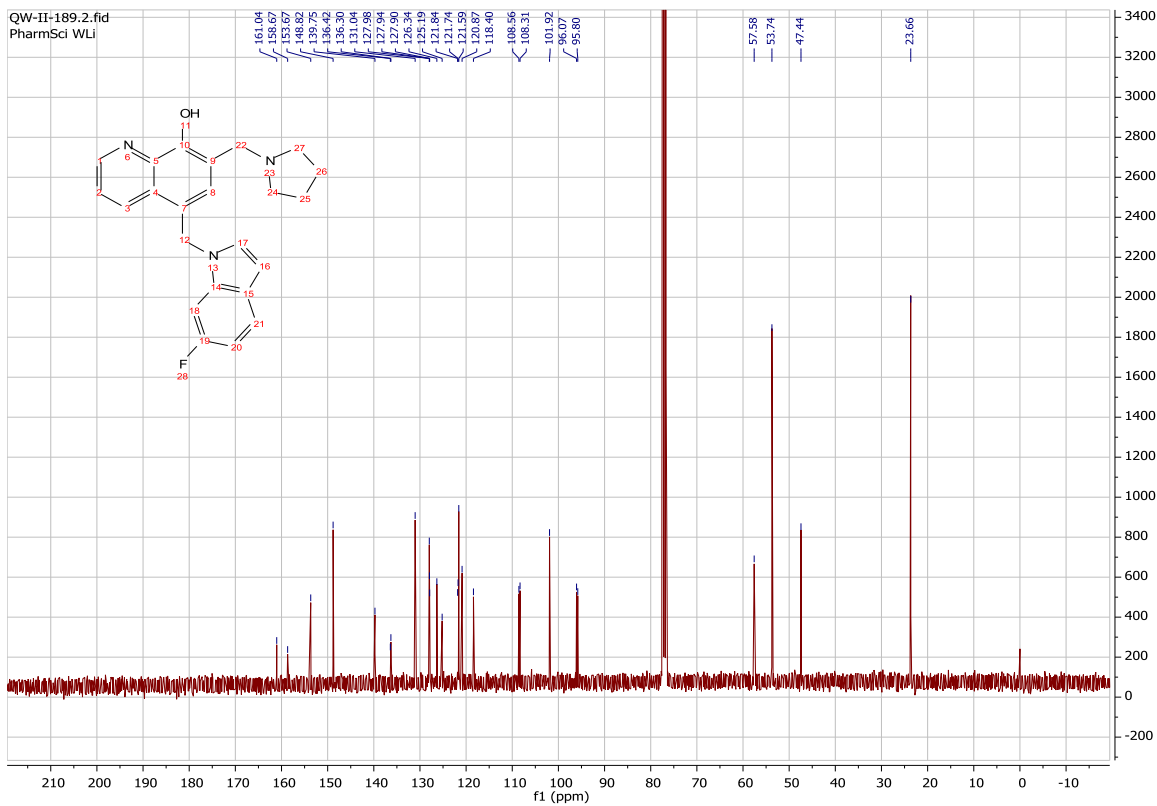

<sup>13</sup>C-NMR of 10j

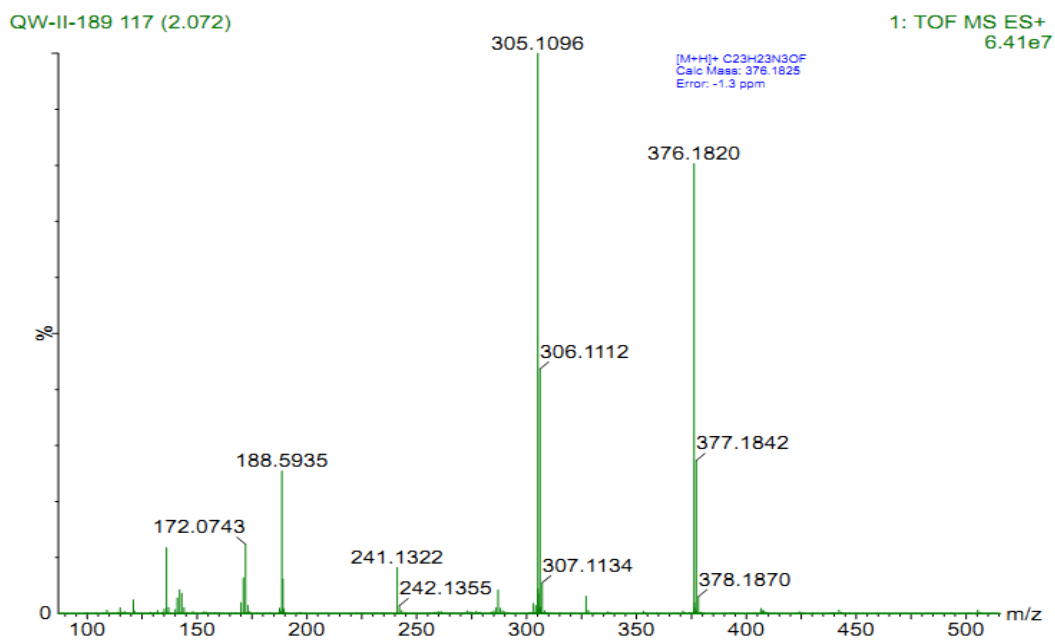

HR-MS of 10j

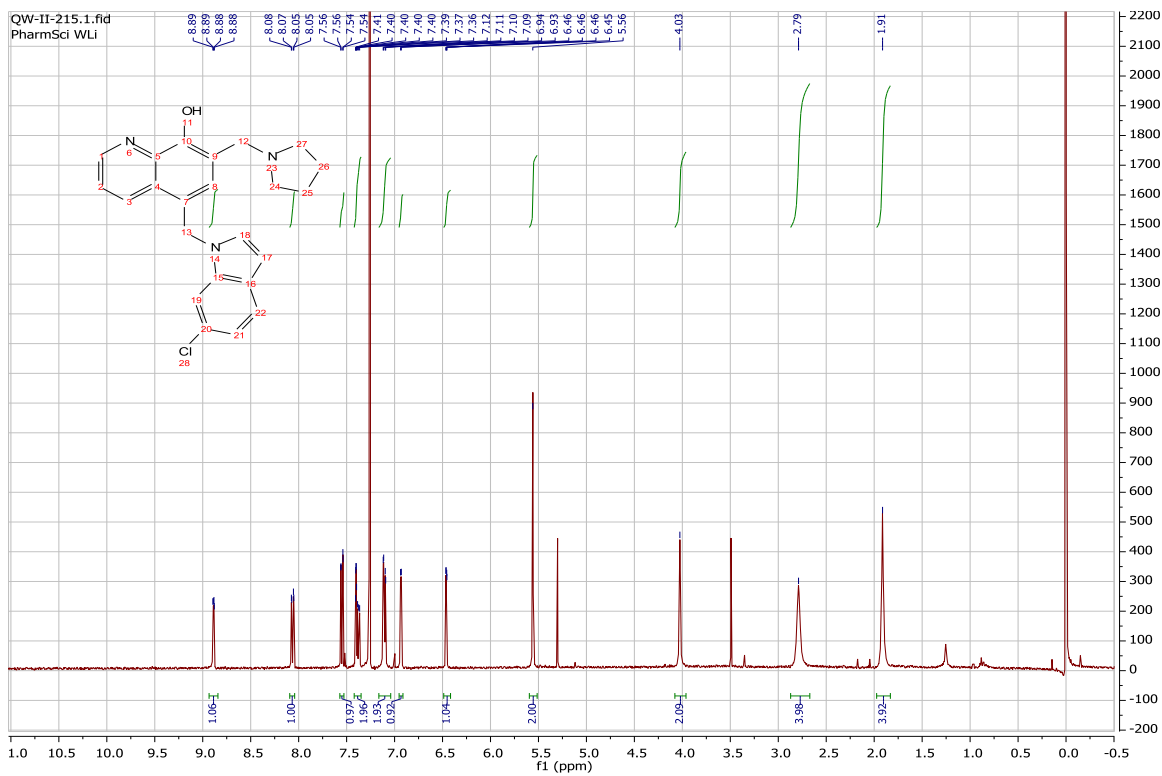

<sup>1</sup>H-NMR of 10k

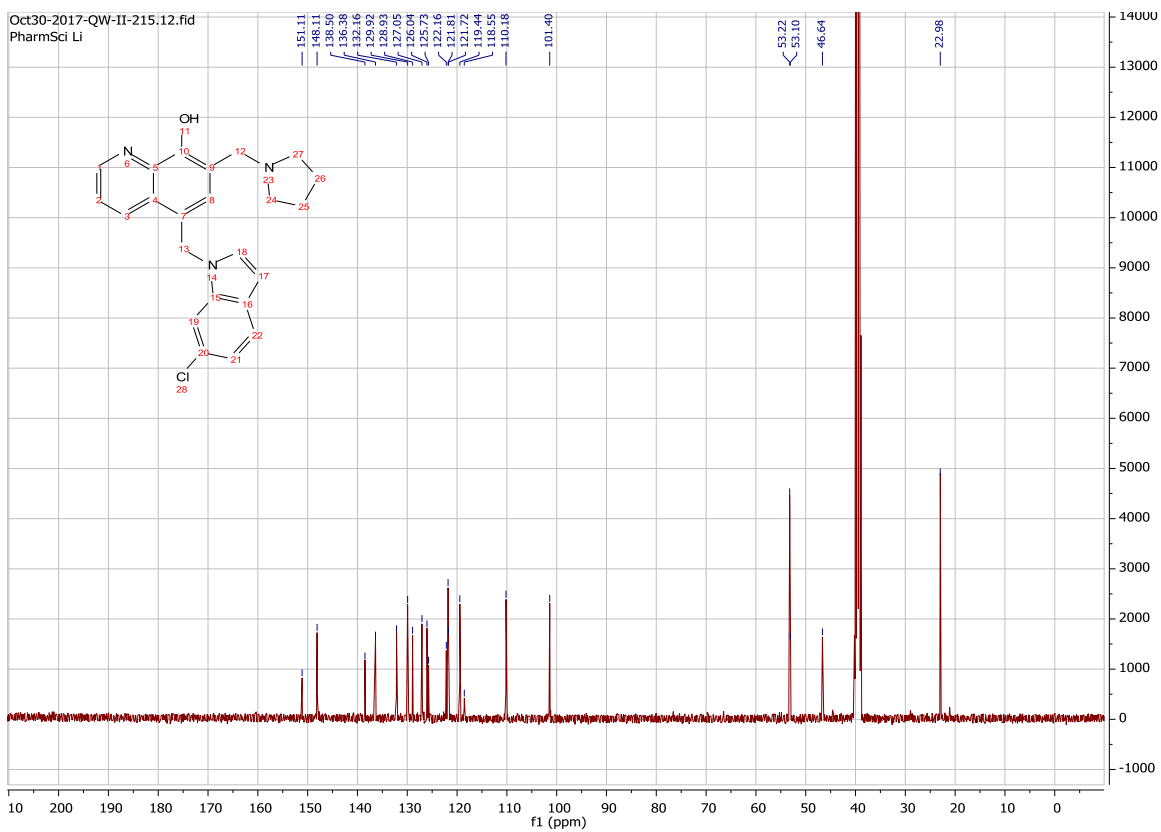

$^{13}\text{C}$ -NMR of 10k

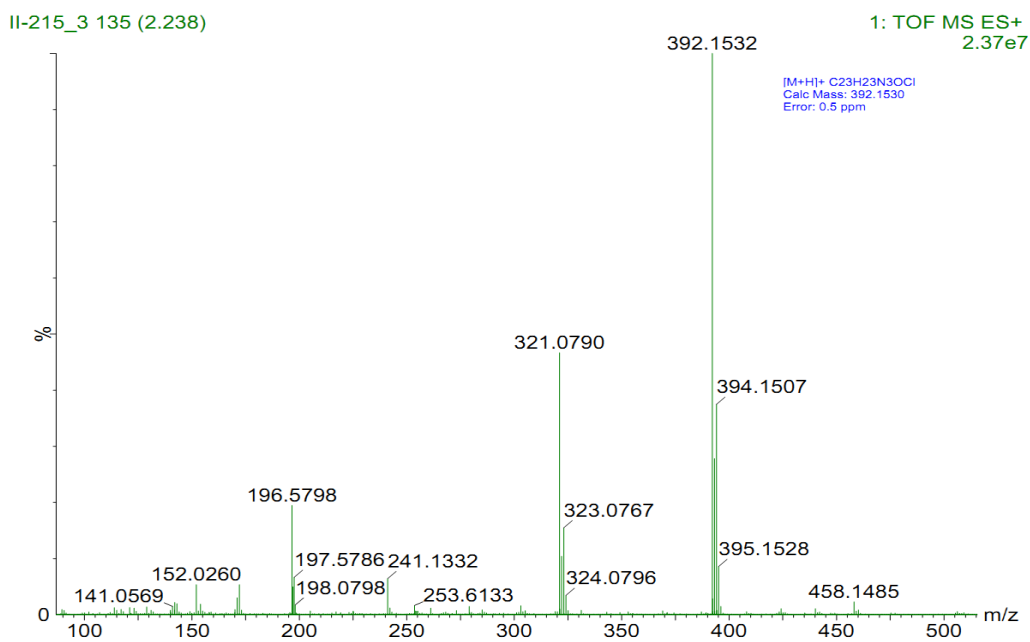

### HR-MS of 10k

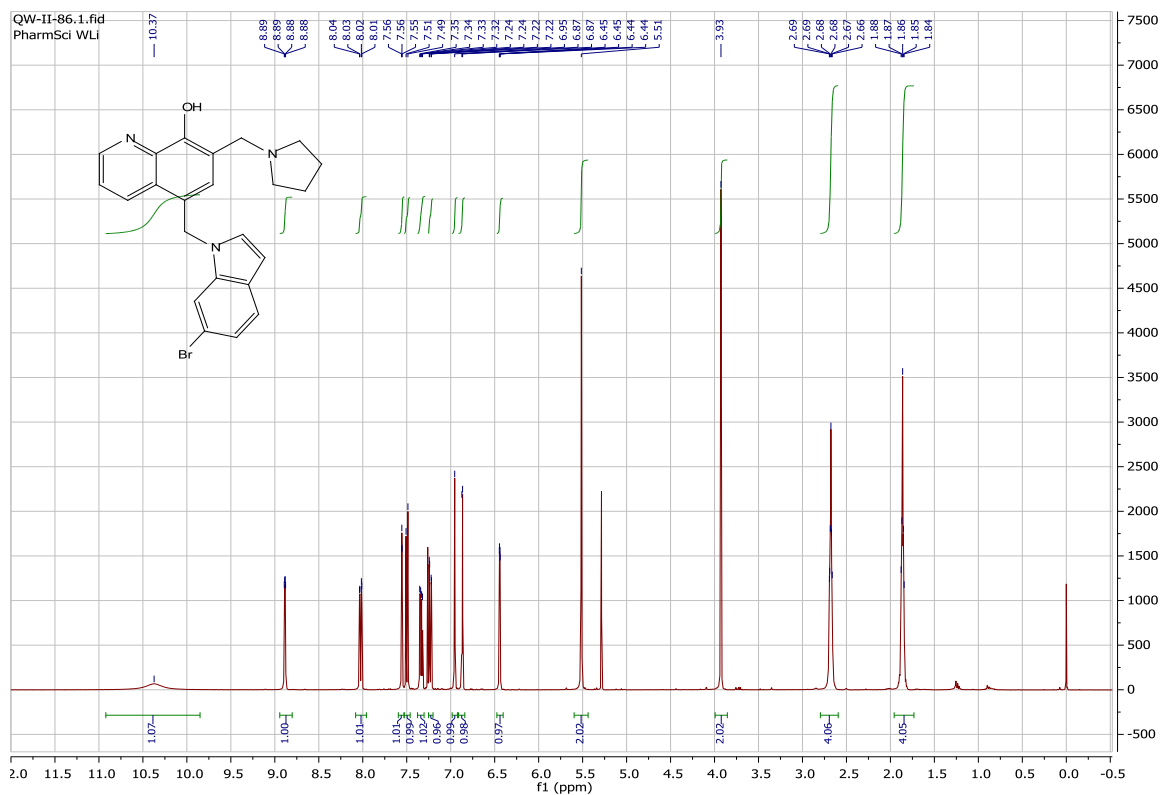

### <sup>13</sup>C-NMR of 10l

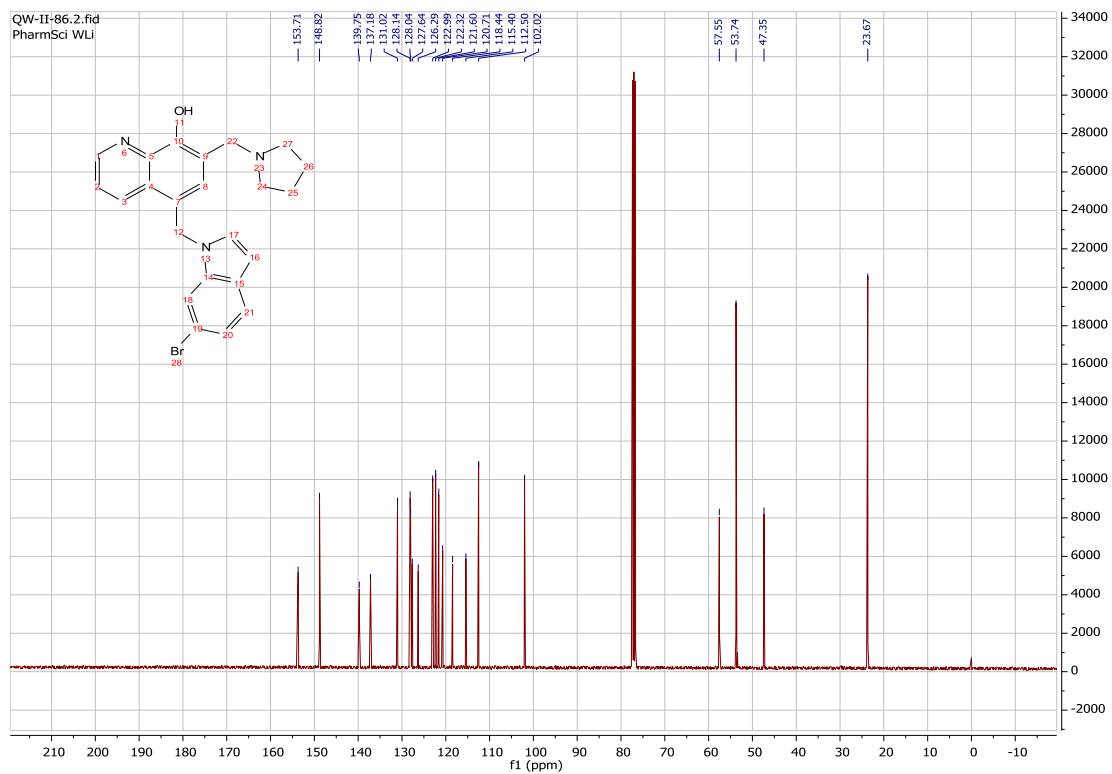



### <sup>13</sup>C-NMR of 10l

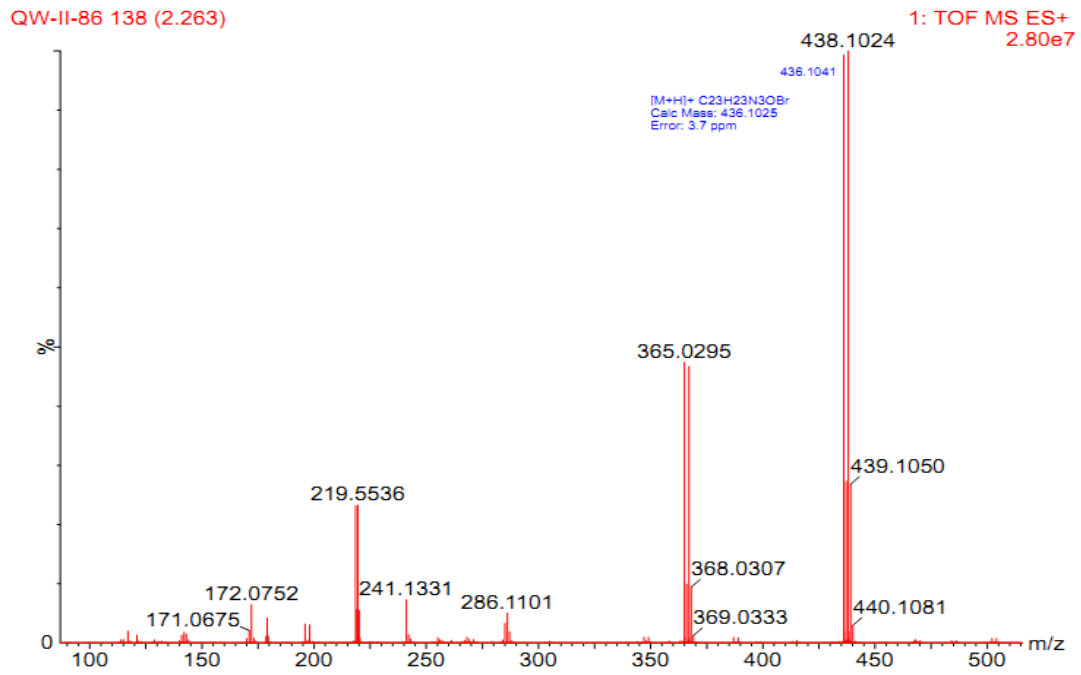

### HR-MS of 10l

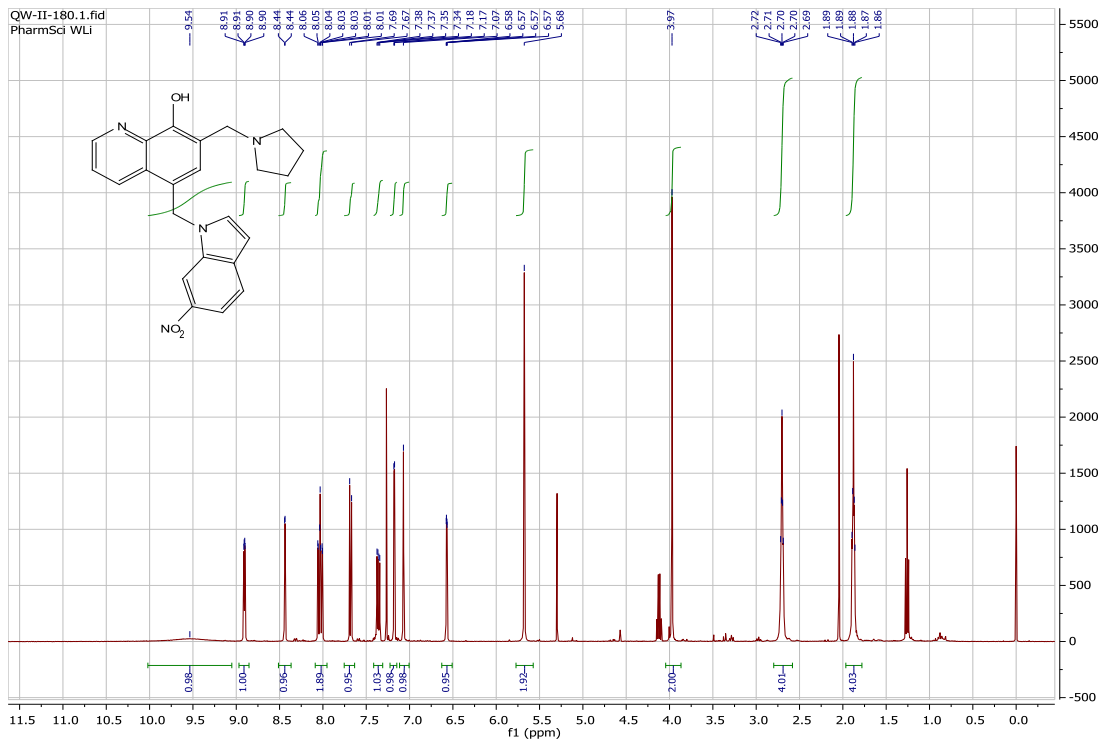

### <sup>1</sup>H-NMR of 10m

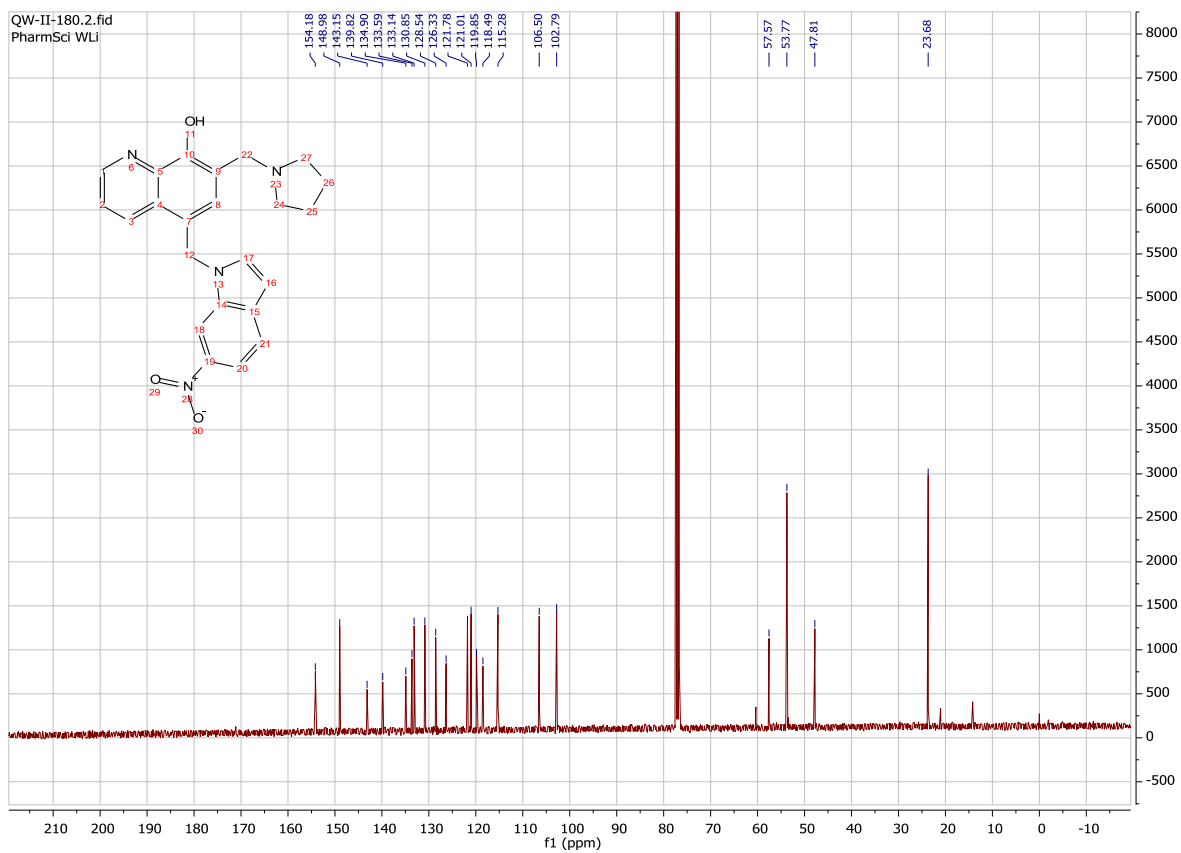

$^{13}\text{C-NMR}$  of 10m

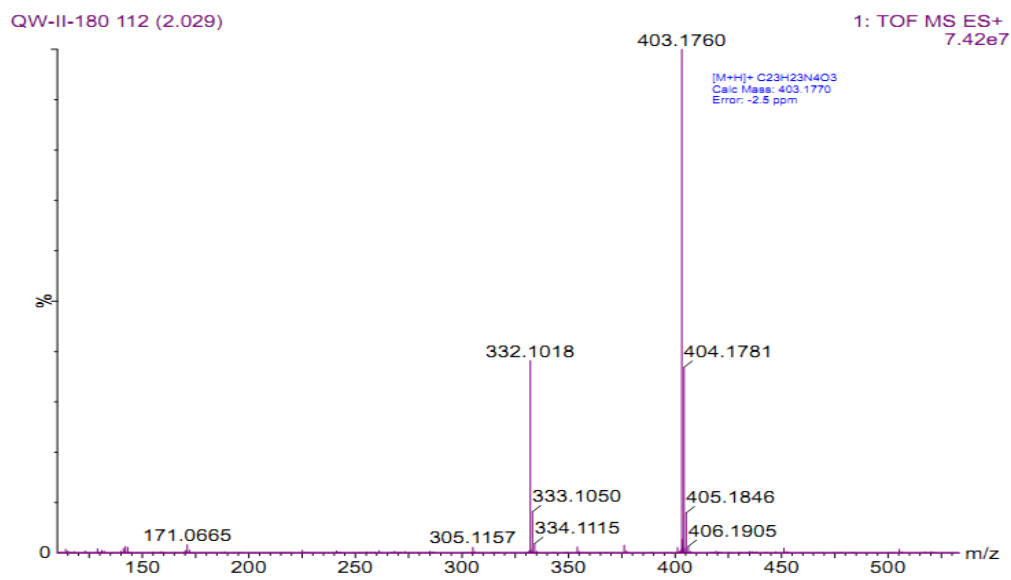

HR-MS of 10m

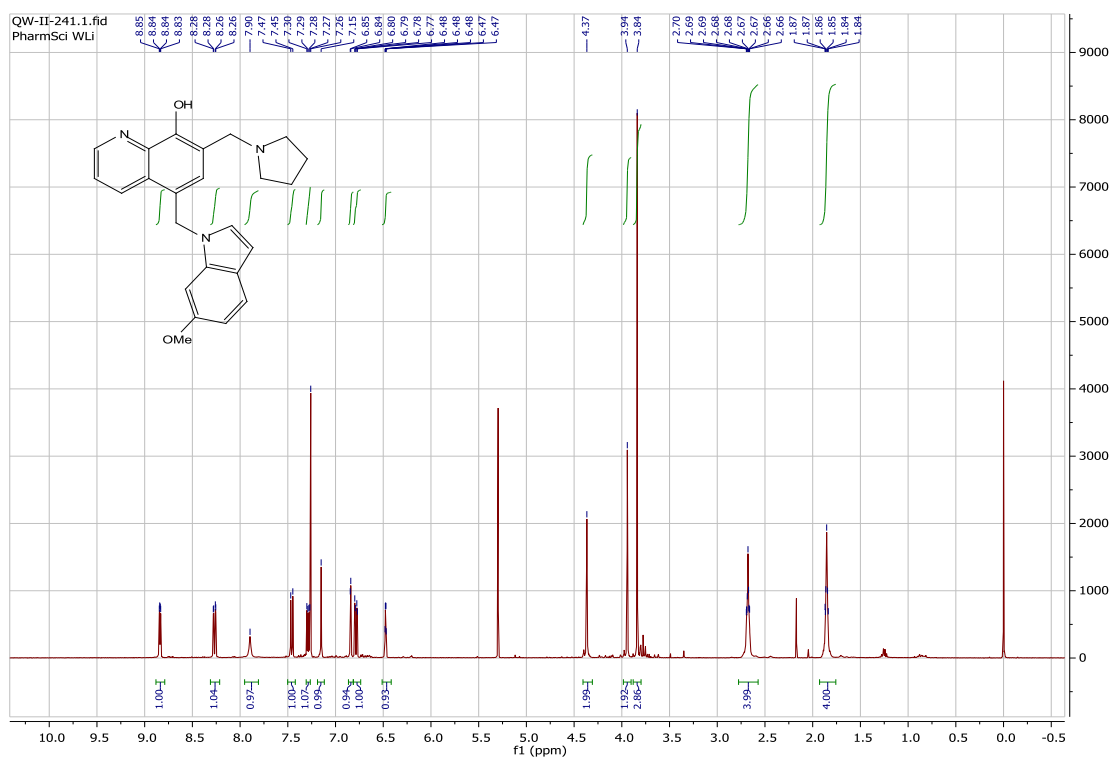

<sup>1</sup>H-NMR of 10n

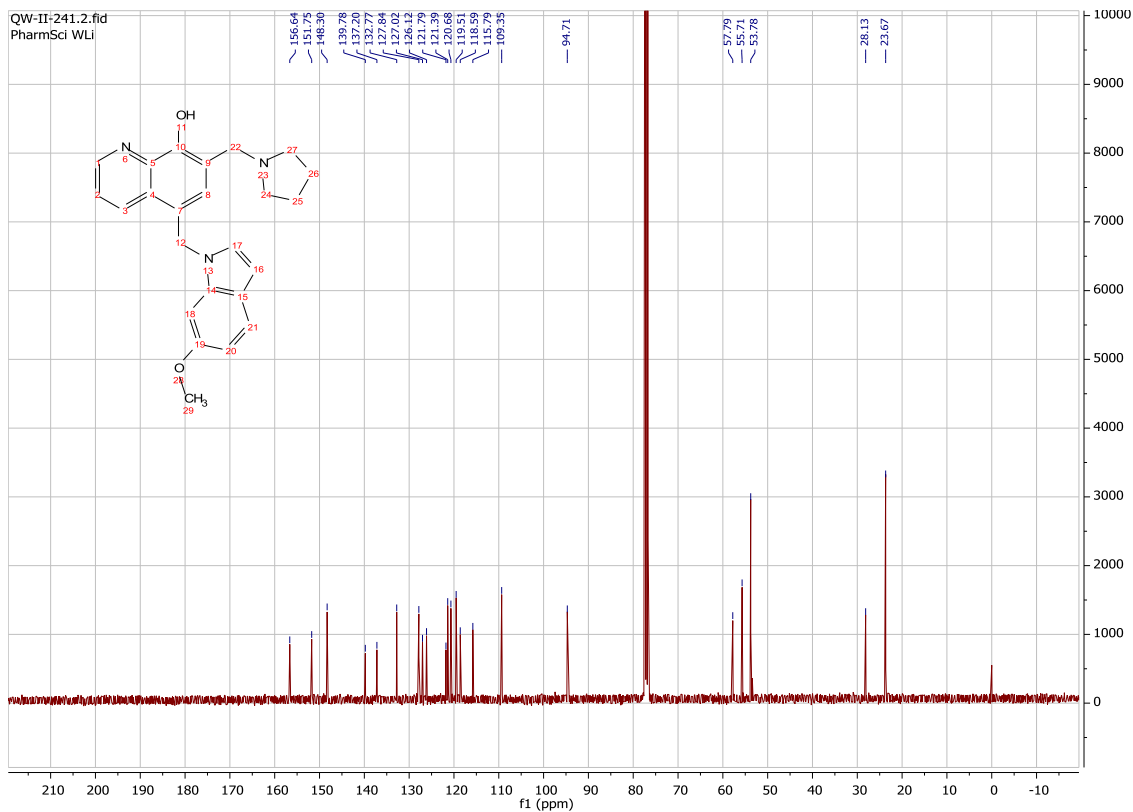

### <sup>13</sup>C-NMR of 10n

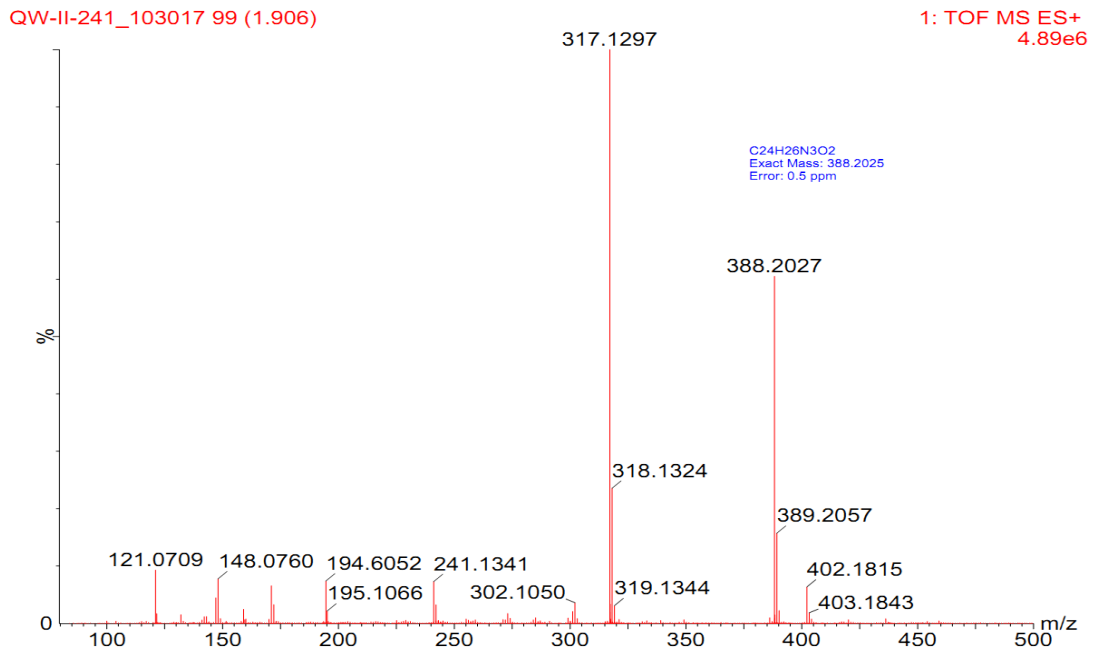

### HR-MS of 10n

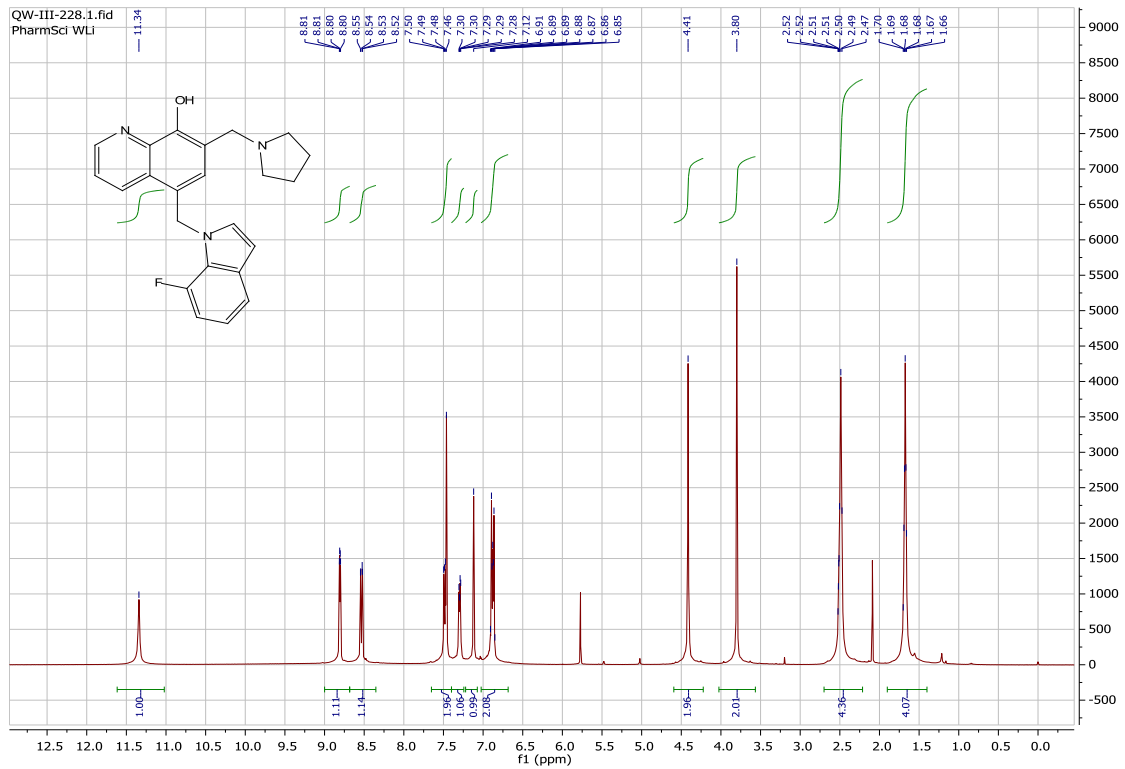

### <sup>1</sup>H-NMR of 10o

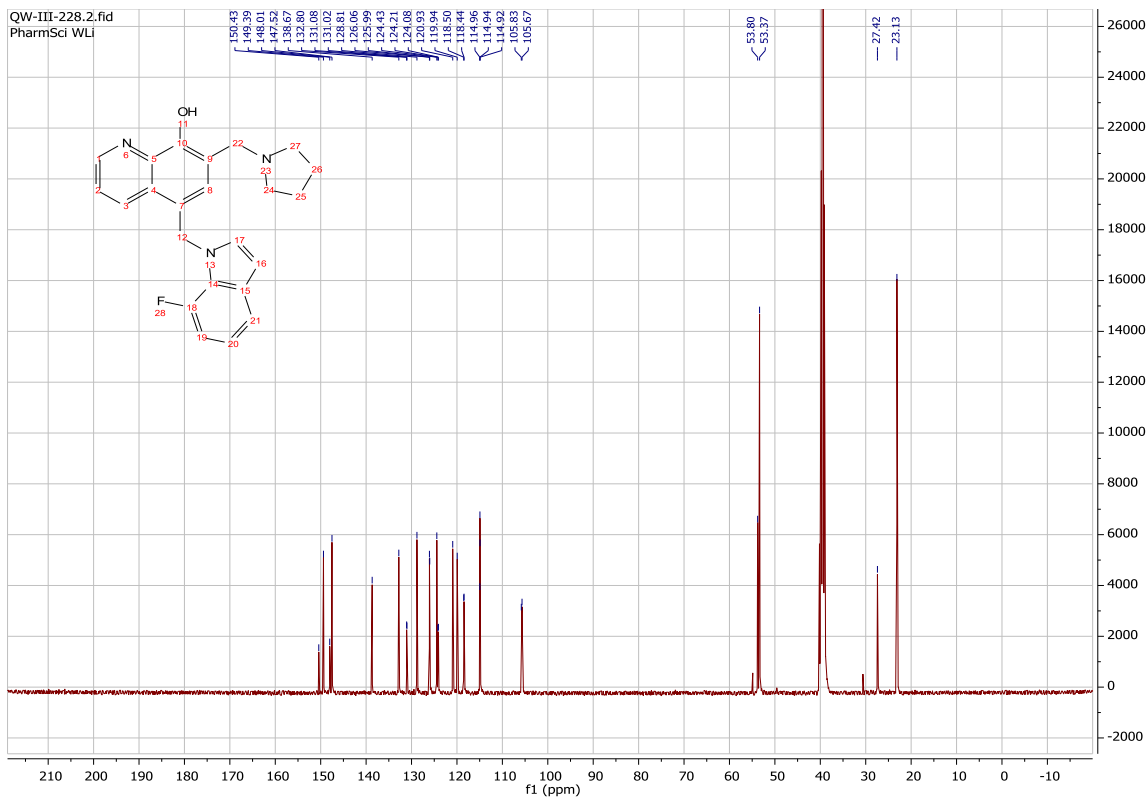

$^{13}\text{C-NMR}$  of **10o**

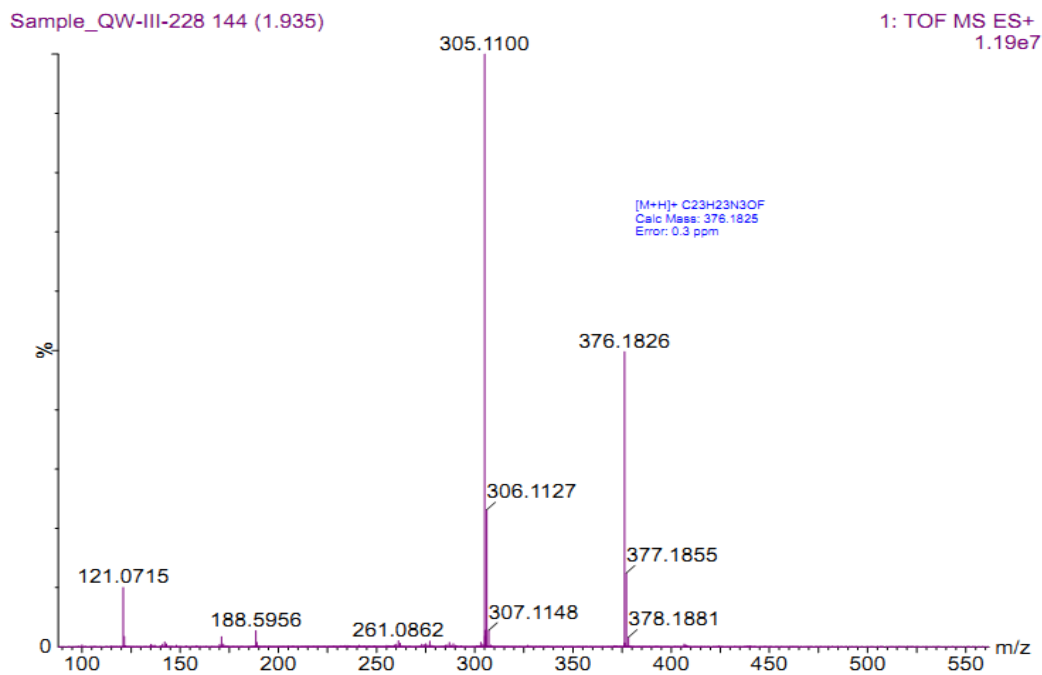

HR-MS of **10o**

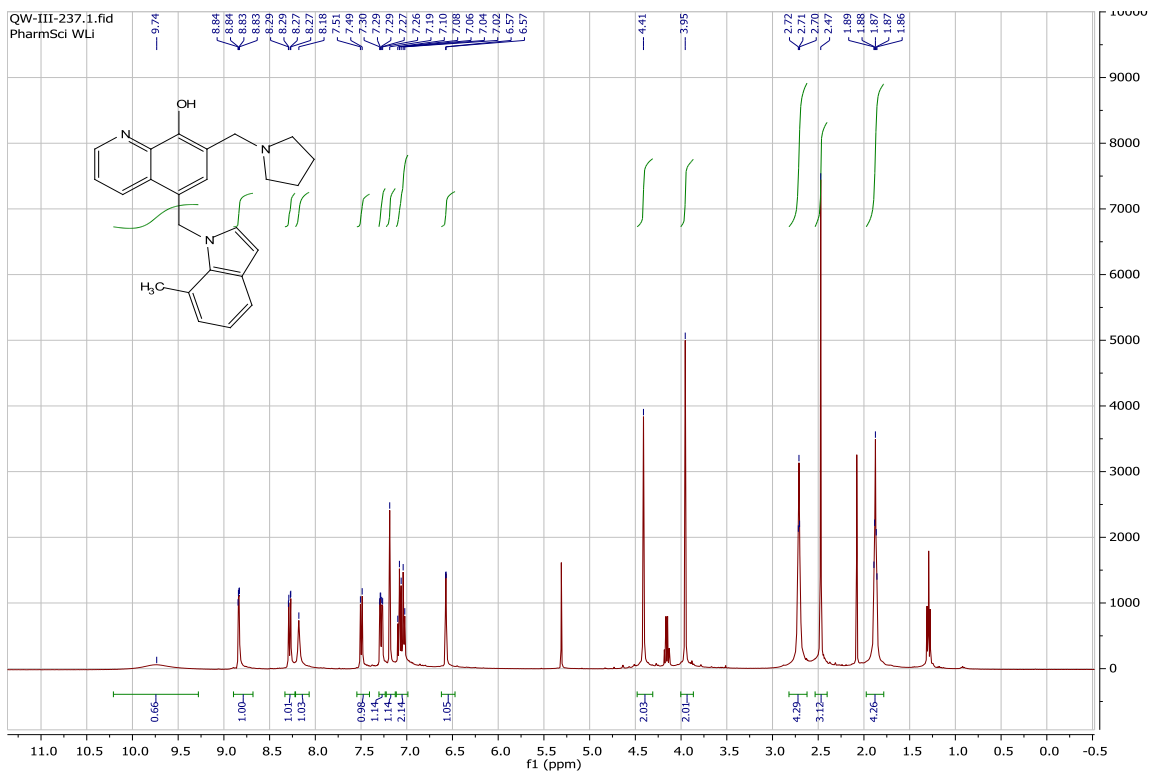

<sup>1</sup>H-NMR of 10p

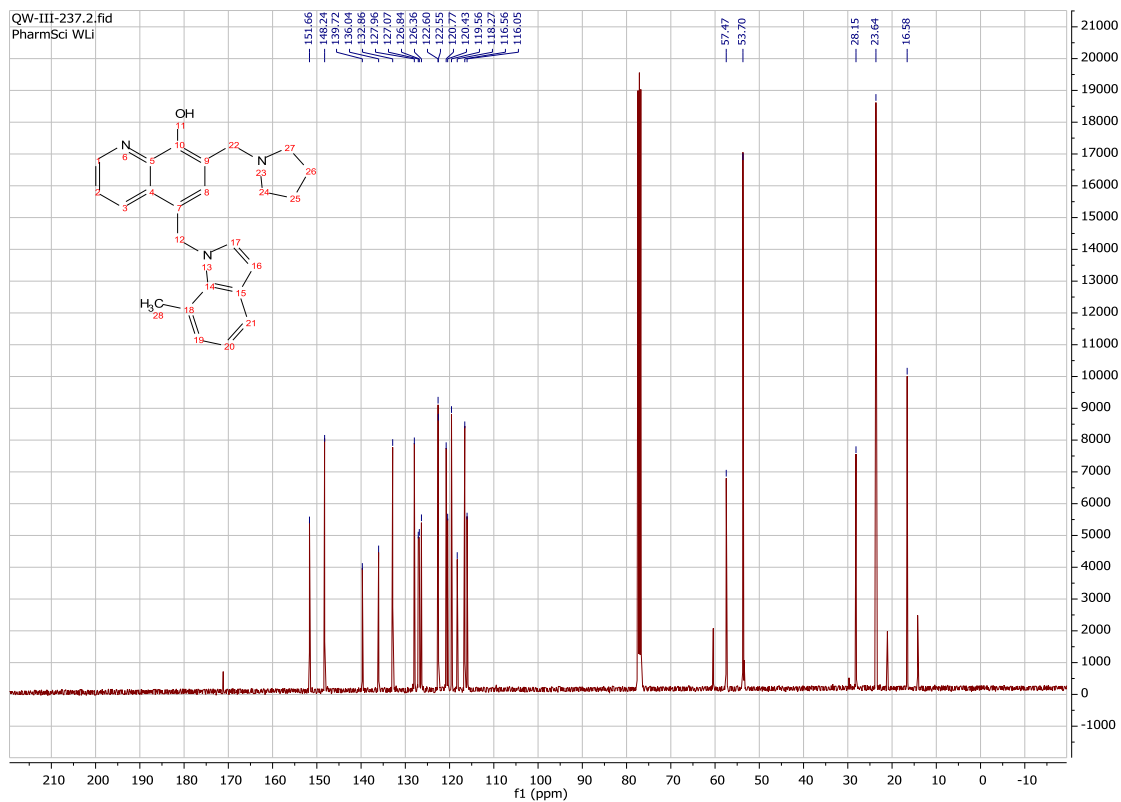

<sup>13</sup>C-NMR of 10p

QW-III-237 115 (2.055)

1: TOF MS ES+  
6.36e7

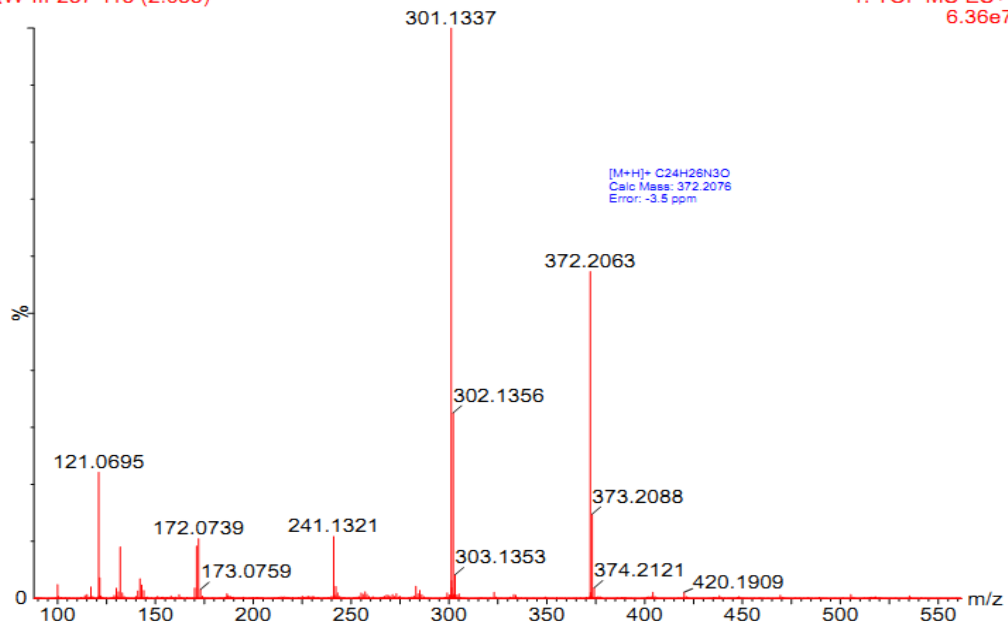

### HR-MS of 10p

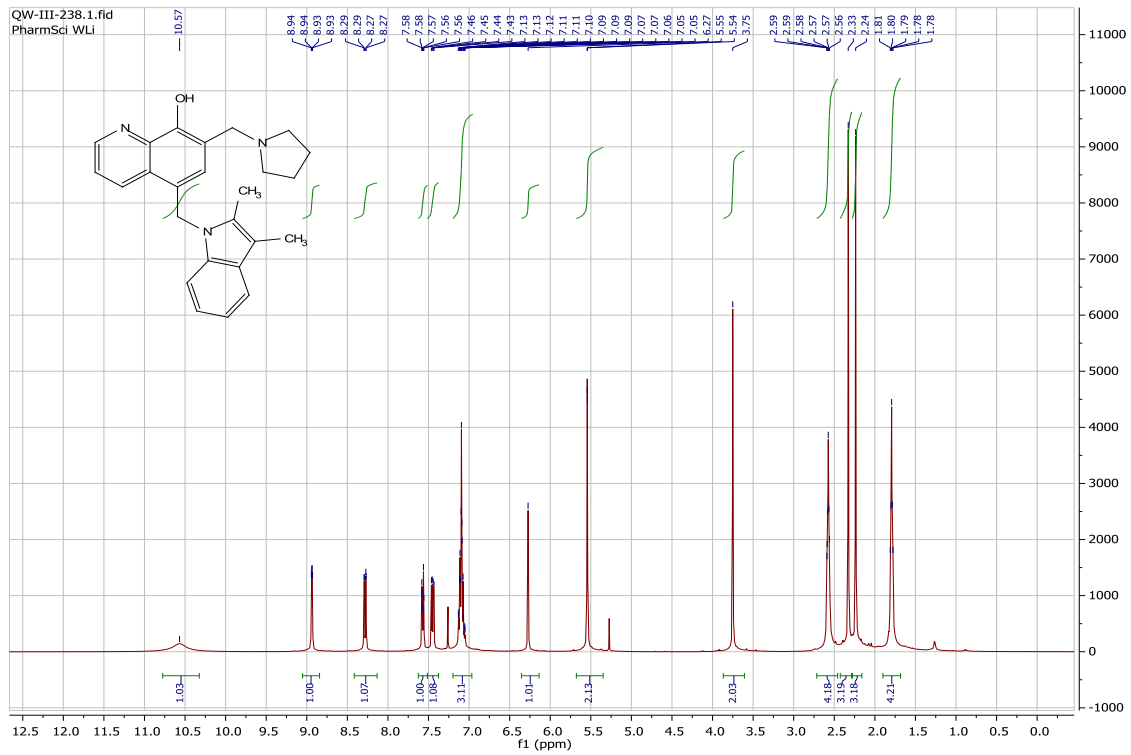

### <sup>1</sup>H-NMR of 10q

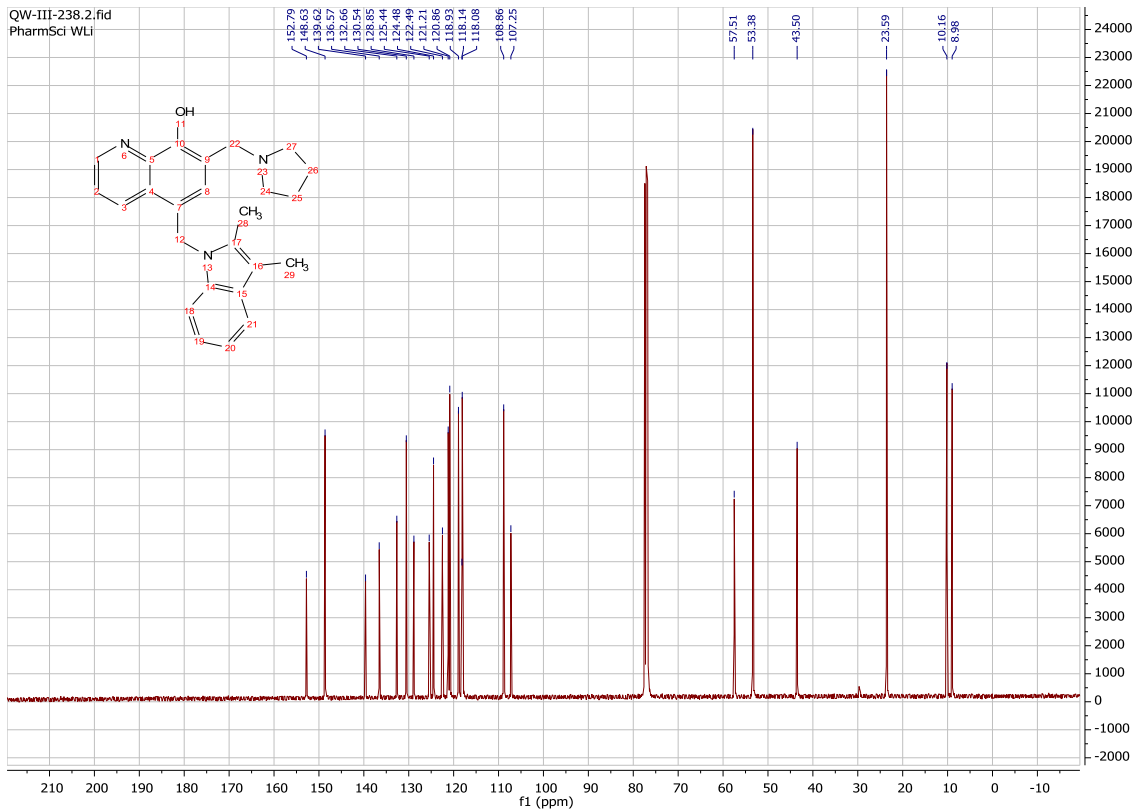

$^{13}\text{C-NMR}$  of **10q**

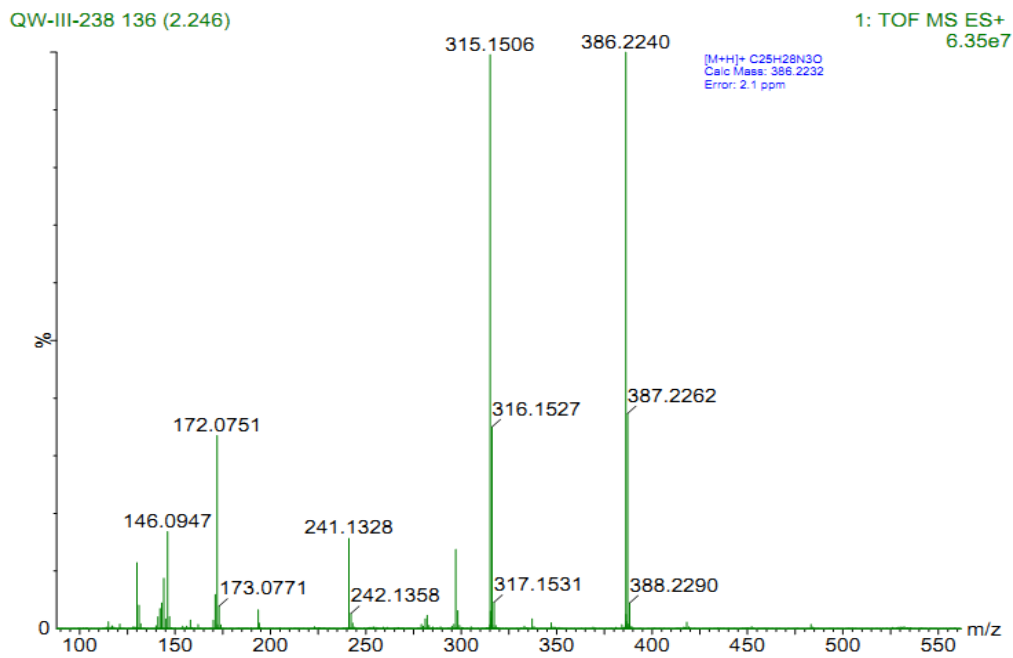

HR-MS of **10q**



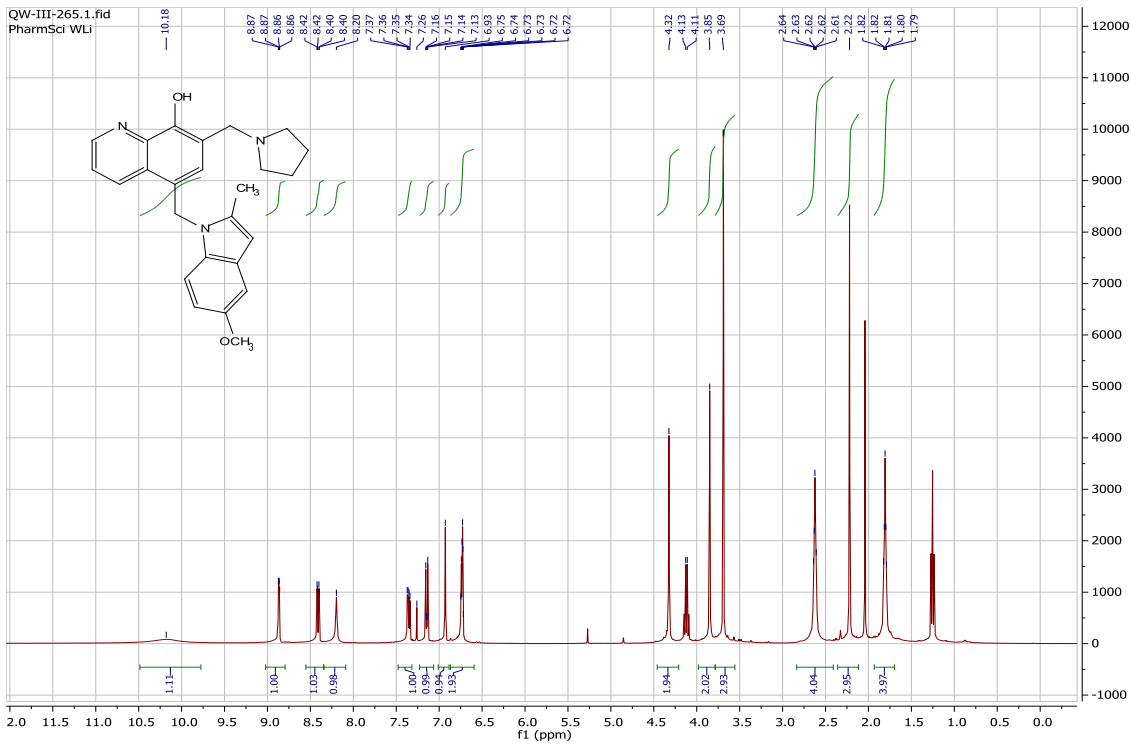

<sup>1</sup>H-NMR of 10r

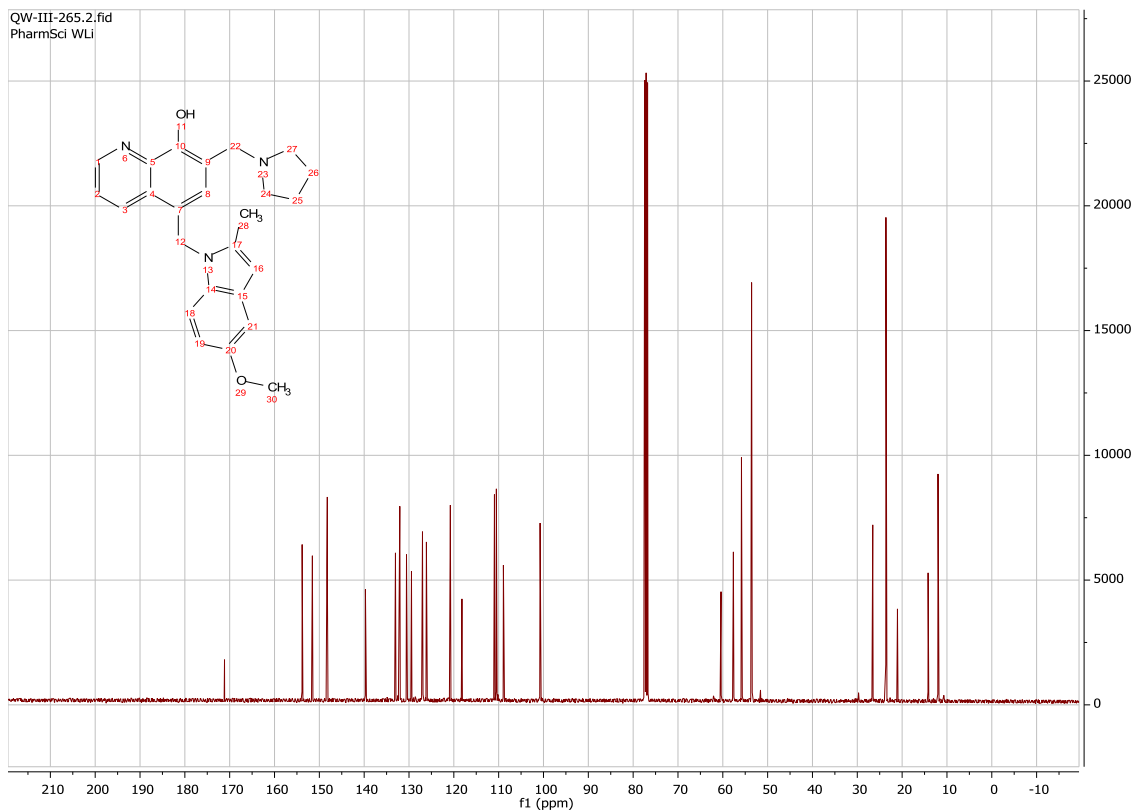

<sup>13</sup>C-NMR of 10r

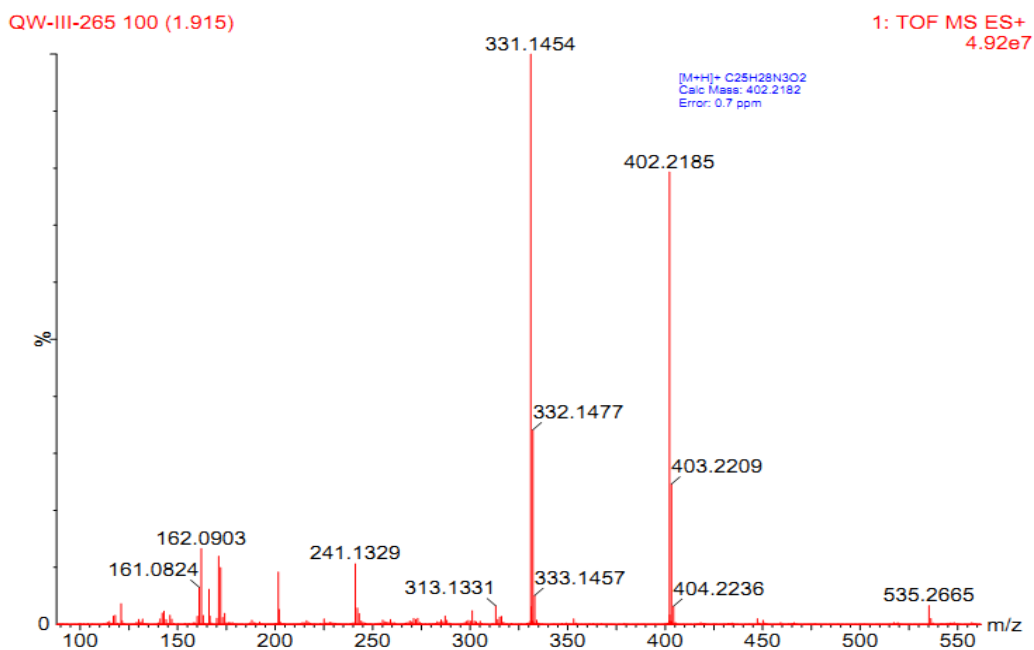

### HR-MS of 10r

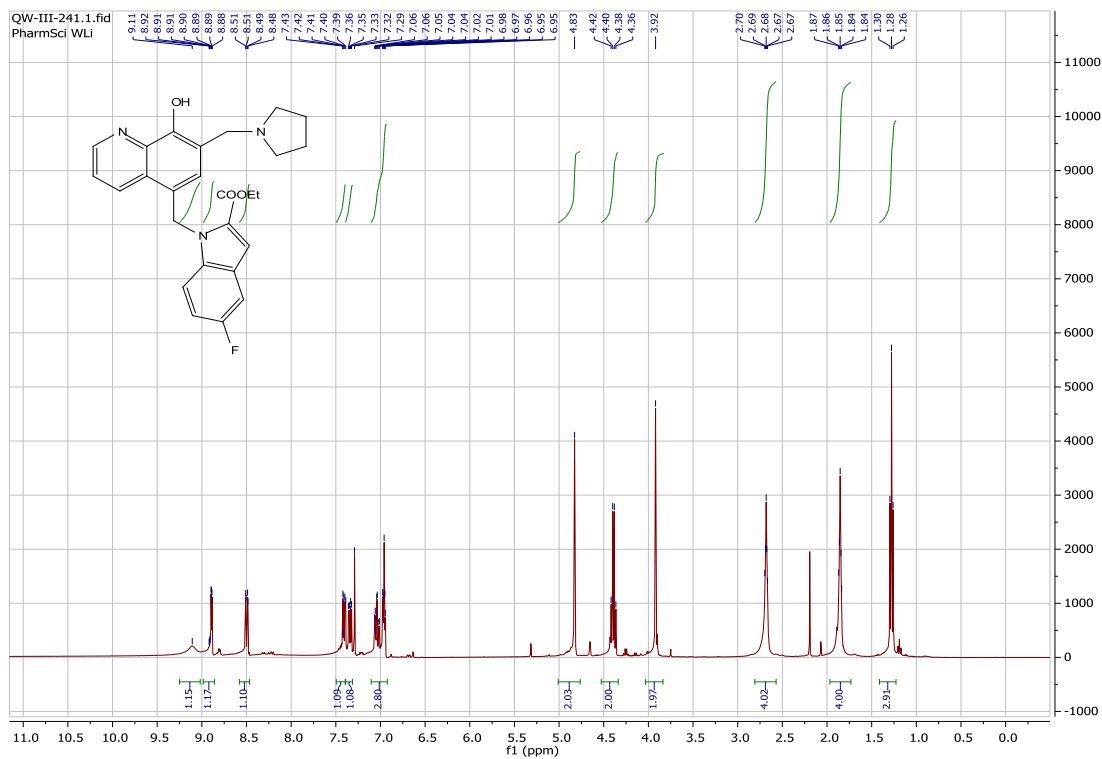

### <sup>1</sup>H-NMR of 10s

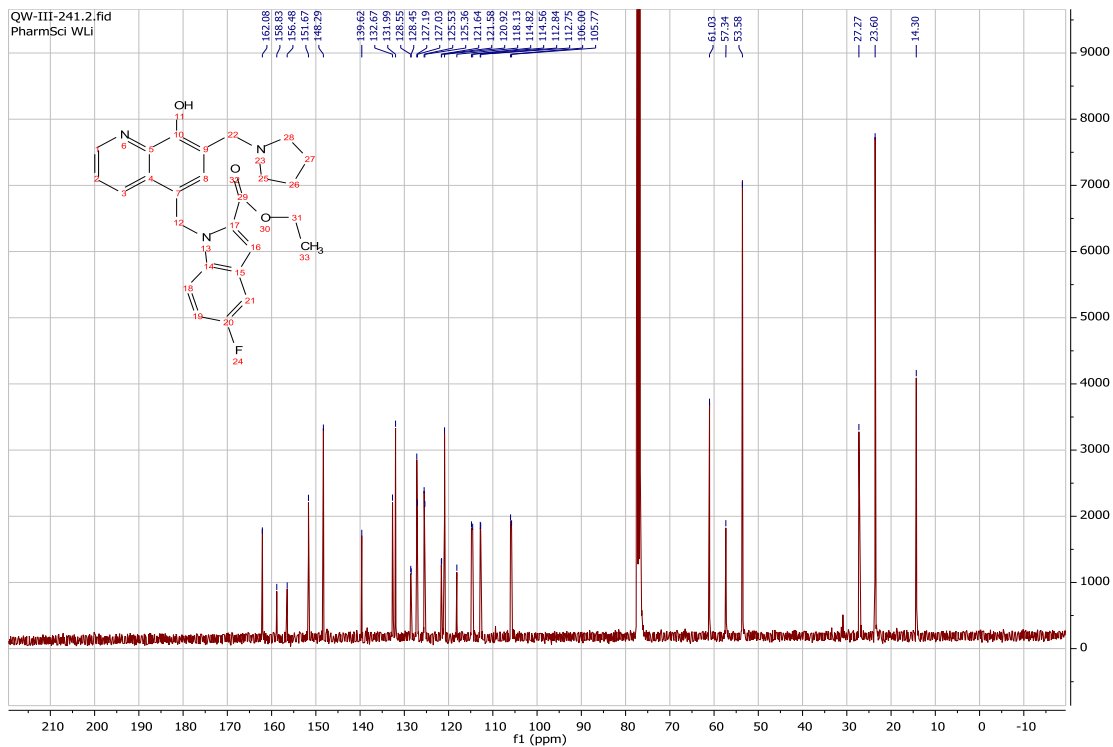

$^{13}\text{C-NMR}$  of 10s

Sample\_QW-III-241 163 (2.121)

1: TOF MS ES+  
1.19e7

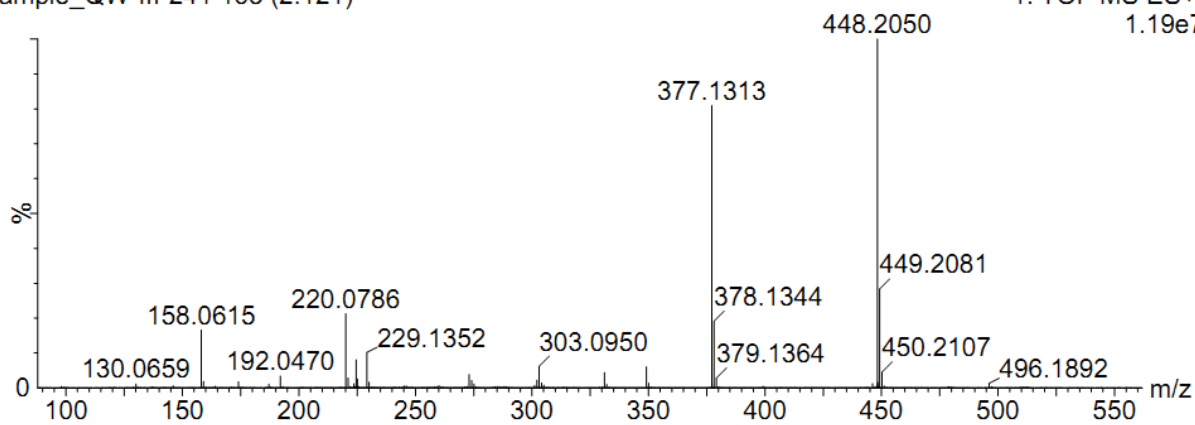

HR-MS of 10s

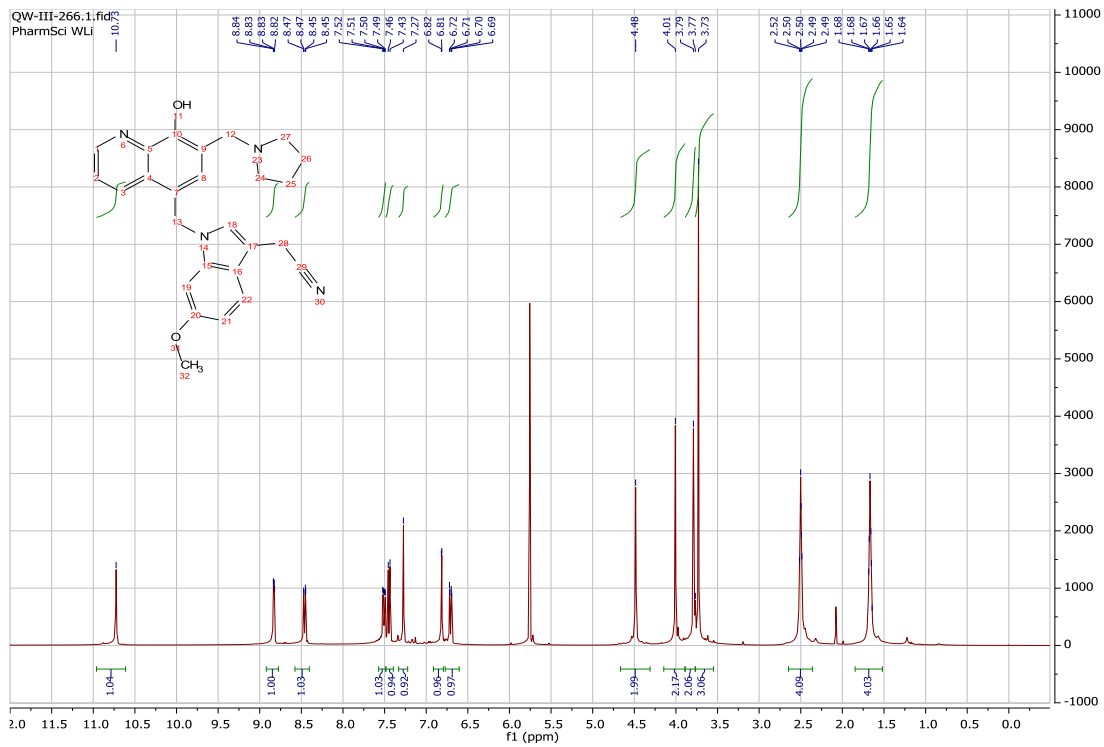

<sup>1</sup>H-NMR of 10t

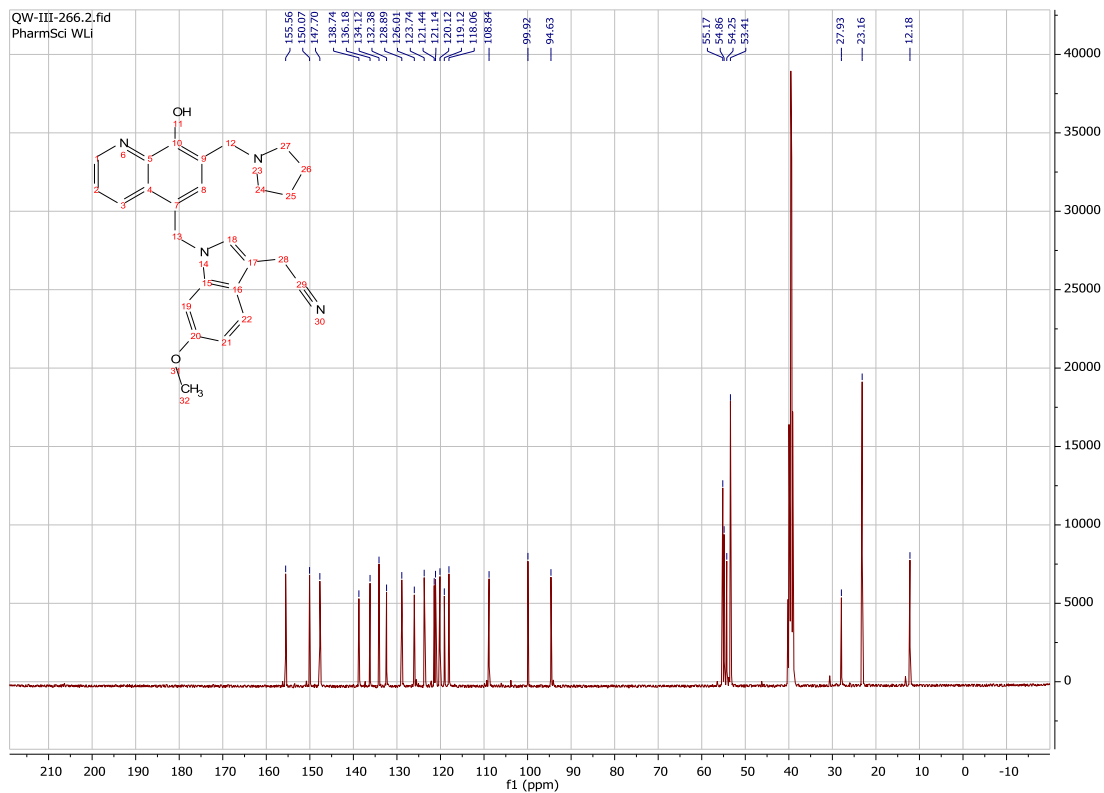

<sup>13</sup>C-NMR of 10t

QW-III-266\_103017 104 (1.949)

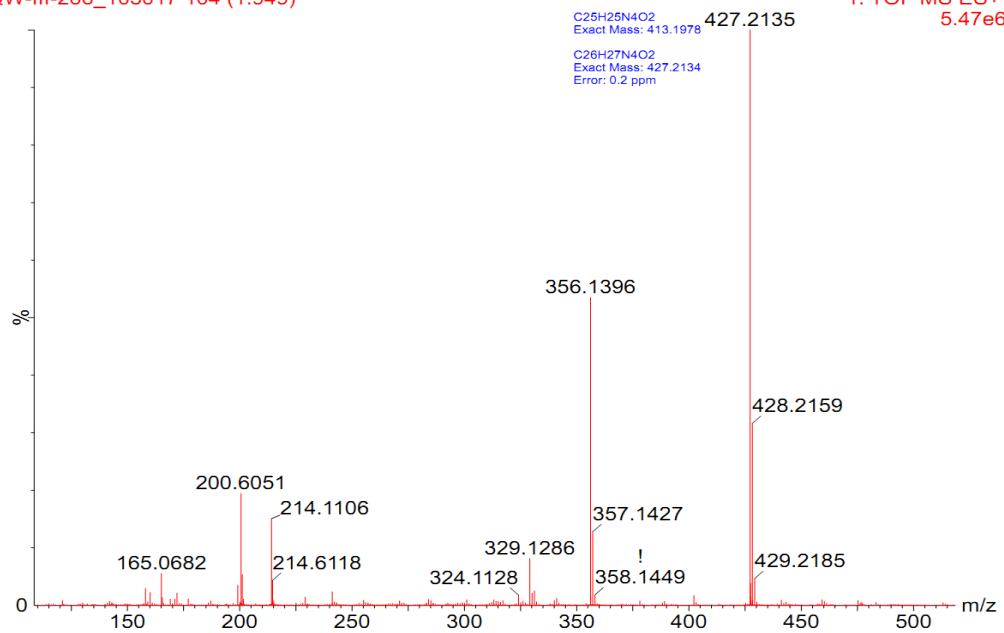

1: TOF MS ES+  
5.47e6

HR-MS of 10t

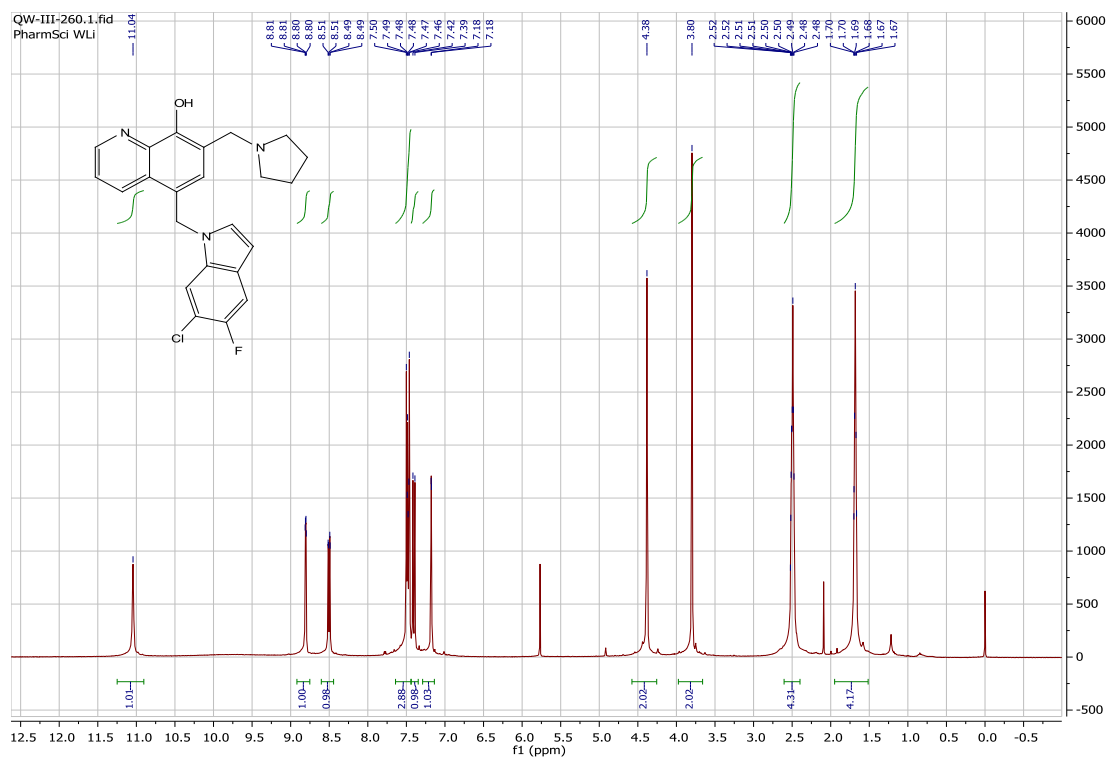

<sup>1</sup>H-NMR of 10u

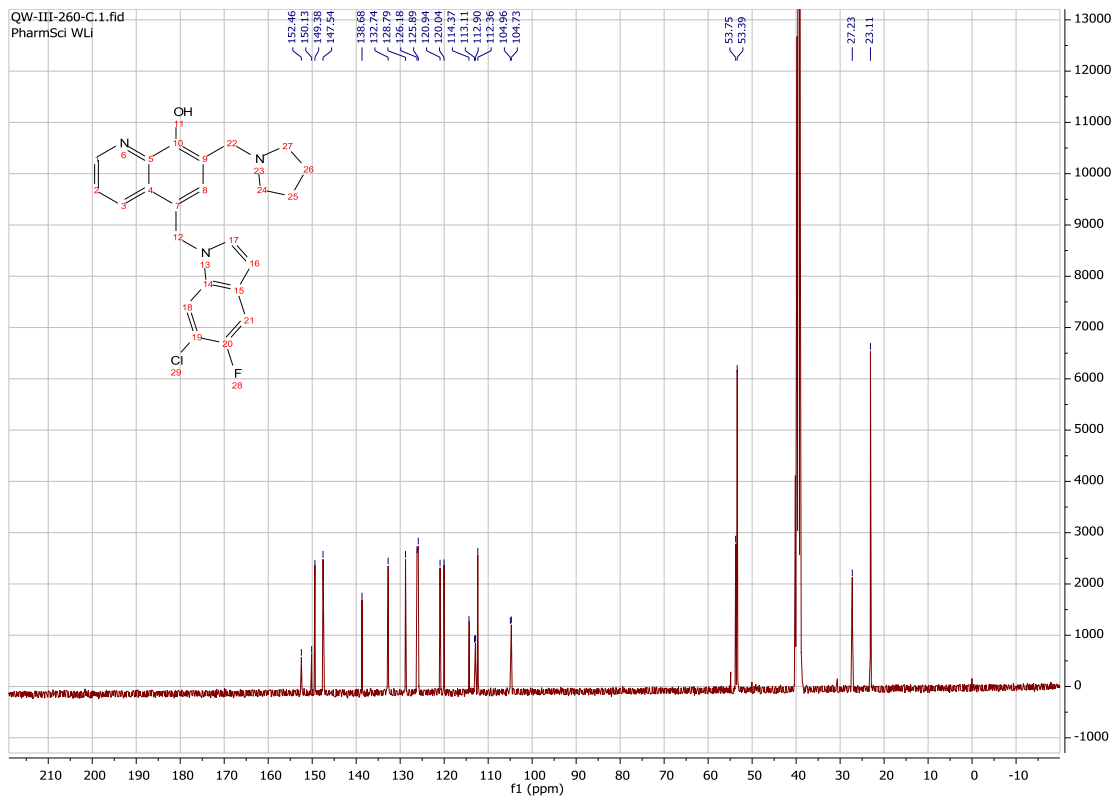

$^{13}\text{C-NMR}$  of **10u**

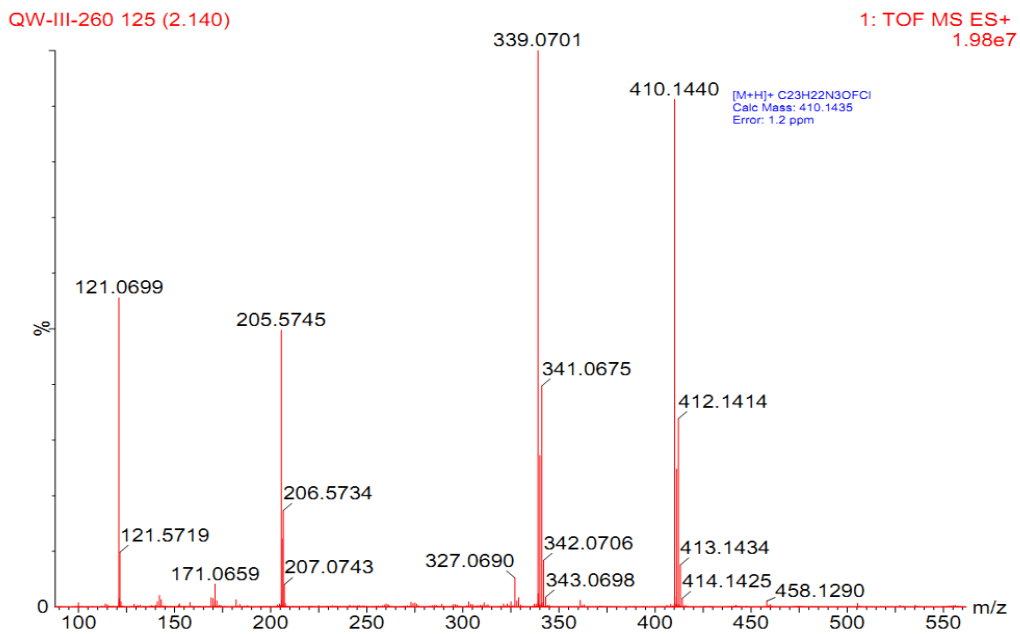

HR-MS of **10u**

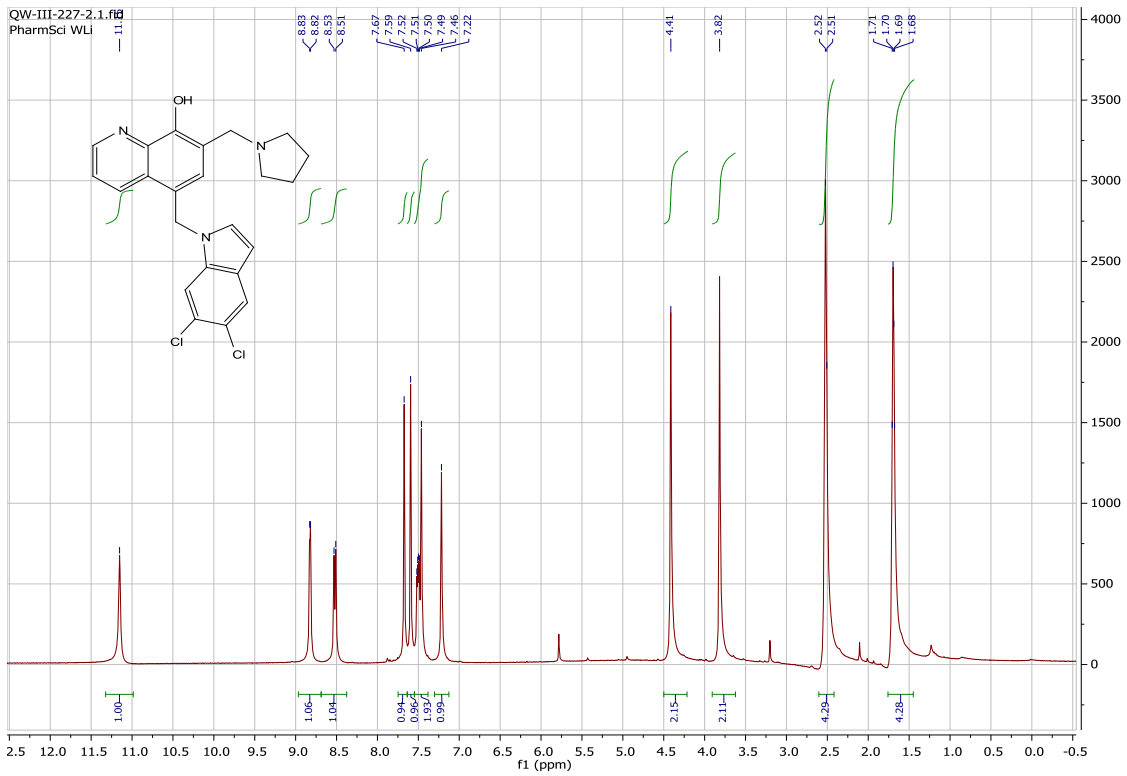

<sup>1</sup>H-NMR of 10v

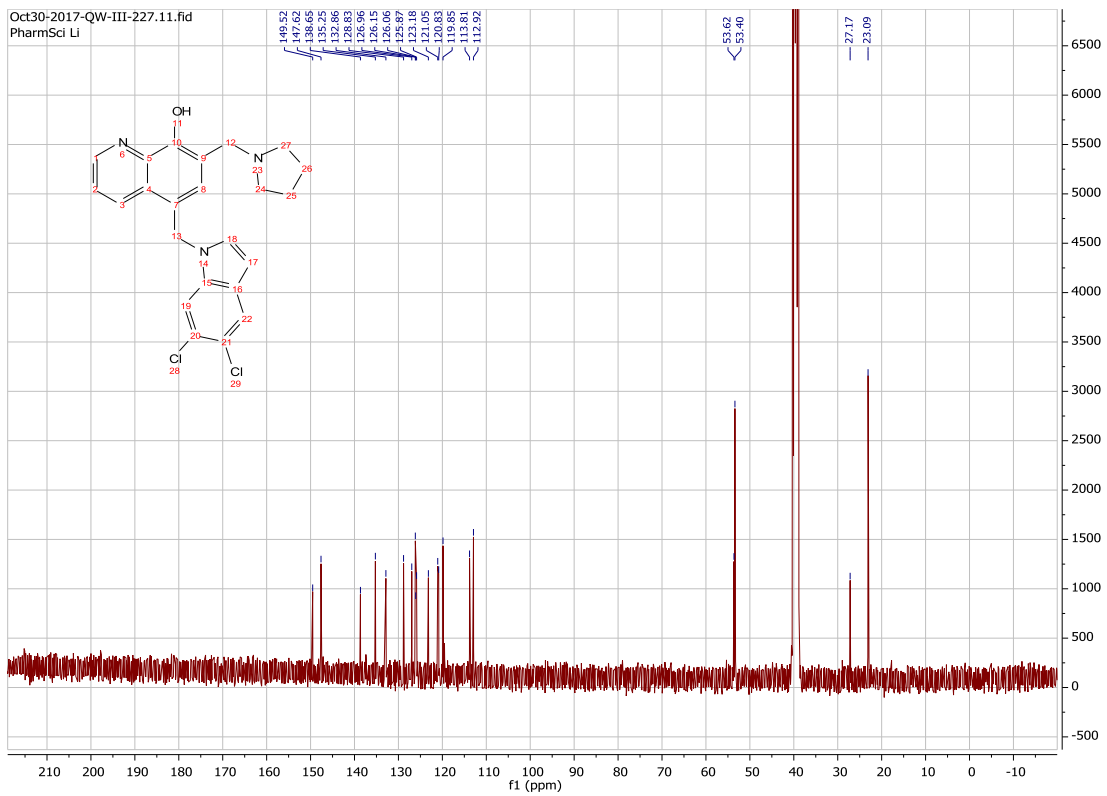

<sup>13</sup>C-NMR of 10v

QW-III-227 137 (2.255)

1: TOF MS ES+  
2.20e7

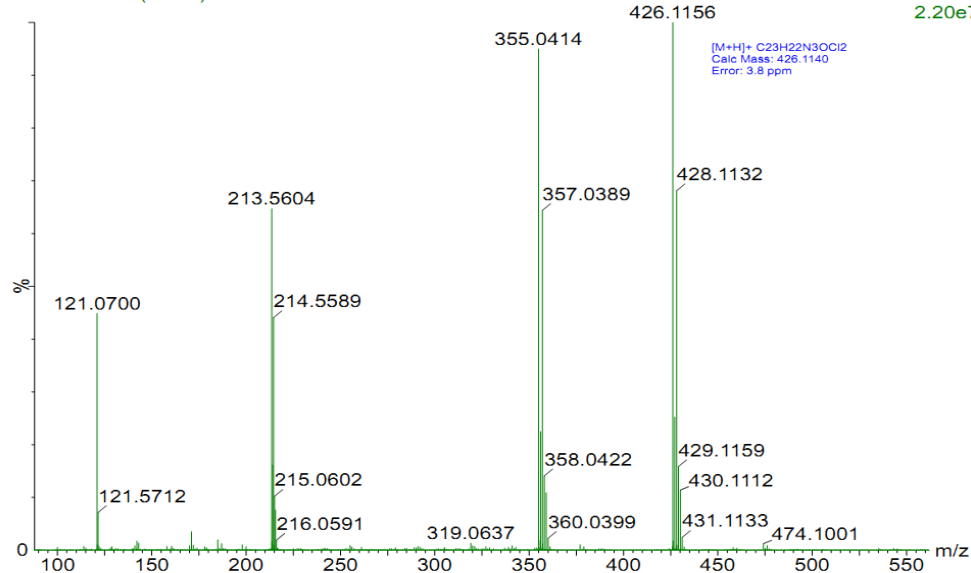

HR-MS of 10v

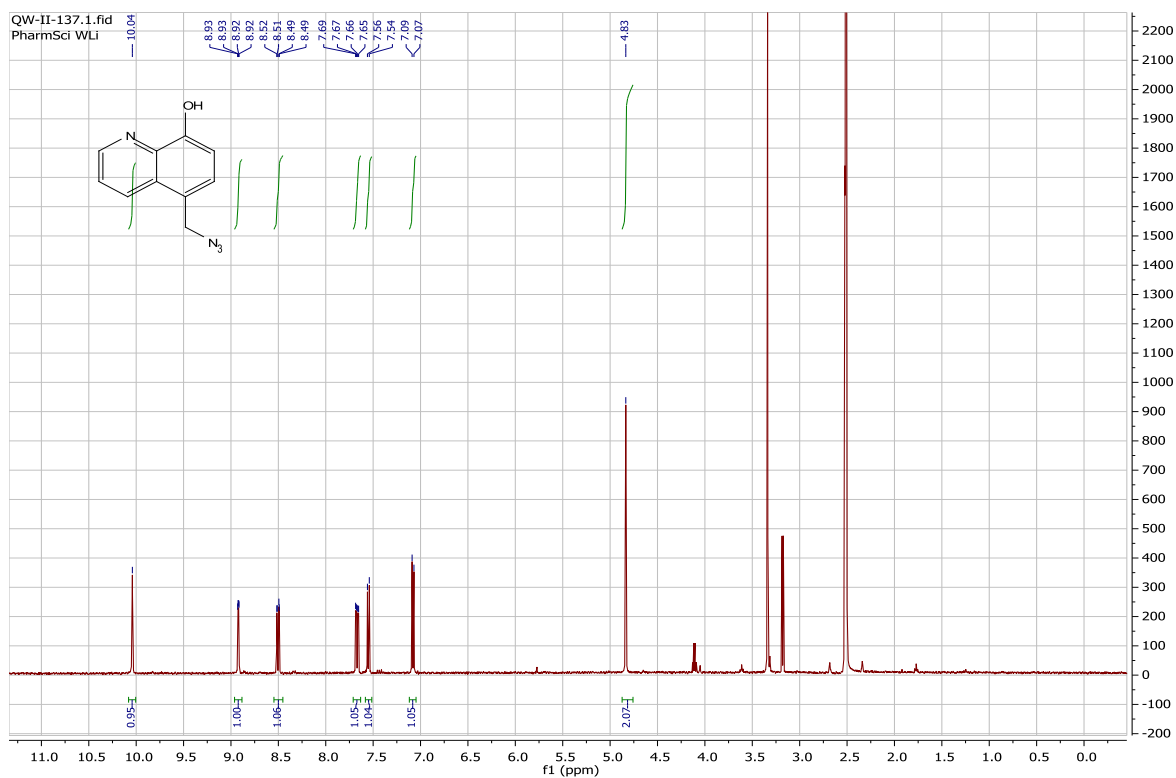

$^1H$ -NMR of 3



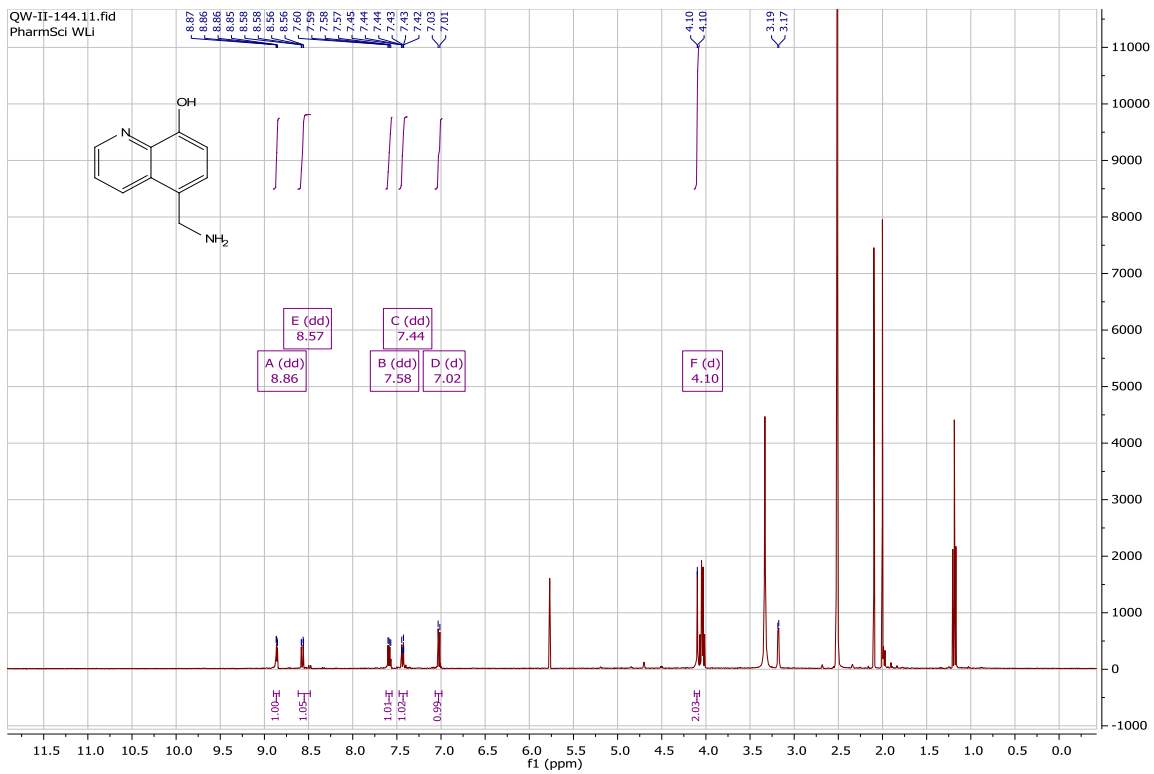

<sup>1</sup>H-NMR of 4

**Figure S1. Surface representation of 10f binding in survivin protein.** The right picture is obtained by rotating the left picture by 90 degrees to show the close latching of **10f** to survivin.
